# Supplementary material for: Socioeconomic differences in hearing among middle-aged and older adults: cross-sectional analyses using the Health Survey for England
Source: PubMed Central journal article supplement — BMJ Open. 2018 Feb 1;8(2):e019615. doi: 10.1136/bmjopen-2017-019615 (PMC5829909; doi:10.1136/bmjopen-2017-019615), 2018-02-01
Supplement: bmjopen-2017-019615.draft_revisions.pdf [file bmjopen-2017-019615.draft_revisions.pdf]

# BMJ Open

BMJ Open is committed to open peer review. As part of this commitment we make the peer review history of every article we publish publicly available.

When an article is published we post the peer reviewers' comments and the authors' responses online. We also post the versions of the paper that were used during peer review. These are the versions that the peer review comments apply to.

The versions of the paper that follow are the versions that were submitted during the peer review process. They are not the versions of record or the final published versions. They should not be cited or distributed as the published version of this manuscript.

BMJ Open is an open access journal and the full, final, typeset and author-corrected version of record of the manuscript is available on our site with no access controls, subscription charges or pay-per-view fees (<http://bmjopen.bmj.com>).

If you have any questions on BMJ Open's open peer review process please email [editorial.bmjopen@bmj.com](mailto:editorial.bmjopen@bmj.com)

# BMJ Open

## Socioeconomic differences in hearing among middle-aged and older adults: cross-sectional analyses using the Health Survey for England

|                                 |                                                                                                                                                                                                                             |
|---------------------------------|-----------------------------------------------------------------------------------------------------------------------------------------------------------------------------------------------------------------------------|
| Journal:                        | <i>BMJ Open</i>                                                                                                                                                                                                             |
| Manuscript ID                   | bmjopen-2017-019615                                                                                                                                                                                                         |
| Article Type:                   | Research                                                                                                                                                                                                                    |
| Date Submitted by the Author:   | 14-Sep-2017                                                                                                                                                                                                                 |
| Complete List of Authors:       | Scholes, Shaun; UCL, Dept of Epidemiology and Public Health<br>Biddulph, Jane; UCL, Dept of Epidemiology and Public Health<br>Davis, Adrian; UCL, UCL Ear Institute<br>Mindell, Jennifer; UCL, Epidemiology & Public Health |
| <b>Primary Subject Heading</b>: | Ear, nose and throat/otolaryngology                                                                                                                                                                                         |
| Secondary Subject Heading:      | Epidemiology, Public health                                                                                                                                                                                                 |
| Keywords:                       | hearing loss, hearing aids, EPIDEMIOLOGY, social inequalities                                                                                                                                                               |
|                                 |                                                                                                                                                                                                                             |

SCHOLARONE™  
Manuscripts

1  
2  
3 **Socioeconomic differences in hearing among middle-aged and older adults: cross-**  
4 **sectional analyses using the Health Survey for England**

5  
6  
7 Shaun Scholes<sup>1\*</sup>, Jane Biddulph<sup>1</sup>, Adrian Davis<sup>2</sup>, Jennifer S Mindell<sup>1</sup>  
8  
9

10 <sup>1</sup> Department of Epidemiology and Public Health, UCL (University College London),  
11 London, WC1E 6BT, UK  
12

13 <sup>2</sup> UCL Ear Institute, UCL (University College London), London, WC1E 6BT, UK  
14

15 \* Corresponding author: Shaun Scholes, Department of Epidemiology and Public Health,  
16 UCL, 1-19 Torrington Place, London, WC1E 6BT, UK; E-mail: [s.scholes@ucl.ac.uk](mailto:s.scholes@ucl.ac.uk)  
17  
18

19  
20 **Keywords:** hearing loss; hearing aids; surveys; epidemiology; social inequalities  
21  
22  
23  
24  
25  
26  
27  
28  
29  
30  
31  
32  
33  
34  
35  
36  
37  
38  
39  
40  
41  
42  
43  
44  
45  
46  
47  
48  
49  
50  
51  
52  
53  
54  
55  
56  
57  
58  
59  
60

### Strengths and limitations

- Estimates of the burden of hearing loss, the use of hearing aids among persons with hearing loss, and their associations with socioeconomic status, are rarely available from nationally-representative health examination surveys.
- We used data from a screening audiometry device to estimate the prevalence of hearing loss. The prevalence of current hearing aid use was estimated among persons with hearing loss.
- The associations between different markers of socioeconomic status and hearing were examined after adjustment for a wide range of confounders such as age, exposure to work-related noise, and risk factors for cardiovascular disease.
- Exclusion of persons from the study due to difficulties in interviewer-participant communication through conditions such as deafness means that our estimates are likely to underestimate the true prevalence of hearing loss among community-dwelling middle-aged and older adults.

## ABSTRACT

**Background:** Hearing loss impacts on cognitive, social and physical functioning. Both hearing loss and hearing aid use vary across population subgroups. We examined whether objectively measured hearing loss, and reported hearing aid use among persons with hearing loss, were associated with different markers of socioeconomic status (SES) in a nationally-representative sample of community-dwelling middle-aged and older adults.

**Methods:** Hearing was measured using an audiometric screening device in the Health Survey for England 2014 (3292 participants aged 45 years and over). Hearing loss was defined as  $\geq 35$ dBHL at 3.0 kHz in the better-hearing ear. Using sex-specific logistic regression modelling, we evaluated the associations between SES and hearing after adjustment for potential confounders.

**Results:** 26% of men and 20% of women aged 45 years and over had hearing loss. Hearing loss was higher among men in the lowest SES groups. For example, the multivariable-adjusted odds of hearing loss were almost twice as high for those in the lowest versus the highest income tertile [Odds Ratio (OR): 1.77; 95% CI: 1.15, 2.74]. Among those with hearing loss, 30% of men and 27% of women were currently using a hearing aid. Compared with men in the highest income tertile, the multivariable-adjusted odds of using a hearing aid nowadays were lower for men in the middle (OR: 0.50; 95% CI: 0.25, 0.99) and the lowest (OR: 0.47; 95% CI: 0.23, 0.97) income tertiles. SES was not associated with hearing outcomes among women.

**Conclusions:** Whilst the burden of hearing loss fell highest among persons in the lowest SES groups, hearing aid use was demonstrably lower. Initiatives to detect hearing loss early and increase the uptake and the use of hearing aids may provide substantial public health benefits and reduce socioeconomic inequalities in health.

## INTRODUCTION

Hearing loss is well known to impact on cognitive, social and physical functioning.<sup>1-3</sup> It can be congenital, but most is acquired and is sensorineural and irreversible in nature.<sup>4</sup> Preventing hearing loss requires understanding its aetiology and risk factors.<sup>5</sup> Epidemiological studies have shown that hearing loss increases with age<sup>6-8</sup> and increases with the duration of exposure to work-related noise. It is higher among men<sup>6-8</sup>, higher among persons with cardiovascular disease risk factors, and is inversely associated with socioeconomic status (SES).<sup>6-9</sup> Early detection and hearing aid use may be effective at ameliorating the impact of hearing loss.<sup>10</sup> However, levels of hearing aid use among persons most likely to benefit are low, especially among persons in the lowest SES groups.

Based on the UK National Study of Hearing conducted in four cities in the early 1980s, 16% of adults aged 17-80years had a bilateral, and 25% had a unilateral or bilateral, hearing loss.<sup>11</sup> Uptake and use of hearing aids was low, with uptake being 10-30% among persons with hearing loss, and up to 25% of hearing aid owners never using them.<sup>12</sup> To provide up-to-date estimates of the burden of hearing loss, the Health Survey for England 2014 included, for the first time in a nationally-representative sample of the population, valid screening audiometry data. The aim of this study was to estimate the prevalence of (1) hearing loss, and (2) current hearing aid use (among persons with hearing loss), in this sample of community-dwelling middle-aged and older adults across population subgroups defined by demographics, work-related noise exposure, and by the presence of cardiovascular disease risk factors. We also examined the associations between SES and hearing.

## METHODS

### Study population

1  
2  
3 The present study used data from the Health Survey for England (HSE). The HSE is an  
4 annual, nationally-representative cross-sectional survey of the non-institutionalised general  
5 population. Multistage stratified probability sampling is used with postcode sectors as the  
6 primary sampling unit and the Postcode Address File as the sampling frame for households.  
7  
8 Details about the HSE are described elsewhere.<sup>13</sup> Interview and nurse-visit response rates  
9 were 55% and 37%, respectively. Participants gave verbal consent to be interviewed, visited  
10 by a nurse, participate in a hearing test, and have blood pressure and anthropometric  
11 measurements taken, and gave written consent for blood sampling. Ethical approval was  
12 obtained from the Oxford A Research Ethics Committee (12/SC/0317).  
13  
14

15  
16 All participants (aged 16 years and over) who had a nurse-visit were eligible for the hearing  
17 test, excluding those with a cochlear implant or with a current ear infection (Figure 1).  
18

19  
20 Participants aged 16-44 years were excluded due to hearing loss being comparatively rare  
21 ( $n=46$ ). In addition, a number of persons would have been excluded if interviewer-participant  
22 communication difficulties through conditions such as deafness were sufficient to prevent  
23 inclusion in the study. The final analytical sample was 3292 participants.  
24  
25

26  
27  
28  
29  
30  
31  
32  
33  
34  
35  
36  
37  
38  
39  
40  
41  
42  
43  
44  
45  
46  
47  
48  
49  
50  
51  
52  
53  
54  
55  
56  
57  
58  
59  
60  
*(Figure 1 here)*

### Objective hearing test

41  
42 Hearing was measured using an audiometric screening device (HearCheck screener, Siemens,  
43 Erlangen, Germany) in participants' own homes. Two evaluation studies comparing the  
44 results of the screener to pure tone audiometry showed good sensitivity (range: 78% to 92%)  
45 and acceptable to good specificity (62% to 95%).<sup>14;15</sup> This handheld device produced a series  
46 of three sounds of decreasing volume at 1.0 kHz (55dBHL, 35dBHL and 20dBHL) and then  
47 at 3.0 kHz (75dBHL, 55dBHL and 35dBHL). Both ears were tested, starting with the left.  
48  
49 Participants were instructed to indicate when they heard a noise by raising their finger. If an  
50  
51  
52  
53  
54  
55  
56  
57  
58  
59  
60

1  
2  
3 irregular pattern was found (a combination of responses indicating that quieter sounds were  
4 heard but louder ones were not), the test was repeated at least 60s later for that ear.

5  
6  
7 Participants with an irregular pattern at the first test, but a regular pattern at the second test,  
8  
9 were included in the analyses. Further details of the testing procedures are available  
10  
11 elsewhere.<sup>16</sup>  
12

## 13 14 **Outcomes**

### 15 16 *Hearing loss*

17  
18  
19 Hearing loss was defined as  $\geq 35$ dBHL at 3.0 kHz in the better-hearing ear, the level at which  
20  
21 intervention has been shown to be definitely beneficial.<sup>17</sup> Hearing loss was subdivided into  
22  
23 two mutually exclusive categories: (1) ‘moderate loss’ :  $>35$ dBHL to 54dBHL (tone not  
24  
25 heard at 35dBHL, but heard at 55dBHL and at 75dBHL), and (2) ‘moderately severe or  
26  
27 severe loss’ :  $>55$ dBHL (tone not heard at 35dBHL and at 55dBHL, but the tone may, or may  
28  
29 not, have been heard at 75dBHL). Prevalence estimates were multiplied by the 2014  
30  
31 household population to estimate the number of people with hearing loss.<sup>18</sup>  
32  
33

### 34 35 *Hearing aid use*

36  
37 As part of the main interview, participants were asked if they ever wore a hearing aid  
38  
39 nowadays: those who reported that they did not were asked whether they had ever tried one.  
40  
41

## 42 43 **Markers of socioeconomic status**

44  
45 Tertiles of equivalised household income, quintiles of the area-based Index of Multiple  
46  
47 Deprivation (IMD 2010: Q1 least deprived; Q5 most deprived)<sup>19</sup>, and the highest formal  
48  
49 educational attainment (degree or higher, below degree, no qualifications) were chosen as  
50  
51 related, but different, markers of SES. Broader categories of SES were used for the analysis  
52  
53 of hearing aid use – among persons with hearing loss - due to smaller sample sizes.  
54  
55

## 56 57 **Covariates**

58  
59 6



1  
2  
3 Covariates were grouped into: (1) demographic characteristics (age, region), (2) exposure to  
4 work-related noise, and (3) risk factors for cardiovascular disease (cigarette smoking, body  
5 mass index, diabetes, hypertension, dyslipidaemia, and physical inactivity). Modifiable risk  
6 factors for cardiovascular disease are well-known to be independently associated with  
7 hearing impairment<sup>20,21</sup>, and potentially confound the associations between SES and hearing  
8 loss. Age-at-interview was categorized into four groups (45-54, 55-64, 65-74, and 75+ years).  
9 Government Office Region was grouped into North, Midlands, London, and South. Duration  
10 of exposure to work-related noise was established by asking participants whether they had  
11 ever worked in a place that was so noisy that you had to shout to be heard (response  
12 categories: 'no', 'yes, for less than 1 year', 'yes, for at least 1 year but less than 5 years', and  
13 'yes, for 5 years or longer'). Cigarette smoking status categories were current, ex-regular and  
14 never. Single measurements of height and weight were taken by trained interviewers using  
15 standard protocols. Body mass index (BMI) was computed as weight in kilogrammes (kg)  
16 divided by height in metres squared (m<sup>2</sup>): participants were classified as normal-weight  
17 (18.5-24.9kg/m<sup>2</sup>), overweight (25.0-29.9kg/m<sup>2</sup>), or obese ( $\geq 30.0$ kg/m<sup>2</sup>). We used two  
18 indicators of hyperglycaemia: self-reported physician diagnosis of diabetes, and a raised  
19 glycated haemoglobin (HbA<sub>1c</sub>  $\geq 48$ mmol/mol) irrespective of diagnosis. Hypertension was  
20 defined as systolic blood pressure  $\geq 140$  mmHg and/or diastolic blood pressure  $\geq 90$  mmHg  
21 and/or current use of medication taken for the purposes of lowering blood pressure. Total  
22 cholesterol was measured in non-fasting blood samples. Dyslipidaemia was defined as total  
23 cholesterol  $\geq 5.0$ mmol/L and/or current use of lipid-lowering medication. Based on the Short-  
24 Form International Physical Activity Questionnaire (IPAQ), participants spending  $< 30$   
25 minutes per week in moderate-to-vigorous physical activity were classed as physically  
26 inactive.<sup>22</sup> Broader categories of these covariates were used in some cases for the analysis of  
27 hearing aid use due to smaller sample sizes.

## Statistical analysis

All analyses were sex-specific. Hearing loss prevalence (overall and by severity) was estimated among the overall population and as stratified by demographic characteristics, exposure to work-related noise, CVD risk factors, and SES. Prevalence estimates were directly age-standardised within sex to the English household population using the four age-groups described above. Differences in the prevalence of hearing loss across groups were evaluated using the chi-square  $\chi^2$  test. This analysis was repeated to estimate the prevalence of current hearing aid use among those participants with hearing loss.

Logistic regression modelling was used to evaluate the association between SES and hearing loss after adjustment for demographics, exposure to work-related noise, and CVD risk factors. Associations were summarised using Odds Ratios (OR) with 95% Confidence Intervals (CI). We decided a priori to run separate models for the three indicators of SES rather than estimate a single model to avoid multicollinearity. Two sequential models were fitted. SES and hearing loss associations were age-adjusted (Model A), and then further adjusted for region, exposure to work-related noise, and CVD risk factors (Model B). SES was entered in the models as a categorical variable, with the highest status group as the reference category. We repeated the analyses to evaluate the association between SES and current hearing aid use, with an additional adjustment for the severity of hearing loss. All analyses accounted for the complex survey design, incorporating the nurse-visit weight which accounted for individual non-participation and preserved the national representativeness of the sample. Data set preparation was performed in SPSS V.20.0 (SPSS IBM Inc., Chicago, Illinois, USA). Statistical analysis was conducted using Stata V13.1 (College Station, Texas, USA). The HSE 2014 dataset is available via the UK Data Service (<http://www.ukdataservice.ac.uk>).

## RESULTS

8

1  
2  
3 Compared to participants with data collected from the nurse-visit stage, participants  
4 interviewed in the survey but without data from the nurse visit were more likely to be in the  
5 lowest income tertile ( $P=0.002$ ), had no formal educational qualifications ( $P<0.001$ ), resided  
6 in the most deprived IMD quintile ( $P<0.001$ ), and currently smoked cigarettes ( $P=0.011$ )  
7  
8  
9  
10  
11 (Supplementary Table 1).

### 14 **Hearing loss**

16 Table 1 shows the age-standardised estimates of the prevalence of hearing loss. For  
17 simplicity, we present only estimates by age, duration of exposure to work-related noise, and  
18 each indicator of socioeconomic status in the main text, with the estimates for region and  
19 each CVD risk factor available as Supplementary data. Overall, 26% of men and 20% of  
20 women aged 45 years and over had hearing loss defined as  $\geq 35$ dBHL at 3.0 kHz in the better-  
21 hearing ear ( $n=769/3292$ ), equivalent to 5.2million persons. The prevalence of ‘moderate’  
22 loss (15% men, 12% women) exceeded that of ‘moderately severe or severe’ loss (11% and  
23 7%). Hearing loss increased monotonically with age, reaching 67% of men and 58% of  
24 women aged 75+ years. Only among men in the oldest age-group did the prevalence of  
25 ‘moderately severe or severe’ loss (39%) exceed that of ‘moderate’ loss (29%). Among men,  
26 hearing loss was higher among those exposed to work-related noise for  $\geq 5$  years ( $P<0.001$ ),  
27 in the lowest income tertile ( $P=0.005$ ), residing in areas of higher deprivation ( $P=0.011$ ), and  
28 with no formal educational qualifications ( $P<0.001$ ). Patterns among women were similar,  
29 yet typically weaker. Of the risk factors for cardiovascular disease, hearing loss was higher  
30 among men and women with doctor-diagnosed diabetes, with elevated Hb1Ac irrespective of  
31 diagnosis, and among women classed as physically inactive (Supplementary Table 2).

32  
33  
34  
35  
36  
37  
38  
39  
40  
41  
42  
43  
44  
45  
46  
47  
48  
49  
50  
51  
52 *(Table 1 here)*  
53  
54  
55  
56  
57

1  
2  
3 Figure 2 shows the associations between SES and hearing loss (expressed as odds ratios) after  
4 age (Model A) and additional adjustment for region, duration of exposure to work-related  
5 noise, and CVD risk factors (Model B). Among men, the multivariable-adjusted associations  
6 were partly attenuated: nevertheless, the multivariable-adjusted odds of hearing loss showed a  
7 strong socioeconomic gradient. The odds of hearing loss were almost twice as high for men  
8 in the lowest versus the highest income tertile (OR: 1.77; 95% CI: 1.15, 2.74) and were over  
9 twice as high for men with no formal educational qualifications versus those with at least a  
10 degree (OR: 2.35; 95% CI: 1.54, 3.59). For women, SES was not significantly associated  
11 with hearing loss.  
12  
13  
14  
15  
16  
17  
18  
19  
20  
21

22  
23 *(Figure 2 here)*  
24

### 25 **Current hearing aid use**

26  
27 Among participants with hearing loss, 30% of men and 27% of women wore hearing aids  
28 nowadays ( $n=264/769$ ; Table 2). Lower proportions had tried hearing aids in the past, but not  
29 currently (7% men, 10% women) (data not shown). Current use for persons with ‘moderately  
30 severe or severe’ loss (53% men, 47% women) exceeded that for persons with ‘moderate’  
31 loss (18% men, 19% women). Use increased monotonically with age but was confined to the  
32 minority, reaching close to 40% for participants aged 75+ years.  
33  
34  
35  
36  
37  
38  
39  
40

41  
42 *(Table 2 here)*  
43

44 Differences in hearing aid utilisation by population subgroups were typically minor, with the  
45 exception of lower use among women classed as physically inactive (Supplementary Table  
46 3). Lower use among participants reporting doctor-diagnosed diabetes was also noteworthy.  
47  
48 Figure 3 shows the associations between SES and current hearing aid use after age- (Model  
49 A) and full-adjustment (Model B). Compared with men in the highest income tertile, the  
50 multivariable-adjusted odds of using a hearing aid nowadays were lower for men in the  
51  
52  
53  
54  
55  
56  
57

1  
2  
3 middle (OR: 0.50; 95% CI: 0.25, 0.99) and lowest (OR: 0.47; 95% CI: 0.23, 0.97) income  
4  
5 tertiles. Area deprivation and educational attainment was associated with hearing aid use in  
6  
7 the same direction, yet typically more weakly. For women, SES was not associated with  
8  
9 hearing aid use.  
10

11  
12 *(Figure 3 here)*  
13

## 14 **DISCUSSION**

15  
16  
17 In this nationally-representative sample of community-dwelling persons aged 45 years and  
18  
19 over, more than one in four persons had a level of hearing loss that would benefit from  
20  
21 hearing aid use. However, less than one in three persons with hearing loss reported using a  
22  
23 hearing aid nowadays, suggesting a significant level of unmet need. The burden of hearing  
24  
25 loss fell highest among persons in the lowest SES groups, especially among men, suggesting  
26  
27 hearing loss as a source of socioeconomic inequalities in health. Even after adjustment for the  
28  
29 severity of hearing loss, hearing aid use was evidently lower for men in the middle- and low-  
30  
31 income groups compared with their high-income counterparts.  
32  
33

34  
35 Comparisons with previous studies are difficult due to differences in the age-range of  
36  
37 participants.<sup>6</sup> Considerable heterogeneity also exists in the definition and the measurement of  
38  
39 hearing loss.<sup>23</sup> The WHO defines adult disabling hearing impairment as a permanent unaided  
40  
41 hearing threshold for the better-hearing ear of  $\geq 41$  dBHL (averaged over 0.5, 1.0, 2.0 and 4.0  
42  
43 kHz).<sup>24</sup> Using this definition, disabling hearing loss was estimated to affect 360 million  
44  
45 people worldwide in 2012 (more than 5% of the global population).<sup>25</sup> The Global Burden of  
46  
47 Disease Hearing Loss Expert Group uses a threshold of  $>35$  dBHL for all age-groups, and  
48  
49 equates “unilateral hearing impairment” with “bilateral mild hearing impairment”.<sup>7</sup> The  
50  
51 estimated global prevalence of hearing loss using this alternative definition was 12% for  
52  
53 males and 10% for females aged  $\geq 15$  in 2008.<sup>7</sup> Analysis of HSE 2014 data by the same  
54  
55  
56  
57

1  
2  
3 authors of the present study found that 13% of adults (14% men, 12% women) had loss of  
4  $\geq 35$ dBHL at 3.0 kHz in the better-hearing ear.<sup>16</sup> Our findings of differences in the burden of  
5 hearing loss agree with other population-based studies in which the prevalence of hearing  
6 loss was higher for men than women<sup>6-8 8;26-29</sup>, increased monotonically with age<sup>6-8 11 26-28 30;31</sup>,  
7 increased with longer exposure to occupational noise<sup>6-8</sup>, co-existed with CVD risk factors  
8 such as diabetes<sup>6;8;21;31;32</sup>, and was higher in the lowest SES groups<sup>6;27;28;30;31;33</sup>, especially for  
9 men.<sup>9</sup> In contrast to other studies<sup>6;8;31;32</sup>, hearing loss did not vary in the present study by  
10 current smoking status.

11  
12 Other studies have shown similar or lower levels of hearing aid use among persons with  
13 hearing loss. Using the Digit Triplet Test, 21.5% of UK Biobank participants aged 40-  
14 69 years with 'poor' speech recognition in noise testing reported using a hearing aid.<sup>30</sup> Based  
15 on the 1999-2006 US National Health and Nutrition Examination Survey, hearing aid use  
16 among participants aged 50+ years with hearing loss was 14.2%.<sup>34</sup> Our findings of subgroup  
17 differences in levels of hearing aid use are consistent with other studies which showed that  
18 use increases with age<sup>34;35</sup> and with the severity of hearing loss.<sup>34;36</sup> Our finding of lower  
19 utilisation among men in the lowest SES groups, independent of the severity of hearing loss,  
20 is also consistent with other studies.<sup>30;35-38</sup>

21  
22 Associations between SES and hearing loss likely involve multiple simultaneous pathways<sup>27</sup>  
23 including other concomitant factors of lower SES such as educational and employment  
24 factors (including exposure to work-related noise), and modifiable lifestyle factors.<sup>8</sup> While  
25 occupational noise is now limited and generally well-controlled in the UK<sup>39</sup>, past exposure  
26 may have had serious long-term consequences for hearing in middle- and older-age. It  
27 remains unclear whether hearing loss is a driver of low SES or whether low SES is a driver of  
28 hearing loss.<sup>27</sup> The diabetes-hearing loss associations found in our study are in agreement  
29 with a recent meta-analysis.<sup>40</sup> Greater atrophy of the stria vascularis is a potential biologic  
30

1  
2  
3 mechanism for this association.<sup>21;40-43</sup> Finally, this study confirms the low level of current  
4 hearing aid use, especially among men in the lowest SES groups. Previous studies have  
5 demonstrated non-financial barriers to uptake and use, with self-recognition of hearing  
6 problems being the strongest factor.<sup>44</sup> Low take-up and use are typically attributed to a  
7 perception of hearing loss being an inconsequential part of ageing.<sup>34</sup> Although treatment and  
8 hearing aid provision is financially supported in the UK through the National Health Service,  
9 persons in the lower SES groups use specialist health services less frequently than those in  
10 higher SES groups.<sup>45</sup>

11  
12  
13  
14  
15  
16  
17  
18  
19  
20 The main strength of this study was the use of valid screening audiometry data within a  
21 nationally-representative health examination survey. Objectively-measured hearing loss data  
22 overcomes the under-estimation of socioeconomic inequalities in health that are typically  
23 associated with self-reports.<sup>46</sup> Other analyses of HSE 2014 showed that socioeconomic  
24 inequalities in hearing were most apparent using objective but not self-report data<sup>16</sup>, partly  
25 reflecting differences in levels of expectations, and differences in levels of awareness of  
26 adverse health conditions<sup>47</sup>. This study also has a number of limitations. Differences in the  
27 propensity to respond at the nurse-visit may have weakened the sample's representativeness  
28 and reduced the generalizability of our findings, but the use of statistical weights to account  
29 for the biases in individual participation would have mitigated this to a considerable extent.  
30  
31  
32  
33  
34  
35  
36  
37  
38  
39  
40  
41  
42  
43  
44  
45  
46  
47  
48  
49  
50  
51  
52  
53  
54  
55  
56  
57  
58  
59  
60

The estimates of hearing loss prevalence are conservative due to the exclusion of: (1) the institutionalised population, (2) individuals with a cochlear implant or with a current ear infection, and (3) the exclusion of an unknown number of individuals with conditions such as deafness that were judged to impede interviewer-participant communication. The relatively small number of participants with hearing loss may have resulted in our analyses of hearing aid use to be underpowered to detect differences among subgroups. For the same reason, we were unable to examine differences in utilisation among subgroups stratified by the severity

1  
2  
3 of hearing loss. Insufficient numbers meant that we were unable to provide separate reliable  
4  
5 estimates for minority ethnic groups. Our findings could have been influenced by  
6  
7 unmeasured confounders such as the duration of exposure to non-occupational noise. Lastly,  
8  
9 since we utilised cross-sectional data, we could not establish the direction of the observed  
10  
11 associations, and we cannot establish causality.  
12  
13

14 In conclusion, hearing loss is highly prevalent, affecting more than one in four men and more  
15  
16 than one in five women. However, less than one in three persons with hearing loss reported  
17  
18 using a hearing aid nowadays, suggesting a significant level of unmet need. Whilst the burden  
19  
20 of hearing loss falls highest among persons in the lowest SES groups, use of hearing aids is  
21  
22 demonstrably lower. Initiatives to detect hearing loss early, and the increased uptake of  
23  
24 hearing aids, may provide substantial public health benefits and reduce socioeconomic  
25  
26 inequalities in health.  
27  
28

### 29 **Data sharing agreement**

30  
31 The Health Survey for England 2014 dataset is available via the UK Data Service  
32  
33 (<http://www.ukdataservice.ac.uk>). Statistical code is available from the corresponding author  
34  
35 at [s.scholes@ucl.ac.uk](mailto:s.scholes@ucl.ac.uk).

### 36 **Contributors**

37  
38 SS, JB, AD and JM were responsible for developing the design of the study.  
39  
40 SS was responsible for conducting the analyses, interpreting the results, and drafting the  
41  
42 manuscript. SS, JB, AD and JM critically revised the manuscript. All authors have read and  
43  
44 approved the final manuscript.  
45  
46  
47  
48  
49  
50  
51  
52  
53  
54  
55  
56  
57



**Table 1** Age-standardised prevalence (%) and standard error (SE) of hearing loss, persons aged 45 years and over, HSE 2014

| Characteristics                                 | Males |                      |                  |                            |          | Females |                      |                  |                            |          |
|-------------------------------------------------|-------|----------------------|------------------|----------------------------|----------|---------|----------------------|------------------|----------------------------|----------|
|                                                 | n     | Hearing loss % (SE)* | Moderate % (SE)† | Moderate to severe % (SE)‡ | P-value§ | n       | Hearing loss % (SE)* | Moderate % (SE)† | Moderate to severe % (SE)‡ | P-value§ |
| N                                               | 1485  | 425                  | 244              | 181                        | -        | 1807    | 344                  | 217              | 127                        | -        |
| All                                             | 1485  | 26.2 (1.2)           | 15.2 (1.0)       | 11.0 (0.9)                 | -        | 1807    | 19.6 (1.0)           | 12.2 (0.8)       | 7.4 (0.7)                  | -        |
| <b>Age-group:</b>                               |       |                      |                  |                            |          |         |                      |                  |                            |          |
| 45-54                                           | 420   | 8.0 (1.5)            | 7.0 (1.4)        | 1.0 (0.5)                  | <0.001   | 560     | 3.1 (0.9)            | 2.3 (0.7)        | 0.7 (0.4)                  | <0.001   |
| 55-64                                           | 401   | 17.0 (2.0)           | 10.9 (1.7)       | 6.1 (1.2)                  |          | 446     | 10.6 (1.6)           | 8.6 (1.4)        | 2.0 (0.7)                  |          |
| 65-74                                           | 402   | 37.0 (2.5)           | 23.8 (2.2)       | 13.3 (2.0)                 |          | 476     | 20.4 (1.8)           | 14.5 (1.6)       | 5.9 (1.1)                  |          |
| 75+                                             | 262   | 67.3 (3.2)           | 28.6 (2.8)       | 38.7 (3.1)                 |          | 325     | 57.9 (2.9)           | 30.6 (2.5)       | 27.3 (2.6)                 |          |
| <b>Duration of work-related noise exposure:</b> |       |                      |                  |                            |          |         |                      |                  |                            |          |
| None                                            | 819   | 22.2 (1.6)           | 13.4 (1.3)       | 8.9 (1.2)                  | <0.001   | 1468    | 18.6 (1.1)           | 12.1 (0.9)       | 6.5 (0.7)                  | 0.091    |
| Less than 5 years                               | 226   | 24.6 (2.9)           | 11.1 (2.3)       | 13.5 (2.4)                 |          | 128     | 18.8 (3.8)           | 10.8 (3.0)       | 7.9 (2.7)                  |          |
| 5+ years                                        | 434   | 35.1 (2.5)           | 21.5 (2.1)       | 13.6 (1.7)                 |          | 210     | 25.4 (3.0)           | 13.6 (2.4)       | 11.8 (2.2)                 |          |
| <b>Income tertiles:</b>                         |       |                      |                  |                            |          |         |                      |                  |                            |          |
| Highest                                         | 491   | 21.3 (2.5)           | 13.1 (2.0)       | 8.2 (1.7)                  | 0.005    | 484     | 16.5 (2.3)           | 11.0 (1.9)       | 5.5 (1.4)                  | 0.413    |
| Middle                                          | 458   | 28.6 (2.2)           | 16.7 (1.9)       | 12.0 (1.5)                 |          | 562     | 19.3 (1.8)           | 11.9 (1.4)       | 7.4 (1.2)                  |          |
| Lowest                                          | 305   | 32.9 (2.8)           | 19.8 (2.2)       | 13.1 (2.0)                 |          | 417     | 20.1 (1.9)           | 13.1 (1.6)       | 7.0 (1.2)                  |          |
| <b>Index of Multiple Deprivation quintiles:</b> |       |                      |                  |                            |          |         |                      |                  |                            |          |
| Least deprived                                  | 369   | 21.4 (2.2)           | 11.0 (1.8)       | 10.3 (1.7)                 | 0.011    | 448     | 18.6 (2.1)           | 11.4 (1.5)       | 7.2 (1.4)                  | 0.077    |
| 2                                               | 340   | 23.0 (2.4)           | 13.2 (1.8)       | 9.8 (1.7)                  |          | 407     | 17.6 (1.7)           | 11.5 (1.5)       | 6.1 (1.2)                  |          |
| 3                                               | 311   | 27.2 (2.7)           | 17.1 (2.3)       | 10.1 (1.8)                 |          | 392     | 17.5 (2.1)           | 10.9 (1.7)       | 6.6 (1.5)                  |          |
| 4                                               | 255   | 32.6 (2.9)           | 18.2 (2.5)       | 14.4 (2.2)                 |          | 312     | 19.8 (2.6)           | 10.6 (2.1)       | 9.2 (1.7)                  |          |
| Most deprived                                   | 210   | 30.2 (3.3)           | 18.0 (2.6)       | 12.2 (2.6)                 |          | 248     | 26.3 (2.7)           | 18.4 (2.4)       | 7.9 (1.7)                  |          |
| <b>Education status:</b>                        |       |                      |                  |                            |          |         |                      |                  |                            |          |
| Degree or higher                                | 344   | 20.1 (2.6)           | 12.3 (2.1)       | 7.8 (1.7)                  | <0.001   | 309     | 14.5 (3.5)           | 7.8 (2.2)        | 6.7 (2.5)                  | 0.070    |
| Below degree                                    | 733   | 23.2 (1.8)           | 12.8 (1.3)       | 10.4 (1.4)                 |          | 941     | 18.4 (1.6)           | 12.1 (1.2)       | 6.4 (1.1)                  |          |
| No qualifications                               | 407   | 40.1 (3.0)           | 26.5 (2.9)       | 13.7 (1.7)                 |          | 555     | 23.6 (2.1)           | 14.7 (1.8)       | 8.9 (1.1)                  |          |

\* Hearing loss:  $\geq 35$ dBHL at 3.0 kHz (tone not heard at 35dBHL).† Moderate loss:  $>35$  to 54dBHL (tone not heard at 35dBHL, but heard at 55 and at 75dBHL).‡ Moderately severe or severe loss:  $>55$  dBHL (tone not heard at 35 and at 55dBHL, but may or may not have heard the tone at 75dBHL).§ P-values are for comparison across groups with respect to hearing loss ( $\chi^2$  test)

**Table 2** Age-standardized prevalence (%) and standard error (SE) of hearing aid use among persons with hearing loss, persons aged 45 years and over, HSE 2014

| Characteristics                                 | Men |                        |                  | Women |                        |                  |
|-------------------------------------------------|-----|------------------------|------------------|-------|------------------------|------------------|
|                                                 | N   | Hearing aid use % (SE) | <i>P</i> -value* | N     | Hearing aid use % (SE) | <i>P</i> -value* |
| N                                               | 425 | 29.7 (3.1)             |                  | 344   | 26.9 (3.3)             |                  |
| <b>Severity of loss:</b>                        |     |                        |                  |       |                        |                  |
| Moderate <sup>†</sup>                           | 244 | 17.8 (3.2)             | <0.001           | 217   | 19.1 (3.5)             | 0.002            |
| Moderate to severe <sup>‡</sup>                 | 181 | 52.9 (6.3)             |                  | 127   | 47.1 (8.7)             |                  |
| <b>Age-group:</b>                               |     |                        |                  |       |                        |                  |
| 45-64                                           | 101 | 25.4 (4.6)             | 0.056            | 63    | 21.2 (5.1)             | 0.035            |
| 65-74                                           | 147 | 34.3 (4.3)             |                  | 94    | 31.4 (4.9)             |                  |
| 75+                                             | 177 | 40.2 (3.7)             |                  | 187   | 39.1 (3.7)             |                  |
| <b>Duration of work-related noise exposure:</b> |     |                        |                  |       |                        |                  |
| None                                            | 250 | 26.1 (3.9)             | 0.234            | 287   | 25.3 (3.6)             | 0.296            |
| Some                                            | 173 | 33.5 (4.9)             |                  | 56    | 35.5 (9.4)             |                  |
| <b>Income tertiles:</b>                         |     |                        |                  |       |                        |                  |
| Highest                                         | 84  | 36.0 (6.5)             | 0.548            | 54    | 24.7 (6.5)             | 0.900            |
| Middle                                          | 149 | 31.2 (5.5)             |                  | 105   | 28.6 (5.8)             |                  |
| Lowest                                          | 118 | 26.0 (6.1)             |                  | 90    | 26.0 (7.0)             |                  |
| <b>Index of Multiple Deprivation quintiles:</b> |     |                        |                  |       |                        |                  |
| Least deprived 1 & 2                            | 179 | 29.8 (5.3)             | 0.812            | 158   | 29.1 (5.2)             | 0.615            |
| Quintile 3                                      | 101 | 33.5 (8.0)             |                  | 66    | 29.3 (6.6)             |                  |
| Most deprived 4 & 5                             | 145 | 27.9 (4.6)             |                  | 120   | 22.6 (5.6)             |                  |
| <b>Education status:</b>                        |     |                        |                  |       |                        |                  |
| O level or above                                | 227 | 32.3 (4.2)             | 0.354            | 151   | 28.0 (4.3)             | 0.654            |
| No qualifications                               | 198 | 26.3 (4.6)             |                  | 192   | 24.7 (5.6)             |                  |

\* P-values are for comparison across groups with respect to hearing aid use ( $\chi^2$  test).

<sup>†</sup> Moderate loss: >35 to 54dBHL (tone not heard at 35dBHL, but tone heard at 55 and 75dBHL).

<sup>‡</sup> Moderately severe or severe loss: >55dBHL (tone not heard at 35 and 55dBHL, but may or may not have heard the tone at 75dBHL).

## Reference List

- (1) Lin FR, Yaffe K, Xia J, Xue QL, Harris TB, Purchase-Helzner E et al. Hearing loss and cognitive decline in older adults. *JAMA Intern Med* 2013; 173(4):293-299.
- (2) Lin FR, Metter EJ, O'Brien RJ, Resnick SM, Zonderman AB, Ferrucci L. Hearing loss and incident dementia. *Arch Neurol* 2011; 68(2):214-220.
- (3) Surprenant AM, DiDonato R. Community-dwelling older adults with hearing loss experience greater decline in cognitive function over time than those with normal hearing. *Evid Based Nurs* 2014;17(2):60-1.
- (4) World Health Organization. Prevention of noise-induced hearing loss. 1997.
- (5) Olusanya BO, Neumann KJ, Saunders JE. The global burden of disabling hearing impairment: a call to action. *Bull World Health Organ* 2014; 92(5):367-373.
- (6) Agrawal Y, Platz EA, Niparko JK. Prevalence of hearing loss and differences by demographic characteristics among US adults: data from the National Health and Nutrition Examination Survey, 1999-2004. *Arch Intern Med* 2008; 168(14):1522-1530.
- (7) Stevens G, Flaxman S, Brunskill E, Mascarenhas M, Mathers CD, Finucane M. Global and regional hearing impairment prevalence: an analysis of 42 studies in 29 countries. *Eur J Public Health* 2013; 23(1):146-152.
- (8) Hoffman HJ, Dobie RA, Losonczy KG, Themann CL, Flamme GA. Declining Prevalence of Hearing Loss in US Adults Aged 20 to 69 Years. *JAMA Otolaryngol Head Neck Surg* 2016.
- (9) Helvik AS, Krokstad S, Tambs K. Socioeconomic inequalities in hearing loss in a healthy population sample: The HUNT Study. *Am J Public Health* 2009; 99(8):1376-1378.
- (10) Peracino A, Pecorelli S. The Epidemiology of Cognitive Impairment in the Aging Population: Implications for Hearing Loss. *Audiol Neurootol* 2016; 21 Suppl 1:3-9.
- (11) Davis AC. The prevalence of hearing impairment and reported hearing disability among adults in Great Britain. *Int J Epidemiol* 1989; 18(4):911-917.
- (12) Davis A. Hearing in adults. London: Whurr; 1995.
- (13) Mindell J, Biddulph JP, Hirani V, Stamatakis E, Craig R, Nunn S et al. Cohort profile: the health survey for England. *Int J Epidemiol* 2012; 41(6):1585-1593.
- (14) Parving A, Sorup Sorensen M, Christensen B, Davis A. Evaluation of a hearing screener. *Audiological Medicine* 2008; 6(2):115-119.
- (15) Fellizar-Lopez KR, Abes GT, Reyes-Quintos M, Rina T, Tantoco M, Leah S. Accuracy of Siemens HearCheck Navigator as a Screening Tool for Hearing Loss. *Philippine Journal of Otolaryngology Head and Neck Surgery* 2011; 26(1):10-15.

- 1  
2  
3  
4  
5  
6  
7  
8  
9  
10  
11  
12  
13  
14  
15  
16  
17  
18  
19  
20  
21  
22  
23  
24  
25  
26  
27  
28  
29  
30  
31  
32  
33  
34  
35  
36  
37  
38  
39  
40  
41  
42  
43  
44  
45  
46  
47  
48  
49  
50  
51  
52  
53  
54  
55  
56  
57  
58  
59  
60
- (16) Scholes S, Mindell J. Hearing. In: Craig R, Mindell J, editors. Health Survey for England 2014 Volume 1 Health, social care and lifestyles. Leeds: Health and Social Care Information Centre; 2016.
  - (17) Davis A, Smith P, Ferguson M, Stephens D, Gianopoulos I. Acceptability, benefit and costs of early screening for hearing disability: a study of potential screening tests and models. *Health Technol Assess* 2007; 11(42):1-294.
  - (18) Office for National Statistics. Population estimates for UK, England and Wales, Scotland and Northern Ireland: mid-2014 and mid-2013. 2015.
  - (19) Department for Communities and Local Government. The English Indices of deprivation 2010. 2011. London, Department for Communities and Local Government.
  - (20) Fischer ME, Schubert CR, Nondahl DM, Dalton DS, Huang GH, Keating BJ et al. Subclinical atherosclerosis and increased risk of hearing impairment. *Atherosclerosis* 2015; 238(2):344-349.
  - (21) Kim MB, Zhang Y, Chang Y, Ryu S, Choi Y, Kwon MJ et al. Diabetes mellitus and the incidence of hearing loss: a cohort study. *Int J Epidemiol* 2016.
  - (22) Scholes S, Bridges S, Ng FL, Mindell JS. Comparison of the Physical Activity and Sedentary Behaviour Assessment Questionnaire and the Short-Form International Physical Activity Questionnaire: An Analysis of Health Survey for England Data. *PLoS One* 2016; 11(3):e0151647.
  - (23) Roth TN, Hanebuth D, Probst R. Prevalence of age-related hearing loss in Europe: a review. *Eur Arch Otorhinolaryngol* 2011; 268(8):1101-1107.
  - (24) World Health Organization. Prevention of blindness and deafness. Grades of hearing impairment. 2013.
  - (25) World Health Organization. Global estimates on prevalence of hearing loss. 2012.
  - (26) Goman AM, Lin FR. Prevalence of Hearing Loss by Severity in the United States. *Am J Public Health* 2016; 106(10):1820-1822.
  - (27) Emmett SD, Francis HW. The socioeconomic impact of hearing loss in U.S. adults. *Otol Neurotol* 2015; 36(3):545-550.
  - (28) Cruickshanks KJ, Wiley TL, Tweed TS, Klein BE, Klein R, Mares-Perlman JA et al. Prevalence of hearing loss in older adults in Beaver Dam, Wisconsin. The Epidemiology of Hearing Loss Study. *Am J Epidemiol* 1998; 148(9):879-886.
  - (29) Cruickshanks KJ, Nondahl DM, Tweed TS, Wiley TL, Klein BE, Klein R et al. Education, occupation, noise exposure history and the 10-yr cumulative incidence of hearing impairment in older adults. *Hear Res* 2010; 264(1-2):3-9.
  - (30) Dawes P, Fortnum H, Moore DR, Emsley R, Norman P, Cruickshanks K et al. Hearing in middle age: a population snapshot of 40- to 69-year olds in the United Kingdom. *Ear Hear* 2014; 35(3):e44-e51.
  - (31) Rigtters SC, Metselaar M, Wieringa MH, Baatenburg de Jong RJ, Hofman A, Goedegebure A. Contributing Determinants to Hearing Loss in Elderly Men and Women: Results from the Population-Based Rotterdam Study. *Audiol Neurootol* 2016; 21 Suppl 1:10-15.

- 1  
2  
3  
4  
5  
6  
7  
8  
9  
10  
11  
12  
13  
14  
15  
16  
17  
18  
19  
20  
21  
22  
23  
24  
25  
26  
27  
28  
29  
30  
31  
32  
33  
34  
35  
36  
37  
38  
39  
40  
41  
42  
43  
44  
45  
46  
47  
48  
49  
50  
51  
52  
53  
54  
55  
56  
57  
58  
59  
60
- (32) Agrawal Y, Platz EA, Niparko JK. Risk factors for hearing loss in US adults: data from the National Health and Nutrition Examination Survey, 1999 to 2002. *Otol Neurotol* 2009; 30(2):139-145.
- (33) Davis AC, Ecob R, Smith P. The relationship between work-based noise over the adult life course and hearing in middle age. *Int J Audiol* 2008; 47:100-108.
- (34) Chien W, Lin FR. Prevalence of hearing aid use among older adults in the United States. *Arch Intern Med* 2012; 172(3):292-293.
- (35) Bainbridge KE, Ramachandran V. Hearing aid use among older U.S. adults; the national health and nutrition examination survey, 2005-2006 and 2009-2010. *Ear Hear* 2014; 35(3):289-294.
- (36) Helvik AS, Krokstad S, Tambs K. How sociodemographic and hearing related factors were associated with use of hearing aid in a population-based study: The HUNT Study. *BMC Ear Nose Throat Disord* 2016; 16:8.
- (37) Nieman CL, Marrone N, Szanton SL, Thorpe RJ, Jr., Lin FR. Racial/Ethnic and Socioeconomic Disparities in Hearing Health Care Among Older Americans. *J Aging Health* 2016; 28(1):68-94.
- (38) Davis AC. Epidemiological profile of hearing impairments: the scale and nature of the problem with special reference to the elderly. *Acta Otolaryngol Suppl* 1990; 476:23-31.
- (39) Lutman M, Davis AC, Ferguson M. Epidemiological evidence for the effectiveness of the noise at work regulations. 2008. Health and Safety Executive.
- (40) Horikawa C, Kodama S, Tanaka S, Fujihara K, Hirasawa R, Yachi Y et al. Diabetes and risk of hearing impairment in adults: a meta-analysis. *J Clin Endocrinol Metab* 2013; 98(1):51-58.
- (41) Gates GA, Cobb JL, D'Agostino RB, Wolf PA. The relation of hearing in the elderly to the presence of cardiovascular disease and cardiovascular risk factors. *Arch Otolaryngol Head Neck Surg* 1993; 119(2):156-161.
- (42) Frisina ST, Mapes F, Kim S, Frisina DR, Frisina RD. Characterization of hearing loss in aged type II diabetics. *Hear Res* 2006; 211(1-2):103-113.
- (43) Helzner EP, Contrera KJ. Type 2 Diabetes and Hearing Impairment. *Curr Diab Rep* 2016; 16(1):3.
- (44) Knudsen LV, Oberg M, Nielsen C, Naylor G, Kramer SE. Factors influencing help seeking, hearing aid uptake, hearing aid use and satisfaction with hearing aids: a review of the literature. *Trends Amplif* 2010; 14(3):127-154.
- (45) Capewell S, Graham H. Will cardiovascular disease prevention widen health inequalities? *PLoS Med* 2010; 7(8):e1000320.
- (46) Chatterji P, Joo H, Lahiri K. EXAMINING THE EDUCATION GRADIENT IN CHRONIC ILLNESS. *Educ Econ* 2015; 23(6):735-750.
- (47) Johnston DW, Propper C, Shields MA. Comparing subjective and objective measures of health: Evidence from hypertension for the income/health gradient. *J Health Econ* 2009; 28(3):540-552.

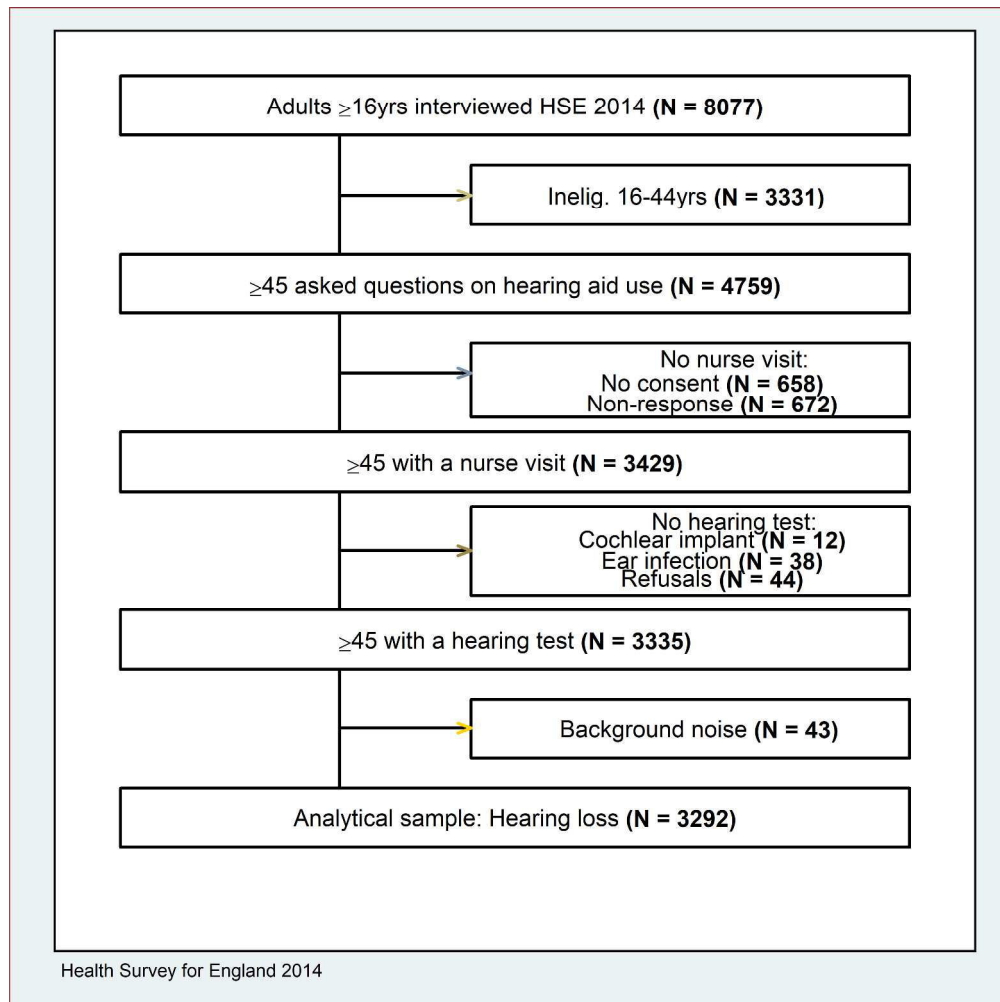

Selection of Study Participants, Health Survey for England 2014

338x338mm (300 x 300 DPI)

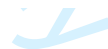

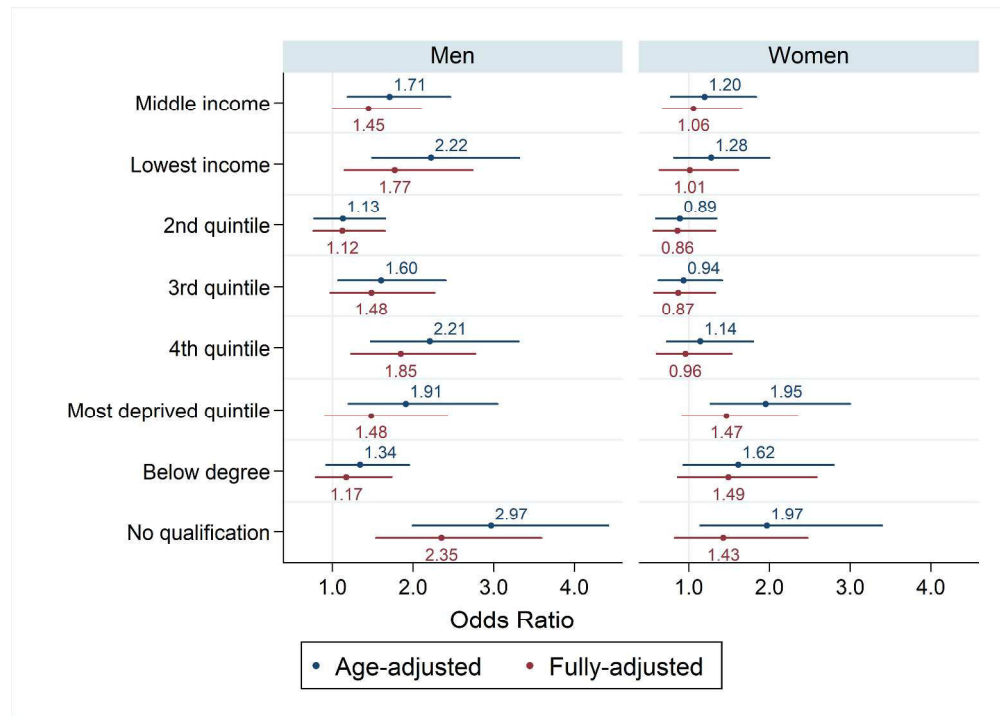

Associations between socioeconomic status and hearing loss in middle-aged and older adults.

Indicators of SES were: equivalised household income tertiles (highest tertile as reference), Index of Multiple Deprivation quintiles (most affluent), and highest educational attainment (degree or higher). Lines represent Odds Ratio (outcome = hearing loss) and its 95% confidence interval. Model A: adjusted for age.

Model B: adjusted for: age, exposure to work-related noise, region, and CVD risk factors (smoking, body mass index, diabetes, hypertension, dyslipidaemia, and physical inactivity).

350x250mm (300 x 300 DPI)

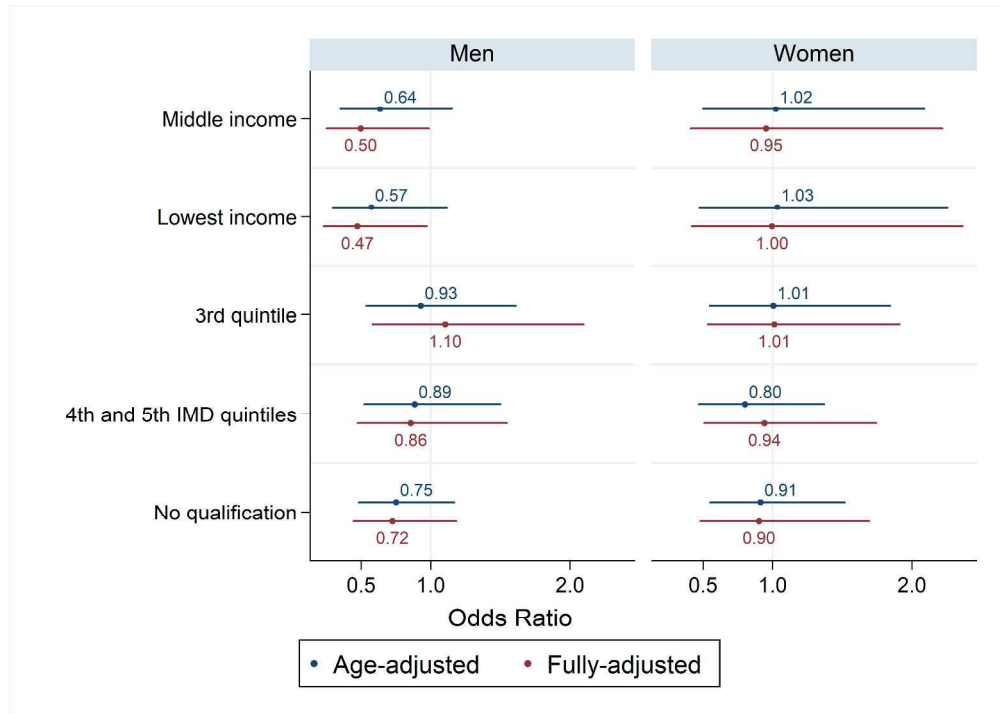

Associations between socioeconomic status and current hearing aid use in middle-aged and older adults with hearing loss.

Indicators of SES were: equivalised household income tertiles (highest tertile as reference), Index of Multiple Deprivation quintiles (least deprived Q1 and Q2), and highest educational attainment (O level or above). Lines represent Odds Ratio (outcome = hearing aid use) and its 95% confidence interval. Model A: adjusted for age. Model B: adjusted for: age, severity of hearing loss, exposure to work-related noise, region, and CVD risk factors (smoking, body mass index, diabetes, hypertension, dyslipidaemia, and physical inactivity).

350x250mm (300 x 300 DPI)

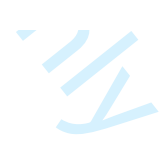



1  
2  
3  
4  
5  
6  
7  
8  
9  
10  
11  
12  
13  
14  
15  
16  
17  
18  
19  
20  
21  
22  
23  
24  
25  
26  
27  
28  
29  
30  
31  
32  
33  
34  
35  
36  
37  
38  
39  
40  
41  
42  
43  
44  
45  
46  
47  
48  
49  
50  
51  
52  
53  
54  
55  
56  
57  
58  
59  
60

**Supplementary Tables**

Scholes S, Biddulph J, Davis AC and Mindell JS. Socioeconomic differences in hearing among middle-aged and older adults: cross-sectional analyses using the Health Survey for England. *Submitted to BMJ Open*.

For peer review only

**Supplementary Table 1** Characteristics of participants aged 45+ with main interview with and without nurse visit

|                                           | No nurse visit | Nurse visit  | P-value |
|-------------------------------------------|----------------|--------------|---------|
| <b>N</b>                                  | <b>1,330</b>   | <b>3,429</b> |         |
| <b>Age in years: mean (SD)</b>            | 62.4 (12.4)    | 63.0 (11.7)  | 0.129   |
| <b>Age (%):</b>                           |                |              |         |
| 45-54                                     | 34.7           | 29.8         | <0.001  |
| 55-64                                     | 24.7           | 25.7         |         |
| 65-74                                     | 20.8           | 26.6         |         |
| 75+                                       | 19.8           | 18.0         |         |
| <b>Sex (%):</b>                           |                |              |         |
| Males                                     | 46.2           | 45.1         | 0.502   |
| Females                                   | 53.8           | 54.9         |         |
| <b>Region (%):</b>                        |                |              |         |
| North                                     | 37.3           | 31.7         | <0.001  |
| Midlands                                  | 27.0           | 30.6         |         |
| London                                    | 11.0           | 8.0          |         |
| South                                     | 24.7           | 29.8         |         |
| <b>Occupational noise exposure (%):</b>   |                |              |         |
| None                                      | 71.9           | 69.3         | 0.004   |
| Less than 5 years                         | 7.7            | 10.9         |         |
| 5 years or more                           | 20.4           | 19.8         |         |
| Missing (n=16)                            |                |              |         |
| <b>Income tertiles (%):</b>               |                |              |         |
| Highest                                   | 35.2           | 35.5         | 0.002   |
| Middle                                    | 32.3           | 37.5         |         |
| Lowest                                    | 32.4           | 27.0         |         |
| Missing (n=1013)                          |                |              |         |
| <b>Index of Multiple Deprivation (%):</b> |                |              |         |
| Least deprived                            | 19.9           | 24.5         | <0.001  |
| 2 <sup>nd</sup>                           | 22.0           | 22.5         |         |
| 3 <sup>rd</sup>                           | 18.4           | 21.3         |         |
| 4 <sup>th</sup>                           | 19.3           | 17.6         |         |
| Most deprived                             | 20.3           | 14.1         |         |
| <b>Education (%):</b>                     |                |              |         |
| Degree                                    | 17.3           | 19.7         | <0.001  |
| Below degree                              | 46.2           | 50.8         |         |
| No qualifications                         | 36.6           | 29.5         |         |
| Missing (n=23)                            |                |              |         |
| <b>Smoking status (%):</b>                |                |              |         |
| Never                                     | 52.4           | 54.1         | 0.011   |
| Former                                    | 30.6           | 32.3         |         |
| Current                                   | 17.0           | 13.6         |         |
| Missing (n=15)                            |                |              |         |
| <b>BMI (%):</b>                           |                |              |         |
| Normal                                    | 25.1           | 27.6         | 0.291   |
| Overweight                                | 42.4           | 41.2         |         |
| Obese                                     | 32.6           | 31.2         |         |

|    |                                       |      |      |        |
|----|---------------------------------------|------|------|--------|
| 1  |                                       |      |      |        |
| 2  |                                       |      |      |        |
| 3  | Missing ( <i>n</i> =691)              |      |      |        |
| 4  | <b>Doctor-diagnosed diabetes (%):</b> |      |      |        |
| 5  | No                                    | 89.5 | 89.6 | 0.886  |
| 6  | Yes                                   | 10.5 | 10.4 |        |
| 7  | Missing ( <i>n</i> =1)                |      |      |        |
| 8  | <b>Hearing difficulty (%):</b>        |      |      |        |
| 9  | None                                  | 68.7 | 60.4 | <0.001 |
| 10 | Slight                                | 15.5 | 22.9 |        |
| 11 | Moderate                              | 7.6  | 8.8  |        |
| 12 | Great                                 | 8.3  | 8.0  |        |
| 13 | Missing ( <i>n</i> =26)               |      |      |        |
| 14 | <b>Hearing aid use (%):</b>           |      |      |        |
| 15 | Current                               | 10.1 | 9.5  | 0.748  |
| 16 | Used but not nowadays                 | 3.1  | 3.3  |        |
| 17 | Never used                            | 86.8 | 87.2 |        |
| 18 | Missing ( <i>n</i> =9)                |      |      |        |
| 19 |                                       |      |      |        |

Abbreviations: BMI: body mass index; SD: standard deviation

Notes: Analysis is unweighted. Data are presented as mean and standard deviation (SD) for continuous variables; and as the column (%) for categorical variables. *P*-values are based on t-test for continuous variables and the chi-square test  $\chi^2$  for categorical variables (excluding missing data on covariates).

**Supplementary Table 2** Age-standardised prevalence (%) and standard error (SE) of hearing loss, persons aged 45 years and over, HSE 2014

| Characteristics             | Males |                      |                  |                            |          | Females |                      |                  |                            |          |
|-----------------------------|-------|----------------------|------------------|----------------------------|----------|---------|----------------------|------------------|----------------------------|----------|
|                             | n     | Hearing loss % (SE)* | Moderate % (SE)† | Moderate to severe % (SE)‡ | P-value§ | n       | Hearing loss % (SE)* | Moderate % (SE)† | Moderate to severe % (SE)‡ | P-value§ |
| <b>Region:</b>              |       |                      |                  |                            |          |         |                      |                  |                            |          |
| North                       | 485   | 26.7 (2.1)           | 14.9 (1.7)       | 11.8 (1.6)                 | 0.618    | 556     | 20.2 (1.6)           | 13.0 (1.4)       | 7.2 (1.1)                  | 0.322    |
| Midlands                    | 454   | 28.0 (2.1)           | 16.9 (1.6)       | 11.1 (1.7)                 |          | 558     | 21.6 (1.7)           | 13.0 (1.4)       | 8.6 (1.2)                  |          |
| London                      | 113   | 21.9 (5.1)           | 14.1 (4.0)       | 7.8 (3.6)                  |          | 142     | 15.6 (3.5)           | 9.4 (2.8)        | 6.2 (2.5)                  |          |
| South                       | 433   | 25.4 (2.3)           | 14.0 (1.8)       | 11.4 (1.6)                 |          | 551     | 18.1 (1.8)           | 11.3 (1.3)       | 6.8 (1.2)                  |          |
| <b>Smoking status:</b>      |       |                      |                  |                            |          |         |                      |                  |                            |          |
| Never smoked                | 709   | 24.9 (1.8)           | 14.0 (1.4)       | 10.9 (1.3)                 | 0.102    | 1083    | 19.1 (1.3)           | 11.5 (1.0)       | 7.6 (0.9)                  | 0.290    |
| Ex-regular                  | 559   | 26.0 (1.9)           | 15.1 (1.5)       | 10.9 (1.2)                 |          | 494     | 17.6 (1.6)           | 11.0 (1.3)       | 6.6 (1.1)                  |          |
| Current smoker              | 217   | 32.9 (4.1)           | 17.1 (3.1)       | 15.8 (3.8)                 |          | 230     | 23.0 (3.4)           | 14.9 (2.8)       | 8.1 (2.6)                  |          |
| <b>BMI:</b>                 |       |                      |                  |                            |          |         |                      |                  |                            |          |
| Normal                      | 297   | 27.1 (3.2)           | 16.3 (2.4)       | 10.8 (2.4)                 | 0.529    | 535     | 15.6 (1.7)           | 7.3 (1.1)        | 8.4 (1.4)                  | 0.135    |
| Overweight                  | 658   | 24.0 (1.7)           | 13.6 (1.4)       | 10.4 (1.1)                 |          | 565     | 20.3 (1.7)           | 13.0 (1.5)       | 7.4 (1.1)                  |          |
| Obese                       | 401   | 26.9 (2.2)           | 16.4 (1.8)       | 10.5 (1.7)                 |          | 519     | 19.7 (1.9)           | 15.0 (1.7)       | 4.6 (1.1)                  |          |
| <b>Diagnosed diabetes:</b>  |       |                      |                  |                            |          |         |                      |                  |                            |          |
| No                          | 1294  | 24.2 (1.3)           | 13.7 (1.0)       | 10.6 (1.0)                 | <0.001   | 1652    | 18.4 (1.0)           | 11.0 (0.8)       | 7.4 (0.7)                  | 0.005    |
| Yes                         | 191   | 40.4 (3.9)           | 26.2 (3.5)       | 14.2 (2.5)                 |          | 154     | 28.8 (4.0)           | 21.2 (3.7)       | 7.6 (1.9)                  |          |
| <b>Raised Hb1Ac:</b>        |       |                      |                  |                            |          |         |                      |                  |                            |          |
| No                          | 981   | 23.6 (1.4)           | 13.1 (1.1)       | 10.6 (1.1)                 | <0.001   | 1189    | 17.9 (1.2)           | 10.7 (0.9)       | 7.2 (0.9)                  | 0.025    |
| Yes                         | 140   | 39.8 (4.3)           | 25.5 (4.0)       | 14.3 (2.9)                 |          | 114     | 27.1 (4.4)           | 17.0 (3.6)       | 10.1 (3.0)                 |          |
| <b>Hypertension:</b>        |       |                      |                  |                            |          |         |                      |                  |                            |          |
| No                          | 630   | 27.7 (2.0)           | 17.4 (1.7)       | 10.3 (1.6)                 | 0.752    | 906     | 18.6 (1.6)           | 11.7 (1.3)       | 6.9 (1.1)                  | 0.133    |
| Yes                         | 640   | 26.8 (1.9)           | 14.5 (1.5)       | 12.4 (1.3)                 |          | 707     | 22.0 (1.6)           | 13.8 (1.3)       | 8.2 (1.0)                  |          |
| <b>Dyslipidaemia:</b>       |       |                      |                  |                            |          |         |                      |                  |                            |          |
| No                          | 483   | 29.7 (2.3)           | 17.0 (2.0)       | 12.7 (1.5)                 | 0.031    | 389     | 22.0 (2.1)           | 13.5 (1.7)       | 8.5 (1.5)                  | 0.098    |
| Yes                         | 637   | 23.2 (2.1)           | 13.2 (1.5)       | 10.0 (1.7)                 |          | 915     | 17.8 (1.5)           | 10.9 (1.2)       | 6.8 (1.0)                  |          |
| <b>Physically inactive:</b> |       |                      |                  |                            |          |         |                      |                  |                            |          |
| No                          | 838   | 24.1 (1.7)           | 14.3 (1.3)       | 9.9 (1.3)                  | 0.180    | 875     | 16.0 (1.5)           | 10.8 (1.3)       | 5.2 (1.0)                  | 0.028    |
| Yes                         | 437   | 27.7 (2.2)           | 16.0 (1.7)       | 11.7 (1.5)                 |          | 649     | 20.9 (1.6)           | 13.4 (1.3)       | 7.4 (1.0)                  |          |

1  
2  
3  
4  
5  
6  
7  
8  
9  
10  
11  
12  
13  
14  
15  
16  
17  
18  
19  
20  
21  
22  
23  
24  
25  
26  
27  
28  
29  
30  
31  
32  
33  
34  
35  
36  
37  
38  
39  
40  
41  
42  
43  
44  
45  
46  
47

- \* Hearing loss:  $\geq 35$ dBHL at 3.0 kHz (tone not heard at 35dBHL).
- † Moderate loss:  $>35$  to 54dBHL (tone not heard at 35dBHL, but heard at 55 and at 75dBHL).
- ‡ Moderately severe or severe loss:  $>55$  dBHL (tone not heard at 35 and at 55dBHL, but may or may not have heard the tone at 75dBHL).
- § P-values are for comparison across groups with respect to hearing loss ( $\chi^2$  test)

For peer review only

1  
2  
3  
4  
5  
6  
7  
8  
9  
10  
11  
12  
13  
14  
15  
16  
17  
18  
19  
20  
21  
22  
23  
24  
25  
26  
27  
28  
29  
30  
31  
32  
33  
34  
35  
36  
37  
38  
39  
40  
41  
42  
43  
44  
45  
46  
47

For peer review only

6

**Supplementary Table 3** Age-standardized prevalence (%) and standard error (SE) of hearing aid use among persons with hearing loss, persons aged 45 years and over, HSE 2014

|                             | Men |                        |                  | Women |                        |                  |
|-----------------------------|-----|------------------------|------------------|-------|------------------------|------------------|
|                             | N   | Hearing aid use % (SE) | <i>P</i> -value* | N     | Hearing aid use % (SE) | <i>P</i> -value* |
| <b>Smoking status:</b>      |     |                        |                  |       |                        |                  |
| Never smoked                | 182 | 35.3 (4.1)             | 0.452            | 202   | 32.7 (4.2)             | 0.849            |
| Ex-regular                  | 189 | 28.4 (3.8)             |                  | 96    | 31.1 (5.9)             |                  |
| Current smoker              | 54  | 27.5 (7.6)             |                  | 46    | 27.4 (8.0)             |                  |
| <b>BMI:</b>                 |     |                        |                  |       |                        |                  |
| Normal                      | 72  | 27.2 (6.7)             | 0.789            | 72    | 36.2 (8.1)             | 0.362            |
| Overweight                  | 181 | 30.7 (5.5)             |                  | 112   | 23.5 (4.9)             |                  |
| Obese                       | 113 | 33.5 (5.5)             |                  | 90    | 25.9 (6.0)             |                  |
| <b>Diagnosed diabetes:</b>  |     |                        |                  |       |                        |                  |
| No                          | 338 | 32.5 (3.6)             | 0.101            | 287   | 29.6 (3.8)             | 0.077            |
| Yes                         | 87  | 20.5 (5.6)             |                  | 56    | 13.5 (6.4)             |                  |
| <b>Raised Hb1Ac:</b>        |     |                        |                  |       |                        |                  |
| No                          | 234 | 30.2 (4.0)             | 0.510            | 184   | 31.4 (4.5)             | 0.194            |
| Yes                         | 62  | 24.3 (7.5)             |                  | 35    | 17.4 (8.3)             |                  |
| <b>Hypertension:</b>        |     |                        |                  |       |                        |                  |
| No                          | 159 | 30.7 (4.6)             | 0.761            | 113   | 30.1 (5.2)             | 0.803            |
| Yes                         | 223 | 28.7 (4.8)             |                  | 201   | 28.4 (4.9)             |                  |
| <b>Dyslipidaemia:</b>       |     |                        |                  |       |                        |                  |
| No                          | 172 | 29.0 (4.8)             | 0.910            | 88    | 24.7 (7.6)             | 0.584            |
| Yes                         | 126 | 28.2 (5.2)             |                  | 132   | 29.8 (4.9)             |                  |
| <b>Physically inactive:</b> |     |                        |                  |       |                        |                  |
| No                          | 182 | 30.3 (4.5)             | 0.628            | 99    | 36.6 (5.6)             | 0.003            |
| Yes                         | 162 | 26.8 (5.4)             |                  | 162   | 15.8 (3.9)             |                  |

\* P-values are for comparison across groups with respect to hearing aid use ( $\chi^2$  test).

## STROBE Statement—checklist of items that should be included in reports of observational studies

Scholes S, Biddulph J, Davis AC, Mindell JS. Socioeconomic differences in hearing among middle-aged and older adults: cross-sectional analyses using the Health Survey for England. Submitted to BMJ Open.

|   |                         | <b>Recommendation</b>                                                                                                                                                            | <b>Author response</b>                                                                                                                                                                                                                                                                        |
|---|-------------------------|----------------------------------------------------------------------------------------------------------------------------------------------------------------------------------|-----------------------------------------------------------------------------------------------------------------------------------------------------------------------------------------------------------------------------------------------------------------------------------------------|
| 1 | <b>Title / abstract</b> | (a) Indicate the study's design with a commonly used term in the title or the abstract                                                                                           | Yes. The title of our submitted manuscript is: "Socioeconomic differences in hearing among middle-aged and older adults: <b>cross-sectional analyses</b> using the Health Survey for England".                                                                                                |
|   |                         | (b) Provide in the abstract an informative and balanced summary of what was done and what was found                                                                              | Yes                                                                                                                                                                                                                                                                                           |
| 2 | <b>Introduction</b>     | Explain the scientific background and rationale for the investigation being reported                                                                                             | Yes. The background and rationale for our study are outlined in the Introduction (1 <sup>st</sup> and 2 <sup>nd</sup> paragraphs, respectively).                                                                                                                                              |
| 3 |                         | State specific objectives, including any prespecified hypotheses                                                                                                                 | Yes. The primary and secondary aims are outlined in the second paragraph of the Introduction. We did not have any pre-specified hypotheses.                                                                                                                                                   |
| 4 | Methods                 | <i>Study design</i> : Present key elements of study design early in the paper                                                                                                    | Yes. The first sentence of the Methods Section states that the present study uses data from the Health Survey for England, an annual nationally-representative cross-sectional survey of the non-institutionalised general population.                                                        |
| 5 |                         | <i>Setting</i> : Describe the setting, locations, and relevant dates, including periods of recruitment, exposure, follow-up, and data collection                                 | Yes. The study setting is outlined in the first paragraph of the Methods Section.                                                                                                                                                                                                             |
| 6 |                         | <i>Participants (cross-sectional study)</i> : Give the eligibility criteria, and the sources and methods of selection of participants                                            | Yes. The participants in this study (including eligibility criteria) are described in the 1 <sup>st</sup> and 2 <sup>nd</sup> paragraphs of the Methods section. Figure 1 is a flowchart which shows the derivation of the analytical sample used to estimate the prevalence of hearing loss. |
| 7 |                         | <i>Variables</i> : Clearly define all outcomes, exposures, predictors, potential confounders, and effect modifiers. Give diagnostic criteria, if applicable                      | Yes. The key variables for this study (hearing outcomes; markers of socioeconomic status (SES), and various potential confounders of the SES-hearing associations) are clearly defined under the appropriate heading (hearing loss, socioeconomic status, and covariates)                     |
| 8 |                         | <i>Data sources / measurement</i> : For each variable of interest, give sources of data and details of methods of assessment (measurement). Describe comparability of assessment | Yes, sources of details and methods of assessment are outlined under the appropriate heading (hearing loss, socioeconomic status, and covariates).                                                                                                                                            |



|    |                |                                                                                                                                                                                                                                                                                                                                                                                                     |                                                                                                                                                                                                                                                                                                                                                                                                                                                                                                                                                                                                                                                                                                                                                                                                                                                                                                                                                                |
|----|----------------|-----------------------------------------------------------------------------------------------------------------------------------------------------------------------------------------------------------------------------------------------------------------------------------------------------------------------------------------------------------------------------------------------------|----------------------------------------------------------------------------------------------------------------------------------------------------------------------------------------------------------------------------------------------------------------------------------------------------------------------------------------------------------------------------------------------------------------------------------------------------------------------------------------------------------------------------------------------------------------------------------------------------------------------------------------------------------------------------------------------------------------------------------------------------------------------------------------------------------------------------------------------------------------------------------------------------------------------------------------------------------------|
|    |                | methods if there is more than one group                                                                                                                                                                                                                                                                                                                                                             |                                                                                                                                                                                                                                                                                                                                                                                                                                                                                                                                                                                                                                                                                                                                                                                                                                                                                                                                                                |
| 9  |                | <i>Bias</i> Describe any efforts to address potential sources of bias                                                                                                                                                                                                                                                                                                                               | We discussed the potential source of bias through missing data as a result of: (1) survey non-response (main interview and nurse visit); and (2) interviewer-participant communication difficulties through conditions such as deafness. The appropriate non-response weights archived with the data were used in all analyses.<br><br>Potential bias arising from both potential sources of missing data is discussed in the section on Study limitations (see Checklist Item No. 19).                                                                                                                                                                                                                                                                                                                                                                                                                                                                        |
| 10 |                | <i>Study size:</i> Explain how the study size was arrived at.                                                                                                                                                                                                                                                                                                                                       | Yes, Figure 1 shows the derivation of the analytical sample. We explain in the Methods section that participants aged 16-44 years were excluded due to hearing loss being comparatively rare. We explain that the analysis of hearing aid use was carried out only on the subset of participants with hearing loss.                                                                                                                                                                                                                                                                                                                                                                                                                                                                                                                                                                                                                                            |
| 11 |                | Quantitative variables: Explain how quantitative variables were handled in the analyses. If applicable, describe which groupings were chosen and why                                                                                                                                                                                                                                                | Yes.                                                                                                                                                                                                                                                                                                                                                                                                                                                                                                                                                                                                                                                                                                                                                                                                                                                                                                                                                           |
| 12 |                | <i>Statistical methods:</i> (a) Describe all statistical methods, including those used to control for confounding; (b) Describe any methods used to examine subgroups and interactions; (c) Explain how missing data were addressed; (d) <i>Cross-sectional study</i> —If applicable, describe analytical methods taking account of sampling strategy; (e) <i>Describe any sensitivity analyses</i> | (a) Yes. Firstly, prevalence estimates across subgroups were age-standardised within sex to the 2014 English household population. Secondly, a fully-adjusted model was used to examine the SES-hearing associations. Potential confounders adjusted for in the modelling included age, duration of work-related exposure, and CVD risk factors. Severity of hearing loss was adjusted for in the analysis of hearing aid use.<br><br>(b) Yes, the chi-square test was used to test subgroup differences in hearing outcomes.<br><br>(c) <i>Missing data:</i> analyses were weighted by the nurse-visit weight: this accounts for individual non-participation and preserves the national representativeness of the sample.<br><br>(d) <i>Sampling strategy:</i> the weighting and clustering of participants within PSUs were accounted for by using design-based inference (the complex survey module in Stata).<br><br>(e) <i>Sensitivity analyses:</i> N/A |
| 13 | <b>Results</b> | <i>Participants:</i> (a) Report numbers of individuals at each stage of study—eg numbers potentially eligible, examined for eligibility, confirmed eligible, included in                                                                                                                                                                                                                            | Yes, Reasons for exclusion at each stage of the study are shown in the flow diagram ( <b>Figure 1</b> ).                                                                                                                                                                                                                                                                                                                                                                                                                                                                                                                                                                                                                                                                                                                                                                                                                                                       |

|    |                   |                                                                                                                                                                                                                                                                                                                                                                                                                                |                                                                                                                                                                                                                                                                                                                                                                                                                                                                                                                                                           |
|----|-------------------|--------------------------------------------------------------------------------------------------------------------------------------------------------------------------------------------------------------------------------------------------------------------------------------------------------------------------------------------------------------------------------------------------------------------------------|-----------------------------------------------------------------------------------------------------------------------------------------------------------------------------------------------------------------------------------------------------------------------------------------------------------------------------------------------------------------------------------------------------------------------------------------------------------------------------------------------------------------------------------------------------------|
|    |                   | the study, completing follow-up, and analysed; (b) Give reasons for non-participation at each stage; (c) Consider use of a flow diagram                                                                                                                                                                                                                                                                                        |                                                                                                                                                                                                                                                                                                                                                                                                                                                                                                                                                           |
| 14 |                   | <i>Descriptive data:</i> (a) Give characteristics of study participants (eg demographic, clinical, social) and information on exposures and potential confounders; (b) Indicate number of participants with missing data for each variable of interest                                                                                                                                                                         | Yes, Supplementary Table 1 shows the characteristics of participants aged 45+ with main interview data with and without nurse visit data (including the number of participants with missing data for each variable of interest).                                                                                                                                                                                                                                                                                                                          |
| 15 |                   | <i>Outcome data:</i> Report numbers of outcome events or summary measures                                                                                                                                                                                                                                                                                                                                                      | Yes, we outline the number of participants with hearing loss (769/3292) and the number of participants with hearing loss reporting current use of a hearing aid (264/769). Prevalence estimates are set out in Table 1 (hearing loss) and Table 2 (current hearing aid use).                                                                                                                                                                                                                                                                              |
| 16 |                   | <i>Main results:</i> (a) Give unadjusted estimates and, if applicable, confounder-adjusted estimates and their precision (eg, 95% confidence interval). Make clear which confounders were adjusted for and why they were included; (b) Report category boundaries when continuous variables were categorized; (c) If relevant, consider translating estimates of relative risk into absolute risk for a meaningful time period | We present odds ratios (and accompanying 95% CIs) for the SES-hearing associations in both age-adjusted and fully-adjusted models in Figures 2 and 3. The estimates are displayed graphically to avoid lengthy tables.<br><br>The legends for Figures 2 and 3 make clear which confounders were adjusted for. In the Methods Section we explain that modifiable risk factors for CVD such as diabetes have been independently associated with hearing impairment and are also possible confounders for any observed associations between SES and hearing. |
| 17 |                   | <i>Other analyses:</i> Report other analyses done—eg analyses of subgroups and interactions, and sensitivity analyses                                                                                                                                                                                                                                                                                                          | Yes, the analysis of current hearing aid use is based on the subset of participants with objectively measured hearing loss.                                                                                                                                                                                                                                                                                                                                                                                                                               |
| 18 | <b>Discussion</b> | <i>Key results:</i> Summarise key results with reference to study objectives                                                                                                                                                                                                                                                                                                                                                   | Yes, we summarise the key results with reference to the study objectives in the first paragraph of the Discussion.                                                                                                                                                                                                                                                                                                                                                                                                                                        |
| 19 |                   | <i>Limitations:</i> Discuss limitations of the study, taking into account sources of potential bias or imprecision. Discuss both direction and magnitude of any potential bias                                                                                                                                                                                                                                                 | Yes, the limitations of the study are outlined in the Discussion. Limitations include missing data (accounted for by the use of non-response weighting), the small number of participants with hearing loss, and the unknown influence of unmeasured confounders. We state that since this study utilises cross-sectional data, we could not establish the direction of the observed associations, and we cannot establish causality.                                                                                                                     |
| 20 |                   | <i>Interpretation:</i> Give a cautious overall interpretation of results considering objectives, limitations, multiplicity of                                                                                                                                                                                                                                                                                                  | Yes, in the Discussion we present a cautious overall interpretation of the main findings.                                                                                                                                                                                                                                                                                                                                                                                                                                                                 |

|    |    |                                                                                                                                                                                                            |                                                                                                          |
|----|----|------------------------------------------------------------------------------------------------------------------------------------------------------------------------------------------------------------|----------------------------------------------------------------------------------------------------------|
| 1  |    | analyses, results from similar studies, and other relevant evidence                                                                                                                                        |                                                                                                          |
| 2  |    |                                                                                                                                                                                                            |                                                                                                          |
| 3  |    |                                                                                                                                                                                                            |                                                                                                          |
| 4  |    |                                                                                                                                                                                                            |                                                                                                          |
| 5  | 21 | <i>Generalisability</i> : Discuss the generalisability (external validity) of the study results                                                                                                            | Yes                                                                                                      |
| 6  |    |                                                                                                                                                                                                            |                                                                                                          |
| 7  |    |                                                                                                                                                                                                            |                                                                                                          |
| 8  | 22 | <b>Other Information</b><br><i>Funding</i> : Give the source of funding and the role of the funders for the present study and, if applicable, for the original study on which the present article is based | The Health Survey for England 2014 was funded by NHS Digital. This particular study received no funding. |
| 9  |    |                                                                                                                                                                                                            |                                                                                                          |
| 10 |    |                                                                                                                                                                                                            |                                                                                                          |
| 11 |    |                                                                                                                                                                                                            |                                                                                                          |
| 12 |    |                                                                                                                                                                                                            |                                                                                                          |
| 13 |    |                                                                                                                                                                                                            |                                                                                                          |
| 14 |    |                                                                                                                                                                                                            |                                                                                                          |
| 15 |    |                                                                                                                                                                                                            |                                                                                                          |
| 16 |    |                                                                                                                                                                                                            |                                                                                                          |
| 17 |    |                                                                                                                                                                                                            |                                                                                                          |
| 18 |    |                                                                                                                                                                                                            |                                                                                                          |
| 19 |    |                                                                                                                                                                                                            |                                                                                                          |
| 20 |    |                                                                                                                                                                                                            |                                                                                                          |
| 21 |    |                                                                                                                                                                                                            |                                                                                                          |
| 22 |    |                                                                                                                                                                                                            |                                                                                                          |
| 23 |    |                                                                                                                                                                                                            |                                                                                                          |
| 24 |    |                                                                                                                                                                                                            |                                                                                                          |
| 25 |    |                                                                                                                                                                                                            |                                                                                                          |
| 26 |    |                                                                                                                                                                                                            |                                                                                                          |
| 27 |    |                                                                                                                                                                                                            |                                                                                                          |
| 28 |    |                                                                                                                                                                                                            |                                                                                                          |
| 29 |    |                                                                                                                                                                                                            |                                                                                                          |
| 30 |    |                                                                                                                                                                                                            |                                                                                                          |
| 31 |    |                                                                                                                                                                                                            |                                                                                                          |
| 32 |    |                                                                                                                                                                                                            |                                                                                                          |
| 33 |    |                                                                                                                                                                                                            |                                                                                                          |
| 34 |    |                                                                                                                                                                                                            |                                                                                                          |
| 35 |    |                                                                                                                                                                                                            |                                                                                                          |
| 36 |    |                                                                                                                                                                                                            |                                                                                                          |
| 37 |    |                                                                                                                                                                                                            |                                                                                                          |
| 38 |    |                                                                                                                                                                                                            |                                                                                                          |
| 39 |    |                                                                                                                                                                                                            |                                                                                                          |
| 40 |    |                                                                                                                                                                                                            |                                                                                                          |
| 41 |    |                                                                                                                                                                                                            |                                                                                                          |
| 42 |    |                                                                                                                                                                                                            |                                                                                                          |
| 43 |    |                                                                                                                                                                                                            |                                                                                                          |
| 44 |    |                                                                                                                                                                                                            |                                                                                                          |
| 45 |    |                                                                                                                                                                                                            |                                                                                                          |
| 46 |    |                                                                                                                                                                                                            |                                                                                                          |
| 47 |    |                                                                                                                                                                                                            |                                                                                                          |
| 48 |    |                                                                                                                                                                                                            |                                                                                                          |
| 49 |    |                                                                                                                                                                                                            |                                                                                                          |
| 50 |    |                                                                                                                                                                                                            |                                                                                                          |
| 51 |    |                                                                                                                                                                                                            |                                                                                                          |
| 52 |    |                                                                                                                                                                                                            |                                                                                                          |
| 53 |    |                                                                                                                                                                                                            |                                                                                                          |
| 54 |    |                                                                                                                                                                                                            |                                                                                                          |
| 55 |    |                                                                                                                                                                                                            |                                                                                                          |
| 56 |    |                                                                                                                                                                                                            |                                                                                                          |
| 57 |    |                                                                                                                                                                                                            |                                                                                                          |
| 58 |    |                                                                                                                                                                                                            |                                                                                                          |
| 59 |    |                                                                                                                                                                                                            |                                                                                                          |
| 60 |    |                                                                                                                                                                                                            |                                                                                                          |

# BMJ Open

## Socioeconomic differences in hearing among middle-aged and older adults: cross-sectional analyses using the Health Survey for England

|                                 |                                                                                                                                                                                                                             |
|---------------------------------|-----------------------------------------------------------------------------------------------------------------------------------------------------------------------------------------------------------------------------|
| Journal:                        | <i>BMJ Open</i>                                                                                                                                                                                                             |
| Manuscript ID                   | bmjopen-2017-019615.R1                                                                                                                                                                                                      |
| Article Type:                   | Research                                                                                                                                                                                                                    |
| Date Submitted by the Author:   | 25-Oct-2017                                                                                                                                                                                                                 |
| Complete List of Authors:       | Scholes, Shaun; UCL, Dept of Epidemiology and Public Health<br>Biddulph, Jane; UCL, Dept of Epidemiology and Public Health<br>Davis, Adrian; UCL, UCL Ear Institute<br>Mindell, Jennifer; UCL, Epidemiology & Public Health |
| <b>Primary Subject Heading</b>: | Ear, nose and throat/otolaryngology                                                                                                                                                                                         |
| Secondary Subject Heading:      | Epidemiology, Public health                                                                                                                                                                                                 |
| Keywords:                       | hearing loss, hearing aids, EPIDEMIOLOGY, social inequalities                                                                                                                                                               |
|                                 |                                                                                                                                                                                                                             |

SCHOLARONE™  
Manuscripts

1  
2  
3 **Socioeconomic differences in hearing among middle-aged and older adults: cross-**  
4 **sectional analyses using the Health Survey for England**  
5

6  
7 Shaun Scholes<sup>1\*</sup>, Jane Biddulph<sup>1</sup>, Adrian Davis<sup>2</sup>, Jennifer S Mindell<sup>1</sup>  
8  
9

10 <sup>1</sup> Department of Epidemiology and Public Health, UCL (University College London),  
11 London, WC1E 6BT, UK  
12

13 <sup>2</sup> UCL Ear Institute, UCL (University College London), London, WC1E 6BT, UK  
14

15 \* Corresponding author: Shaun Scholes, Department of Epidemiology and Public Health,  
16 UCL, 1-19 Torrington Place, London, WC1E 6BT, UK; E-mail: [s.scholes@ucl.ac.uk](mailto:s.scholes@ucl.ac.uk)  
17  
18

19  
20 **Keywords:** hearing loss; hearing aids; surveys; epidemiology; social inequalities  
21  
22  
23  
24  
25  
26  
27  
28  
29  
30  
31  
32  
33  
34  
35  
36  
37  
38  
39  
40  
41  
42  
43  
44  
45  
46  
47  
48  
49  
50  
51  
52  
53  
54  
55  
56  
57  
58  
59  
60

### Strengths and limitations

- Estimates of the burden of hearing loss, the use of hearing aids among persons with hearing loss, and their associations with socioeconomic status, are rarely available from nationally-representative health examination surveys.
- We used data from a screening audiometry device to estimate the prevalence of hearing loss. The prevalence of current hearing aid use was estimated among persons with hearing loss.
- The associations between different markers of socioeconomic status and hearing were examined after adjustment for a wide range of confounders such as age, exposure to work-related noise, and risk factors for cardiovascular disease.
- Exclusion of persons from the study due to difficulties in interviewer-participant communication through conditions such as deafness means that our estimates are likely to underestimate the true prevalence of hearing loss among community-dwelling middle-aged and older adults.

## ABSTRACT

**Background:** Hearing loss impacts on cognitive, social and physical functioning. Both hearing loss and hearing aid use vary across population subgroups. We examined whether hearing loss, and reported current hearing aid use among persons with hearing loss, were associated with different markers of socioeconomic status (SES) in a nationally-representative sample of community-dwelling middle-aged and older adults.

**Methods:** Hearing was measured using an audiometric screening device in the Health Survey for England 2014 (3292 participants aged 45 years and over). Hearing loss was defined as >35dBHL at 3.0 kHz in the better-hearing ear. Using sex-specific logistic regression modelling, we evaluated the associations between SES and hearing after adjustment for potential confounders.

**Results:** 26% of men and 20% of women aged 45 years and over had hearing loss. Hearing loss was higher among men in the lowest SES groups. For example, the multivariable-adjusted odds of hearing loss were almost twice as high for those in the lowest versus the highest income tertile [Odds Ratio (OR): 1.77; 95% CI: 1.15, 2.74]. Among those with hearing loss, 30% of men and 27% of women were currently using a hearing aid. Compared with men in the highest income tertile, the multivariable-adjusted odds of using a hearing aid nowadays were lower for men in the middle (OR: 0.50; 95% CI: 0.25, 0.99) and the lowest (OR: 0.47; 95% CI: 0.23, 0.97) income tertiles. Associations between SES and hearing were weaker or null among women.

**Conclusions:** Whilst the burden of hearing loss fell highest among men in the lowest SES groups, current hearing aid use was demonstrably lower. Initiatives to detect hearing loss early and increase the uptake and the use of hearing aids may provide substantial public health benefits and reduce socioeconomic inequalities in health.

## INTRODUCTION

Hearing loss is well known to impact on cognitive, social and physical functioning.<sup>1-3</sup> It can be congenital, but most is acquired and is sensorineural and irreversible in nature.<sup>4</sup> Preventing hearing loss requires understanding its aetiology and risk factors.<sup>5</sup> Epidemiological studies have shown that hearing loss increases with age<sup>6-8</sup> and increases with the duration of exposure to work-related noise.<sup>8</sup> It is higher among men<sup>6-8</sup>, higher among persons with cardiovascular disease (CVD) risk factors<sup>6,8-11</sup>, and is inversely associated with socioeconomic status (SES).<sup>6-8,12</sup> Early detection and hearing aid use may be effective at ameliorating the impact of hearing loss.<sup>13</sup> However, levels of hearing aid use among persons most likely to benefit are low<sup>14-17</sup>, especially among persons with hearing loss in the lowest SES groups.<sup>14,18-20</sup>

Based on the UK National Study of Hearing conducted in four cities in the early 1980s, 16% of adults aged 17-80 years had a bilateral, and 25% had a unilateral or bilateral, hearing loss.<sup>21</sup> Uptake and use of hearing aids was low, with uptake being 10-30% among persons with hearing loss, and up to 25% of hearing aid owners never using them.<sup>22</sup> To provide up-to-date estimates of the burden of hearing loss, the Health Survey for England (HSE) 2014 included, for the first time in a nationally-representative sample of the population, valid screening audiometry data. The aim of this study was to estimate the prevalence of (1) hearing loss, and (2) current hearing aid use (among persons with hearing loss), in this sample of community-dwelling middle-aged and older adults across population subgroups defined by demographics, work-related noise exposure, and by the presence of CVD risk factors. We also examined the associations between SES and hearing.

## METHODS

### Study population



1  
2  
3 The present study used data from the HSE. The HSE is an annual, nationally-representative  
4 cross-sectional survey of the non-institutionalised general population of all ages. A maximum  
5 of two children per household contributed to the 2014 survey. In households with more than  
6 two children, two were randomly selected using the Kish grid method.<sup>23</sup> Multistage stratified  
7 probability sampling is used with postcode sectors as the primary sampling unit and the  
8 Postcode Address File as the sampling frame for households. Details about the HSE are  
9 described elsewhere.<sup>23</sup> Interview and nurse-visit response rates were 55% and 37%,  
10 respectively. Participants gave verbal consent to be interviewed, visited by a nurse,  
11 participate in a hearing test, and have blood pressure and anthropometric measurements  
12 taken, and gave written consent for blood sampling. Ethical approval was obtained from the  
13 Oxford A Research Ethics Committee (12/SC/0317).

14  
15  
16 Overall, 8077 participants aged 16+ years were interviewed, including questions on the use of  
17 hearing aids (see below). All participants aged 16+ years who had a nurse-visit were eligible  
18 for the hearing test, excluding those with a cochlear implant or with a current ear infection  
19 (Figure 1). Participants aged 16-44 years were excluded due to hearing loss being  
20 comparatively rare ( $n=46$ ). In addition, a number of persons would have been excluded if  
21 interviewer-participant communication difficulties through conditions such as deafness were  
22 sufficient to prevent inclusion in the study. The final analytical sample was 3292 participants.

23  
24  
25  
26  
27  
28  
29  
30  
31  
32  
33  
34  
35  
36  
37  
38  
39  
40  
41  
42  
43  
44  
45  
46  
47  
48  
49  
50  
51  
52  
53  
54  
55  
56  
57  
58  
59  
60  
*(Figure 1 here)*

### **Hearing test**

Hearing was measured using an audiometric screening device (HearCheck screener, Siemens, Erlangen, Germany) in participants' own homes. Two evaluation studies comparing the results of the screener to pure tone audiometry showed good sensitivity (range: 78% to 92%) and acceptable to good specificity (62% to 95%).<sup>24;25</sup> This handheld device produced a series

1  
2  
3 of three sounds of decreasing volume at 1.0 kHz (55dBHL, 35dBHL and 20dBHL) and then  
4  
5 at 3.0 kHz (75dBHL, 55dBHL and 35dBHL). Both ears were tested, starting with the left.

6  
7 Participants were instructed to indicate when they heard a noise by raising their finger. If an  
8  
9 irregular pattern was found (a combination of responses indicating that quieter sounds were  
10  
11 heard but louder ones were not), the test was repeated at least 60s later for that ear.

12  
13 Participants with an irregular pattern at the first test, but a regular pattern at the second test,  
14  
15 were included in the analyses. Further details of the testing procedures are available  
16  
17 elsewhere.<sup>17</sup>

## 20 **Outcomes**

### 21 *Hearing loss*

22  
23  
24  
25 Hearing loss was defined as >35dBHL at 3.0 kHz in the better-hearing ear, the level at which  
26  
27 intervention has been shown to be definitely beneficial.<sup>26</sup> More specifically, a comparison of  
28  
29 different screen programmes conducted as part of the NHS Health Technology Assessment  
30  
31 Programme showed that the combination of >35dBHL at 3.0 kHz was the best predictor (in  
32  
33 terms of the d-prime statistic: a combination of good sensitivity and low false alarm rate) for  
34  
35 the ability of persons to gain the greatest benefit from hearing aids.<sup>26</sup> Hearing loss of  
36  
37 >35dBHL at 3.0 kHz had 88% sensitivity and 10% false alarm rate.<sup>26</sup> Hearing loss was  
38  
39 subdivided into two mutually exclusive categories: (1) ‘moderate loss’ : >35dBHL to  
40  
41 54dBHL (tone not heard at 35dBHL, but heard at 55dBHL and at 75dBHL), and (2)  
42  
43 ‘moderately severe or severe loss’ : >55dBHL (tone not heard at 35dBHL and at 55dBHL,  
44  
45 but the tone may, or may not, have been heard at 75dBHL). Prevalence estimates were  
46  
47 multiplied by the 2014 household population to estimate the number of people with hearing  
48  
49 loss.<sup>27</sup>

### 50 *Current hearing aid use*

1  
2  
3 As part of the main interview, all participants were asked if they ever wore a hearing aid  
4 nowadays: those who answered negatively were asked whether they had ever tried one.

5  
6  
7 Current hearing aid use, for the purposes of the present study, consisted of those participants  
8 who answered positively to the question about use of a hearing aid nowadays. Participants  
9 who answered positively to the question about use of a hearing aid nowadays. Participants  
10 classed as not currently using a hearing aid consisted of those who had tried hearing aids in  
11 the past but did not use a hearing aid nowadays, and those who had never tried a hearing aid.  
12  
13  
14

### 15 16 **Markers of socioeconomic status**

17  
18 Tertiles of equivalised household income, quintiles of the area-based Index of Multiple  
19 Deprivation (IMD 2010: Q1 least deprived; Q5 most deprived)<sup>28</sup>, and the highest formal  
20 educational attainment (degree or higher, below degree, no qualifications) were chosen as  
21 related, but different, markers of SES. Broader categories of SES were used for the analysis  
22 of current hearing aid use among persons with hearing loss due to smaller sample sizes. The  
23 IMD 2010 quintiles were recoded into three categories: Q1 and Q2 (least deprived); Q3; and  
24 Q4 and Q5 (most deprived). Educational status was recoded into two categories: O level and  
25 above, and no qualifications.  
26  
27  
28  
29  
30  
31  
32  
33  
34  
35

### 36 37 **Covariates**

38  
39 Covariates were grouped into: (1) demographic characteristics (age, region), (2) exposure to  
40 work-related noise, and (3) risk factors for CVD (cigarette smoking, body mass index,  
41 diabetes, hypertension, dyslipidaemia, and physical inactivity). Modifiable risk factors for  
42 CVD are well-known to be independently associated with hearing impairment<sup>11;29</sup>, and  
43 potentially confound the associations between SES and hearing loss. Age-at-interview was  
44 categorized into four groups (45-54, 55-64, 65-74, and 75+ years). Government Office  
45 Region was grouped into North, Midlands, London, and South. Duration of exposure to  
46 work-related noise was established by asking participants whether they had ever worked in a  
47  
48  
49  
50  
51  
52  
53  
54  
55  
56  
57  
58  
59  
60

1  
2  
3 place that was so noisy that you had to shout to be heard (response categories: 'no', 'yes, for  
4 less than 1 year', 'yes, for at least 1 year but less than 5 years', and 'yes, for 5 years or  
5 longer'). Cigarette smoking status categories were current, ex-regular and never. Single  
6 measurements of height and weight were taken by trained interviewers using standard  
7 protocols. Body mass index (BMI) was computed as weight in kilogrammes (kg) divided by  
8 height in metres squared (m<sup>2</sup>): participants were classified as normal-weight (18.5-  
9 24.9kg/m<sup>2</sup>), overweight (25.0-29.9kg/m<sup>2</sup>), or obese ( $\geq 30.0$ kg/m<sup>2</sup>). We used two indicators of  
10 hyperglycaemia: self-reported physician diagnosis of diabetes, and raised glycated  
11 haemoglobin (HbA1c  $\geq 48$ mmol/mol) irrespective of diagnosis. Hypertension was defined as  
12 systolic blood pressure  $\geq 140$  mmHg and/or diastolic blood pressure  $\geq 90$  mmHg and/or  
13 current use of medication taken for the purposes of lowering blood pressure. Total cholesterol  
14 was measured in non-fasting blood samples. Dyslipidaemia was defined as total cholesterol  
15  $\geq 5.0$ mmol/L and/or current use of lipid-lowering medication. Based on the Short-Form  
16 International Physical Activity Questionnaire (IPAQ), participants spending  $< 30$  minutes per  
17 week in moderate-to-vigorous physical activity were classed as physically inactive.<sup>30</sup> Broader  
18 categories of these covariates were used in some cases for the analysis of current hearing aid  
19 use due to smaller sample sizes. Age-at-interview was recoded into three categories: 45-64;  
20 65-74; and 75+ years. Duration of exposure to work-related noise was dichotomised into  
21 none and at least some exposure to loud noise.  
22  
23  
24  
25  
26  
27  
28  
29  
30  
31  
32  
33  
34  
35  
36  
37  
38  
39  
40  
41  
42  
43

#### 44 **Statistical analysis**

45  
46  
47 All analyses were sex-specific. Hearing loss prevalence (overall and by severity) was  
48 estimated among the overall population and as stratified by demographic characteristics,  
49 exposure to work-related noise, CVD risk factors, and SES. Prevalence estimates were  
50 directly age-standardised within sex to the English household population using the four age-  
51 groups described above. Differences in the prevalence of hearing loss across groups were  
52  
53  
54  
55  
56  
57

1  
2  
3 evaluated using the chi-square  $\chi^2$  test. This analysis was repeated to estimate the prevalence  
4  
5 of current hearing aid use among those participants with hearing loss.  
6

7  
8 Logistic regression modelling was used to evaluate the association between SES and hearing  
9  
10 loss after adjustment for demographics, exposure to work-related noise, and CVD risk  
11  
12 factors. Associations were summarised using Odds Ratios (OR) with 95% Confidence  
13  
14 Intervals (CI). We decided a priori to run separate models for the three indicators of SES  
15  
16 rather than estimate a single model to avoid multicollinearity. Two sequential models were  
17  
18 fitted. SES and hearing loss associations were age-adjusted (Model A), and then further  
19  
20 adjusted for region, exposure to work-related noise, and CVD risk factors (Model B). To  
21  
22 maximise power age was entered in the models as a continuous variable. SES was entered in  
23  
24 the models as a categorical variable, with the highest status group as the reference category.  
25  
26 We repeated the analyses to evaluate the association between SES and current hearing aid  
27  
28 use, with an additional adjustment for the severity of hearing loss. All analyses accounted for  
29  
30 the complex survey design, incorporating the nurse-visit weight which accounted for  
31  
32 individual non-participation and preserved the national representativeness of the sample. Data  
33  
34 set preparation was performed in SPSS V.20.0 (SPSS IBM Inc., Chicago, Illinois, USA).  
35  
36 Statistical analysis was conducted using Stata V13.1 (College Station, Texas, USA). The  
37  
38 HSE 2014 dataset is available via the UK Data Service (<http://www.ukdataservice.ac.uk>).  
39  
40  
41

## 42 **RESULTS**

43  
44  
45 Compared to participants with data collected from the nurse-visit stage, participants  
46  
47 interviewed in the survey but without data from the nurse-visit were more likely to be in the  
48  
49 lowest income tertile ( $P=0.002$ ), to have no formal educational qualifications ( $P<0.001$ ), to  
50  
51 reside in the most deprived IMD quintile ( $P<0.001$ ), and to be current cigarette smokers  
52  
53 ( $P=0.011$ ) (Supplementary Table 1).  
54  
55  
56  
57

## Hearing loss

Table 1 shows the age-standardised estimates of the prevalence of hearing loss. For simplicity, we present only estimates by age, duration of exposure to work-related noise, and each indicator of SES in the main text, with the estimates for region and for each CVD risk factor available as Supplementary data. Overall, 26% of men and 20% of women aged 45+ years had hearing loss defined as  $>35\text{dBHL}$  at 3.0 kHz in the better-hearing ear ( $n=769/3292$ ), equivalent to 5.2 million persons. The prevalence of ‘moderate’ loss (15% men, 12% women) exceeded that of ‘moderately severe or severe’ loss (11% men, 7% women). Hearing loss increased monotonically with age, reaching 67% of men and 58% of women aged 75+ years. Only among men in the oldest age-group did the prevalence of ‘moderately severe or severe’ loss (39%) exceed that of ‘moderate’ loss (29%). Among men, hearing loss was higher among those exposed to work-related noise for  $\geq 5$  years ( $P<0.001$ ), in the lowest income tertile ( $P=0.005$ ), residing in areas of higher deprivation ( $P=0.011$ ), and with no formal educational qualifications ( $P<0.001$ ). Patterns among women were similar but the differences in the prevalence of hearing loss across the SES groups only reached marginal statistical significance ( $P=0.077$  and  $P=0.070$  for IMD and for educational status, respectively). Of the risk factors for CVD, hearing loss was higher among men and women with doctor-diagnosed diabetes ( $P<0.001$  men;  $P=0.005$  women), with elevated Hb1Ac irrespective of diagnosis ( $P<0.001$  men;  $P=0.025$  women), and among women classed as physically inactive ( $P=0.028$ ) (Supplementary Table 2).

*(Table 1 here)*

Figure 2 shows the associations between SES and hearing loss (expressed as odds ratios) after age (Model A) and additional adjustment for region, duration of exposure to work-related noise, and CVD risk factors (Model B). Among men, the multivariable-adjusted associations were partly attenuated: nevertheless, the multivariable-adjusted odds of hearing loss showed a

1  
2  
3 strong socioeconomic gradient. The odds of hearing loss were almost twice as high for men  
4 in the lowest versus the highest income tertile (OR: 1.77; 95% CI: 1.15, 2.74) and were over  
5 twice as high for men with no formal educational qualifications versus those with at least a  
6 degree (OR: 2.35; 95% CI: 1.54, 3.59). For women, SES was marginally significantly  
7 associated with hearing loss. For example, the odds of hearing loss were 1.4 times higher for  
8 women with no formal educational qualifications versus those with at least a degree (OR:  
9 1.43, 95% CI: 0.83, 2.48).  
10  
11  
12  
13  
14  
15  
16  
17  
18  
19  
20

21 *(Figure 2 here)*  
22

### 23 **Current hearing aid use**

24  
25  
26 Among participants with hearing loss, 30% of men and 27% of women wore hearing aids  
27 nowadays ( $n=264/769$ ; Table 2). Lower proportions had tried hearing aids in the past but did  
28 not use a hearing aid nowadays (7% men, 10% women): higher proportions had never tried a  
29 hearing aid (63% men, 64% women) (data not shown). Current use of a hearing aid for  
30 persons with 'moderately severe or severe' loss (53% men, 47% women) exceeded that for  
31 persons with 'moderate' loss (18% men, 19% women) ( $p<0.001$  men;  $p=0.004$  women).  
32  
33  
34  
35  
36  
37  
38  
39 Current hearing aid use increased monotonically with age but was confined to the minority,  
40 reaching close to 40% for participants aged 75+ years.  
41  
42  
43

44 *(Table 2 here)*  
45

46  
47 Differences in current hearing aid use by population subgroups were typically minor  
48 ( $p>0.05$ ), with the exception of lower use of a hearing aid nowadays among women classed  
49 as physically inactive ( $p=0.003$ ) (Supplementary Table 3). Lower use among participants  
50 reporting doctor-diagnosed diabetes ( $n=143/768$ ) was marginally statistically significant  
51 ( $p=0.101$  men;  $p=0.077$  women). Figure 3 shows the associations between SES and current  
52  
53  
54  
55  
56  
57

1  
2  
3 hearing aid use after age- (Model A) and full-adjustment (Model B). Compared with men in  
4 the highest income tertile, the multivariable-adjusted odds of using a hearing aid nowadays  
5 were lower for men in the middle (OR: 0.50; 95% CI: 0.25, 0.99) and the lowest (OR: 0.47;  
6 95% CI: 0.23, 0.97) income tertiles. Among men, area deprivation (as measured by IMD) and  
7 highest educational attainment were associated with current hearing aid use in the same  
8 direction (i.e. lower levels of use in the lower SES groups) but the odds ratios did not reach  
9 statistical significance. For women, SES was not associated with current hearing aid use.  
10  
11  
12  
13  
14  
15  
16  
17

18 *(Figure 3 here)*  
19

## 20 21 **DISCUSSION**

22  
23 In this nationally-representative sample of community-dwelling persons aged 45 years and  
24 over, more than one in four persons had a level of hearing loss that would benefit from  
25 hearing aid use. However, less than one in three persons with hearing loss reported using a  
26 hearing aid nowadays, suggesting a significant level of unmet need. The burden of hearing  
27 loss fell highest among persons in the lowest SES groups, especially among men, suggesting  
28 hearing loss as a source of socioeconomic inequalities in health. Even after adjustment for the  
29 severity of hearing loss, hearing aid use was evidently lower for men in the middle- and low-  
30 income groups compared with their high-income counterparts.  
31  
32  
33  
34  
35  
36  
37  
38  
39  
40

41 Comparisons with previous studies are difficult due to differences in the age-range of  
42 participants.<sup>6</sup> Considerable heterogeneity also exists in the definition and the measurement of  
43 hearing loss.<sup>31</sup> The WHO defines adult disabling hearing impairment as a permanent unaided  
44 hearing threshold for the better-hearing ear of  $\geq 41$  dBHL (averaged over 0.5, 1.0, 2.0 and 4.0  
45 kHz).<sup>32</sup> Using this definition, disabling hearing loss was estimated to affect 360 million  
46 people worldwide in 2012 (more than 5% of the global population).<sup>33</sup> The Global Burden of  
47 Disease Hearing Loss Expert Group uses a threshold of  $>35$  dBHL for all age-groups, and  
48  
49  
50  
51  
52  
53  
54  
55  
56  
57



1  
2  
3 equates “unilateral hearing impairment” with “bilateral mild hearing impairment”.<sup>7</sup> The  
4  
5 estimated global prevalence of hearing loss using this alternative definition was 12% for  
6  
7 males and 10% for females aged  $\geq 15$  in 2008.<sup>7</sup> Analysis of HSE 2014 data by the same  
8  
9 authors of the present study found that 13% of adults (14% men, 12% women) had loss of  
10  
11  $>35$ dBHL at 3.0 kHz in the better-hearing ear.<sup>17</sup> Our findings of differences in the burden of  
12  
13 hearing loss agree with other population-based studies in which the prevalence of hearing  
14  
15 loss was higher for men than women<sup>6-8;34-37</sup>, increased monotonically with age<sup>6-9;21;34-36;38</sup>,  
16  
17 increased with longer exposure to occupational noise<sup>8</sup>, co-existed with CVD risk factors such  
18  
19 as diabetes<sup>6;8-11</sup>, and was higher in the lowest SES groups<sup>6;9;35;36;38;39</sup>, especially for men.<sup>12</sup> In  
20  
21 contrast to other studies<sup>6;8-10</sup>, hearing loss did not vary in the present study by current  
22  
23 smoking status.  
24  
25

26  
27 Other studies have shown similar or lower levels of hearing aid use among persons with  
28  
29 hearing loss. Using the Digit Triplet Test, 21.5% of UK Biobank participants aged 40-69  
30  
31 years with ‘poor’ speech recognition in noise testing reported using a hearing aid.<sup>38</sup> Based on  
32  
33 the 1999-2006 US National Health and Nutrition Examination Survey, hearing aid use among  
34  
35 participants aged 50+ years with hearing loss was 14.2%.<sup>15</sup> Our findings of subgroup  
36  
37 differences in levels of hearing aid use are consistent with other studies which showed that  
38  
39 use increases with age<sup>15;40</sup> and with the severity of hearing loss.<sup>15;19</sup> Our finding of lower  
40  
41 utilisation among men in the lowest SES groups, independent of the severity of hearing loss,  
42  
43 is also consistent with other studies.<sup>18;19;38;40;41</sup>  
44  
45

46  
47 Associations between SES and hearing loss likely involve multiple simultaneous pathways<sup>35</sup>  
48  
49 including other concomitant factors of lower SES such as educational and employment  
50  
51 factors (including exposure to work-related noise), and modifiable lifestyle factors.<sup>8</sup> While  
52  
53 occupational noise is now limited and generally well-controlled in the UK<sup>42</sup>, past exposure  
54  
55 may have had serious long-term consequences for hearing in middle- and older-age.  
56  
57

1  
2  
3 It remains unclear the extent to which hearing loss is a driver of low SES or whether low SES  
4 is a driver of hearing loss.<sup>35</sup> First, analysis in Finland showed that hearing loss early in life –  
5 with its detrimental impact on educational attainment in adolescence – can be a driver of low  
6 SES in young adulthood through fewer opportunities for entering into higher education and  
7 through more frequent spells of unemployment.<sup>43</sup> Secondly, longitudinal studies have  
8 suggested low SES to be a key driver of hearing loss in middle-to-older age through factors  
9 such as working in jobs with a greater potential for exposure to damaging levels of noise. For  
10 example, analysis of the Beaver Dam Eye Study showed that the development of incident  
11 hearing loss was more likely among participants with lower levels of educational attainment  
12 and among those participants who worked in industrial occupations versus management and  
13 professional positions.<sup>37;44</sup>

14  
15  
16  
17  
18  
19  
20  
21  
22  
23  
24  
25  
26  
27 The diabetes-hearing loss associations found in our study are in agreement with a recent  
28 meta-analysis.<sup>45</sup> Explanations for the association between diabetes and hearing loss include  
29 the microvascular and neuropathic complications that affect diabetics in multiple organ  
30 systems which may also affect the inner ear.<sup>46;47</sup> This study confirms the low level of current  
31 hearing aid use, especially among men in the lowest SES groups. Previous studies have  
32 demonstrated non-financial barriers to uptake and use, with self-recognition of hearing  
33 problems being the strongest factor.<sup>48</sup> Low take-up and use are typically attributed to a  
34 perception of hearing loss being an expected consequence of ageing. Non-audiological  
35 drivers for older adults with hearing impairment consulting a health professional and/or to  
36 use hearing aids included a positive attitude to hearing aids (their own and from significant  
37 others) and self-efficacy about hearing aids (e.g. placement and battery removal).<sup>49</sup> Although  
38 treatment and hearing aid provision is financially supported in the UK through the National  
39 Health Service, persons in the lower SES groups use specialist health services less frequently  
40 than those in higher SES groups.<sup>50</sup>

1  
2  
3 The main strength of this study was the use of valid screening audiometry data within a  
4 nationally-representative health examination survey. Data from a hearing test overcomes the  
5 under-estimation of socioeconomic inequalities in health that are typically associated with  
6 self-reports.<sup>51</sup> Other analyses of HSE 2014 showed that socioeconomic inequalities in hearing  
7 were most apparent using the data from the audiometric screening device but not from the  
8 self-report data<sup>17</sup>, partly reflecting differences in levels of expectations, and differences in  
9 levels of awareness of adverse health conditions.<sup>52</sup> This study also has a number of  
10 limitations. Differences in the propensity to respond at the nurse-visit may have weakened the  
11 sample's representativeness and reduced the generalizability of our findings, but the use of  
12 statistical weights to account for the biases in individual participation would have mitigated  
13 this to a considerable extent. The estimates of hearing loss prevalence are conservative due to  
14 the exclusion of: (1) the institutionalised population, (2) individuals with a cochlear implant  
15 or with a current ear infection, and (3) the exclusion of an unknown number of individuals  
16 with conditions such as deafness that were judged to impede interviewer-participant  
17 communication. The relatively small number of participants with hearing loss may have  
18 resulted in our analyses of current hearing aid use to be underpowered to detect differences  
19 among subgroups. For the same reason, we were unable to examine differences in utilisation  
20 among subgroups stratified by the severity of hearing loss. Insufficient numbers meant that  
21 we were unable to provide separate reliable estimates for minority ethnic groups. Our  
22 findings could have been influenced by unmeasured confounders such as the duration of  
23 exposure to non-occupational noise. Lastly, since we utilised cross-sectional data, we were  
24 unable to assess the temporal relationship between SES and hearing, and so could not  
25 establish causality.

26  
27  
28  
29  
30  
31  
32  
33  
34  
35  
36  
37  
38  
39  
40  
41  
42  
43  
44  
45  
46  
47  
48  
49  
50  
51  
52  
53 In conclusion, hearing loss is highly prevalent, affecting more than one in four men and  
54 affecting one in five women. However, less than one in three persons with hearing loss

1  
2  
3 reported using a hearing aid nowadays, suggesting a significant level of unmet need. Whilst  
4 the burden of hearing loss falls highest among persons, but especially men, in the lowest SES  
5 groups, use of hearing aids is demonstrably lower. Initiatives to detect hearing loss early, and  
6 the increased uptake of hearing aids, may provide substantial public health benefits and  
7 reduce socioeconomic inequalities in health.  
8  
9  
10  
11  
12

### 13 14 **Contributors** 15

16 SS, JB, AD and JM were responsible for developing the design of the study.  
17 SS was responsible for conducting the analyses, interpreting the results, and drafting the  
18 manuscript. SS, JB, AD and JM critically revised the manuscript. All authors have read and  
19 approved the final manuscript.  
20  
21

### 22 23 **Funding** 24

25 This research received no specific grant from any funding agency in the public, commercial  
26 or not-for-profit sectors.  
27  
28

### 29 30 **Competing Interests** 31

32 None.  
33  
34

### 35 36 **Data sharing** 37

38 The Health Survey for England 2014 dataset is available via the UK Data Service  
39 (<http://www.ukdataservice.ac.uk>). Statistical code is available from the corresponding author  
40 at [s.scholes@ucl.ac.uk](mailto:s.scholes@ucl.ac.uk)  
41  
42  
43  
44  
45  
46  
47  
48  
49  
50  
51  
52  
53  
54  
55  
56  
57

**Table 1** Age-standardised prevalence (%) and standard error (SE) of hearing loss, persons aged 45 years and over, HSE 2014

| Characteristics                                 | Males |                      |                  |                            |          | Females |                      |                  |                            |          |
|-------------------------------------------------|-------|----------------------|------------------|----------------------------|----------|---------|----------------------|------------------|----------------------------|----------|
|                                                 | n     | Hearing loss % (SE)* | Moderate % (SE)† | Moderate to severe % (SE)‡ | P-value§ | n       | Hearing loss % (SE)* | Moderate % (SE)† | Moderate to severe % (SE)‡ | P-value§ |
| N                                               | 1485  | 425                  | 244              | 181                        |          | 1807    | 344                  | 217              | 127                        |          |
| All                                             | 1485  | 26.2 (1.2)           | 15.2 (1.0)       | 11.0 (0.9)                 | -        | 1807    | 19.6 (1.0)           | 12.2 (0.8)       | 7.4 (0.7)                  |          |
| <b>Age-group:</b>                               |       |                      |                  |                            |          |         |                      |                  |                            |          |
| 45-54                                           | 420   | 8.0 (1.5)            | 7.0 (1.4)        | 1.0 (0.5)                  | <0.001   | 560     | 3.1 (0.9)            | 2.3 (0.7)        | 0.7 (0.4)                  | <0.001   |
| 55-64                                           | 401   | 17.0 (2.0)           | 10.9 (1.7)       | 6.1 (1.2)                  |          | 446     | 10.6 (1.6)           | 8.6 (1.4)        | 2.0 (0.7)                  |          |
| 65-74                                           | 402   | 37.0 (2.5)           | 23.8 (2.2)       | 13.3 (2.0)                 |          | 476     | 20.4 (1.8)           | 14.5 (1.6)       | 5.9 (1.1)                  |          |
| 75+                                             | 262   | 67.3 (3.2)           | 28.6 (2.8)       | 38.7 (3.1)                 |          | 325     | 57.9 (2.9)           | 30.6 (2.5)       | 27.3 (2.6)                 |          |
| <b>Duration of work-related noise exposure:</b> |       |                      |                  |                            |          |         |                      |                  |                            |          |
| None                                            | 819   | 22.2 (1.6)           | 13.4 (1.3)       | 8.9 (1.2)                  | <0.001   | 1468    | 18.6 (1.1)           | 12.1 (0.9)       | 6.5 (0.7)                  | 0.091    |
| Less than 5 years                               | 226   | 24.6 (2.9)           | 11.1 (2.3)       | 13.5 (2.4)                 |          | 128     | 18.8 (3.8)           | 10.8 (3.0)       | 7.9 (2.7)                  |          |
| 5+ years                                        | 434   | 35.1 (2.5)           | 21.5 (2.1)       | 13.6 (1.7)                 |          | 210     | 25.4 (3.0)           | 13.6 (2.4)       | 11.8 (2.2)                 |          |
| <b>Income tertiles:</b>                         |       |                      |                  |                            |          |         |                      |                  |                            |          |
| Highest                                         | 491   | 21.3 (2.5)           | 13.1 (2.0)       | 8.2 (1.7)                  | 0.005    | 484     | 16.5 (2.3)           | 11.0 (1.9)       | 5.5 (1.4)                  | 0.413    |
| Middle                                          | 458   | 28.6 (2.2)           | 16.7 (1.9)       | 12.0 (1.5)                 |          | 562     | 19.3 (1.8)           | 11.9 (1.4)       | 7.4 (1.2)                  |          |
| Lowest                                          | 305   | 32.9 (2.8)           | 19.8 (2.2)       | 13.1 (2.0)                 |          | 417     | 20.1 (1.9)           | 13.1 (1.6)       | 7.0 (1.2)                  |          |
| <b>Index of Multiple Deprivation quintiles:</b> |       |                      |                  |                            |          |         |                      |                  |                            |          |
| Least deprived                                  | 369   | 21.4 (2.2)           | 11.0 (1.8)       | 10.3 (1.7)                 | 0.011    | 448     | 18.6 (2.1)           | 11.4 (1.5)       | 7.2 (1.4)                  | 0.077    |
| 2                                               | 340   | 23.0 (2.4)           | 13.2 (1.8)       | 9.8 (1.7)                  |          | 407     | 17.6 (1.7)           | 11.5 (1.5)       | 6.1 (1.2)                  |          |
| 3                                               | 311   | 27.2 (2.7)           | 17.1 (2.3)       | 10.1 (1.8)                 |          | 392     | 17.5 (2.1)           | 10.9 (1.7)       | 6.6 (1.5)                  |          |
| 4                                               | 255   | 32.6 (2.9)           | 18.2 (2.5)       | 14.4 (2.2)                 |          | 312     | 19.8 (2.6)           | 10.6 (2.1)       | 9.2 (1.7)                  |          |
| Most deprived                                   | 210   | 30.2 (3.3)           | 18.0 (2.6)       | 12.2 (2.6)                 |          | 248     | 26.3 (2.7)           | 18.4 (2.4)       | 7.9 (1.7)                  |          |
| <b>Education status:</b>                        |       |                      |                  |                            |          |         |                      |                  |                            |          |
| Degree or higher                                | 344   | 20.1 (2.6)           | 12.3 (2.1)       | 7.8 (1.7)                  | <0.001   | 309     | 14.5 (3.5)           | 7.8 (2.2)        | 6.7 (2.5)                  | 0.070    |
| Below degree                                    | 733   | 23.2 (1.8)           | 12.8 (1.3)       | 10.4 (1.4)                 |          | 941     | 18.4 (1.6)           | 12.1 (1.2)       | 6.4 (1.1)                  |          |
| No qualifications                               | 407   | 40.1 (3.0)           | 26.5 (2.9)       | 13.7 (1.7)                 |          | 555     | 23.6 (2.1)           | 14.7 (1.8)       | 8.9 (1.1)                  |          |

\* Hearing loss: >35dBHL at 3.0 kHz (tone not heard at 35dBHL).

† Moderate loss: >35 to 54dBHL (tone not heard at 35dBHL, but heard at 55 and at 75dBHL).

1  
2 ‡ Moderately severe or severe loss: >55 dBHL (tone not heard at 35 and at 55dBHL, but may or may not have heard the tone at 75dBHL).  
3 § Prevalence of hearing loss (>35dBHL at 3.0 kHz in the better hearing ear) across the categories of each variable (age-group; duration of work-  
4 related noise exposure; income tertiles; Index of Multiple Deprivation quintiles; and highest educational attainment) were compared using the  
5 Chi-square ( $\chi^2$ ) tests. No adjustment to the p-values for multiple comparisons was made.  
6  
7  
8  
9  
10  
11  
12  
13  
14  
15  
16  
17  
18  
19  
20  
21  
22  
23  
24  
25  
26  
27  
28  
29  
30  
31  
32  
33  
34  
35  
36  
37  
38  
39  
40  
41  
42  
43  
44  
45  
46  
47

For peer review only

**Table 2** Age-standardized prevalence (%) and standard error (SE) of hearing aid use among persons with hearing loss, persons aged 45 years and over, HSE 2014

| Characteristics                                 | Men |                        |                  | Women |                        |                  |
|-------------------------------------------------|-----|------------------------|------------------|-------|------------------------|------------------|
|                                                 | N   | Hearing aid use % (SE) | <i>P</i> -value* | N     | Hearing aid use % (SE) | <i>P</i> -value* |
| N                                               | 425 | 29.7 (3.1)             |                  | 344   | 26.9 (3.3)             |                  |
| <b>Severity of loss:</b>                        |     |                        |                  |       |                        |                  |
| Moderate <sup>†</sup>                           | 244 | 17.8 (3.2)             | <0.001           | 217   | 19.1 (3.5)             | 0.002            |
| Moderate to severe <sup>‡</sup>                 | 181 | 52.9 (6.3)             |                  | 127   | 47.1 (8.7)             |                  |
| <b>Age-group:</b>                               |     |                        |                  |       |                        |                  |
| 45-64                                           | 101 | 25.4 (4.6)             | 0.056            | 63    | 21.2 (5.1)             | 0.035            |
| 65-74                                           | 147 | 34.3 (4.3)             |                  | 94    | 31.4 (4.9)             |                  |
| 75+                                             | 177 | 40.2 (3.7)             |                  | 187   | 39.1 (3.7)             |                  |
| <b>Duration of work-related noise exposure:</b> |     |                        |                  |       |                        |                  |
| None                                            | 250 | 26.1 (3.9)             | 0.234            | 287   | 25.3 (3.6)             | 0.296            |
| Some                                            | 173 | 33.5 (4.9)             |                  | 56    | 35.5 (9.4)             |                  |
| <b>Income tertiles:</b>                         |     |                        |                  |       |                        |                  |
| Highest                                         | 84  | 36.0 (6.5)             | 0.548            | 54    | 24.7 (6.5)             | 0.900            |
| Middle                                          | 149 | 31.2 (5.5)             |                  | 105   | 28.6 (5.8)             |                  |
| Lowest                                          | 118 | 26.0 (6.1)             |                  | 90    | 26.0 (7.0)             |                  |
| <b>Index of Multiple Deprivation quintiles:</b> |     |                        |                  |       |                        |                  |
| Least deprived 1 & 2                            | 179 | 29.8 (5.3)             | 0.812            | 158   | 29.1 (5.2)             | 0.615            |
| Quintile 3                                      | 101 | 33.5 (8.0)             |                  | 66    | 29.3 (6.6)             |                  |
| Most deprived 4 & 5                             | 145 | 27.9 (4.6)             |                  | 120   | 22.6 (5.6)             |                  |
| <b>Education status:</b>                        |     |                        |                  |       |                        |                  |
| O level or above                                | 227 | 32.3 (4.2)             | 0.354            | 151   | 28.0 (4.3)             | 0.654            |
| No qualifications                               | 198 | 26.3 (4.6)             |                  | 192   | 24.7 (5.6)             |                  |

\* Prevalence of current hearing aid use across the categories of each variable (age-group; duration of work-related noise exposure; income tertiles; Index of Multiple Deprivation

quintiles; and highest educational attainment) were compared using the Chi-square ( $\chi^2$ ) test. No adjustment to the p-values for multiple comparisons was made.

† Moderate loss: >35 to 54dBHL (tone not heard at 35dBHL, but tone heard at 55 and 75dBHL).

‡ Moderately severe or severe loss: >55dBHL (tone not heard at 35 and 55dBHL, but may or may not have heard the tone at 75dBHL).

For peer review only



## Reference List

- (1) Lin FR, Yaffe K, Xia J, Xue QL, Harris TB, Purchase-Helzner E et al. Hearing loss and cognitive decline in older adults. *JAMA Intern Med* 2013; 173(4):293-299.
- (2) Lin FR, Metter EJ, O'Brien RJ, Resnick SM, Zonderman AB, Ferrucci L. Hearing loss and incident dementia. *Arch Neurol* 2011; 68(2):214-220.
- (3) Surprenant AM, DiDonato R. Community-dwelling older adults with hearing loss experience greater decline in cognitive function over time than those with normal hearing. *Evid Based Nurs* 2014;17:60-61.
- (4) World Health Organization. Prevention of noise-induced hearing loss. 1997.
- (5) Olusanya BO, Neumann KJ, Saunders JE. The global burden of disabling hearing impairment: a call to action. *Bull World Health Organ* 2014; 92(5):367-373.
- (6) Agrawal Y, Platz EA, Niparko JK. Prevalence of hearing loss and differences by demographic characteristics among US adults: data from the National Health and Nutrition Examination Survey, 1999-2004. *Arch Intern Med* 2008; 168(14):1522-1530.
- (7) Stevens G, Flaxman S, Brunskill E, Mascarenhas M, Mathers CD, Finucane M. Global and regional hearing impairment prevalence: an analysis of 42 studies in 29 countries. *Eur J Public Health* 2013; 23(1):146-152.
- (8) Hoffman HJ, Dobie RA, Losonczy KG, Themann CL, Flamme GA. Declining Prevalence of Hearing Loss in US Adults Aged 20 to 69 Years. *JAMA Otolaryngol Head Neck Surg* 2017;143(3):274-285.
- (9) Rigtters SC, Metselaar M, Wieringa MH, Baatenburg de Jong RJ, Hofman A, Goedegebure A. Contributing Determinants to Hearing Loss in Elderly Men and Women: Results from the Population-Based Rotterdam Study. *Audiol Neurootol* 2016; 21 Suppl 1:10-15.
- (10) Agrawal Y, Platz EA, Niparko JK. Risk factors for hearing loss in US adults: data from the National Health and Nutrition Examination Survey, 1999 to 2002. *Otol Neurotol* 2009; 30(2):139-145.
- (11) Kim MB, Zhang Y, Chang Y, Ryu S, Choi Y, Kwon MJ et al. Diabetes mellitus and the incidence of hearing loss: a cohort study. *Int J Epidemiol* 2017;46(2):717-726.
- (12) Helvik AS, Krokstad S, Tambs K. Socioeconomic inequalities in hearing loss in a healthy population sample: The HUNT Study. *Am J Public Health* 2009; 99(8):1376-1378.
- (13) Peracino A, Pecorelli S. The Epidemiology of Cognitive Impairment in the Aging Population: Implications for Hearing Loss. *Audiol Neurootol* 2016; 21 Suppl 1:3-9.

- 1  
2  
3  
4  
5  
6  
7  
8  
9  
10  
11  
12  
13  
14  
15  
16  
17  
18  
19  
20  
21  
22  
23  
24  
25  
26  
27  
28  
29  
30  
31  
32  
33  
34  
35  
36  
37  
38  
39  
40  
41  
42  
43  
44  
45  
46  
47  
48  
49  
50  
51  
52  
53  
54  
55  
56  
57  
58  
59  
60
- (14) Popelka MM, Cruickshanks KJ, Wiley TL, Tweed TS, Klein BE, Klein R. Low prevalence of hearing aid use among older adults with hearing loss: the Epidemiology of Hearing Loss Study. *J Am Geriatr Soc* 1998; 46(9):1075-1078.
  - (15) Chien W, Lin FR. Prevalence of hearing aid use among older adults in the United States. *Arch Intern Med* 2012; 172(3):292-293.
  - (16) Hartley D, Rochtchina E, Newall P, Golding M, Mitchell P. Use of hearing AIDS and assistive listening devices in an older Australian population. *J Am Acad Audiol* 2010; 21(10):642-653.
  - (17) Scholes S, Mindell J. Hearing. In: Craig R, Mindell J, editors. Health Survey for England 2014 Volume 1 Health, social care and lifestyles. Leeds: Health and Social Care Information Centre; 2015.
  - (18) Nieman CL, Marrone N, Szanton SL, Thorpe RJ, Jr., Lin FR. Racial/Ethnic and Socioeconomic Disparities in Hearing Health Care Among Older Americans. *J Aging Health* 2016; 28(1):68-94.
  - (19) Helvik AS, Krokstad S, Tambs K. How sociodemographic and hearing related factors were associated with use of hearing aid in a population-based study: The HUNT Study. *BMC Ear Nose Throat Disord* 2016; 16:8.
  - (20) Mamo SK, Nieman CL, Lin FR. Prevalence of Untreated Hearing Loss by Income among Older Adults in the United States. *J Health Care Poor Underserved* 2016; 27(4):1812-1818.
  - (21) Davis AC. The prevalence of hearing impairment and reported hearing disability among adults in Great Britain. *Int J Epidemiol* 1989; 18(4):911-917.
  - (22) Davis A. Hearing in adults. London: Whurr; 1995.
  - (23) Mindell J, Biddulph JP, Hirani V, Stamatakis E, Craig R, Nunn S et al. Cohort profile: the health survey for England. *Int J Epidemiol* 2012; 41(6):1585-1593.
  - (24) Parving A, Sørup Sørensen M, Christensen B, Davis A. Evaluation of a hearing screener. *Audiological Medicine* 2008; 6(2):115-119.
  - (25) Fellizar-Lopez KR, Abes GT, Reyes-Quintos M, Rina T, Tantoco M, Leah S. Accuracy of Siemens HearCheck™ Navigator as a Screening Tool for Hearing Loss. *Philippine Journal of Otolaryngology Head and Neck Surgery* 2011; 26(1):10-15.
  - (26) Davis A, Smith P, Ferguson M, Stephens D, Gianopoulos I. Acceptability, benefit and costs of early screening for hearing disability: a study of potential screening tests and models. *Health Technol Assess* 2007; 11(42):1-294.
  - (27) Office for National Statistics. Population estimates for UK, England and Wales, Scotland and Northern Ireland: mid-2014 and mid-2013. 2015. ([www.ons.gov.uk/peoplepopulationandcommunity/populationandmigration/populationestimates/bulletins/annualmidyearpopulationestimates/2015-06-25](http://www.ons.gov.uk/peoplepopulationandcommunity/populationandmigration/populationestimates/bulletins/annualmidyearpopulationestimates/2015-06-25))
  - (28) Department for Communities and Local Government. The English Indices of deprivation 2010. 2011. London, Department for Communities and Local Government. ([www.gov.uk/government/uploads/system/uploads/attachment\\_data/file/6871/1871208.pdf](http://www.gov.uk/government/uploads/system/uploads/attachment_data/file/6871/1871208.pdf))

- 1  
2  
3  
4  
5  
6  
7  
8  
9  
10  
11  
12  
13  
14  
15  
16  
17  
18  
19  
20  
21  
22  
23  
24  
25  
26  
27  
28  
29  
30  
31  
32  
33  
34  
35  
36  
37  
38  
39  
40  
41  
42  
43  
44  
45  
46  
47  
48  
49  
50  
51  
52  
53  
54  
55  
56  
57  
58  
59  
60
- (29) Fischer ME, Schubert CR, Nondahl DM, Dalton DS, Huang GH, Keating BJ et al. Subclinical atherosclerosis and increased risk of hearing impairment. *Atherosclerosis* 2015; 238(2):344-349.
- (30) Scholes S, Bridges S, Ng FL, Mindell JS. Comparison of the Physical Activity and Sedentary Behaviour Assessment Questionnaire and the Short-Form International Physical Activity Questionnaire: An Analysis of Health Survey for England Data. *PLoS One* 2016; 11(3):e0151647.
- (31) Roth TN, Hanebuth D, Probst R. Prevalence of age-related hearing loss in Europe: a review. *Eur Arch Otorhinolaryngol* 2011; 268(8):1101-1107.
- (32) World Health Organization. Prevention of blindness and deafness. Grades of hearing impairment. 2013.
- (33) World Health Organization. Global estimates on prevalence of hearing loss. 2012.
- (34) Goman AM, Lin FR. Prevalence of Hearing Loss by Severity in the United States. *Am J Public Health* 2016; 106(10):1820-1822.
- (35) Emmett SD, Francis HW. The socioeconomic impact of hearing loss in U.S. adults. *Otol Neurotol* 2015; 36(3):545-550.
- (36) Cruickshanks KJ, Wiley TL, Tweed TS, Klein BE, Klein R, Mares-Perlman JA et al. Prevalence of hearing loss in older adults in Beaver Dam, Wisconsin. The Epidemiology of Hearing Loss Study. *Am J Epidemiol* 1998; 148(9):879-886.
- (37) Cruickshanks KJ, Nondahl DM, Tweed TS, Wiley TL, Klein BE, Klein R et al. Education, occupation, noise exposure history and the 10-yr cumulative incidence of hearing impairment in older adults. *Hear Res* 2010; 264(1-2):3-9.
- (38) Dawes P, Fortnum H, Moore DR, Emsley R, Norman P, Cruickshanks K et al. Hearing in middle age: a population snapshot of 40- to 69-year olds in the United Kingdom. *Ear Hear* 2014; 35(3):e44-e51.
- (39) Davis AC, Ecob R, Smith P. The relationship between work-based noise over the adult life course and hearing in middle age. *Int J Audiol* 2008; 47:100-108.
- (40) Bainbridge KE, Ramachandran V. Hearing aid use among older U.S. adults; the national health and nutrition examination survey, 2005-2006 and 2009-2010. *Ear Hear* 2014; 35(3):289-294.
- (41) Davis AC. Epidemiological profile of hearing impairments: the scale and nature of the problem with special reference to the elderly. *Acta Otolaryngol Suppl* 1990; 476:23-31.
- (42) Lutman M, Davis AC, Ferguson M. Epidemiological evidence for the effectiveness of the noise at work regulations. 2008. Health and Safety Executive.
- (43) Jarvelin MR, Maki-Torkko E, Sorri MJ, Rantakallio PT. Effect of hearing impairment on educational outcomes and employment up to the age of 25 years in northern Finland. *Br J Audiol* 1997; 31(3):165-175.
- (44) Cruickshanks KJ, Tweed TS, Wiley TL, Klein BE, Klein R, Chappell R et al. The 5-year incidence and progression of hearing loss: the epidemiology of hearing loss study. *Arch Otolaryngol Head Neck Surg* 2003; 129(10):1041-1046.

- 1  
2  
3  
4  
5  
6  
7  
8  
9  
10  
11  
12  
13  
14  
15  
16  
17  
18  
19  
20  
21  
22  
23  
24  
25  
26  
27  
28  
29  
30  
31  
32  
33  
34  
35  
36  
37  
38  
39  
40  
41  
42  
43  
44  
45  
46  
47  
48  
49  
50  
51  
52  
53  
54  
55  
56  
57  
58  
59  
60
- (45) Horikawa C, Kodama S, Tanaka S, Fujihara K, Hirasawa R, Yachi Y et al. Diabetes and risk of hearing impairment in adults: a meta-analysis. *J Clin Endocrinol Metab* 2013; 98(1):51-58.
- (46) Friedman SA, Schulman RH, Weiss S. Hearing and diabetic neuropathy. *Arch Intern Med* 1975; 135(4):573-576.
- (47) Fukushima H, Cureoglu S, Schachern PA, Paparella MM, Harada T, Oktay MF. Effects of type 2 diabetes mellitus on cochlear structure in humans. *Arch Otolaryngol Head Neck Surg* 2006; 132(9):934-938.
- (48) Knudsen LV, Oberg M, Nielsen C, Naylor G, Kramer SE. Factors influencing help seeking, hearing aid uptake, hearing aid use and satisfaction with hearing aids: a review of the literature. *Trends Amplif* 2010; 14(3):127-154.
- (49) Meyer C, Hickson L, Lovelock K, Lampert M, Khan A. An investigation of factors that influence help-seeking for hearing impairment in older adults. *Int J Audiol* 2014; 53 Suppl 1:S3-17.
- (50) Capewell S, Graham H. Will cardiovascular disease prevention widen health inequalities? *PLoS Med* 2010; 7(8):e1000320.
- (51) Chatterji P, Joo H, Lahiri K. EXAMINING THE EDUCATION GRADIENT IN CHRONIC ILLNESS. *Educ Econ* 2015; 23(6):735-750.
- (52) Johnston DW, Propper C, Shields MA. Comparing subjective and objective measures of health: Evidence from hypertension for the income/health gradient. *J Health Econ* 2009; 28(3):540-552.

**FIGURE 1 LEGEND**

Selection of Study Participants, Health Survey for England 2014

**FIGURE 2 LEGEND**

Association between socioeconomic status (SES) and hearing loss in middle-aged and older adults. Indicators of SES were: equivalised household income tertiles (highest tertile as reference), Index of Multiple Deprivation quintiles (most affluent), and highest educational attainment (degree or higher). Lines represent Odds Ratio (outcome = hearing loss) and its 95% confidence interval. Model A (triangles): adjusted for age. Model B (circles): adjusted for: age, exposure to work-related noise, region, and CVD risk factors (smoking, body mass index, diabetes, hypertension, dyslipidaemia, and physical inactivity).

**FIGURE 3 LEGEND**

Association between SES and current hearing aid use in middle-aged and older adults with hearing loss. Indicators of SES were: equivalised household income tertiles (highest tertile as reference), Index of Multiple Deprivation quintiles (least deprived Q1 and Q2), and highest educational attainment (O level and above). Lines represent Odds Ratio (outcome = hearing aid use) and its 95% confidence interval. Model A (triangles): adjusted for age. Model B (circles): adjusted for: age, severity of hearing loss, exposure to work-related noise, region, and CVD risk factors (smoking, body mass index, diabetes, hypertension, dyslipidaemia, and physical inactivity).

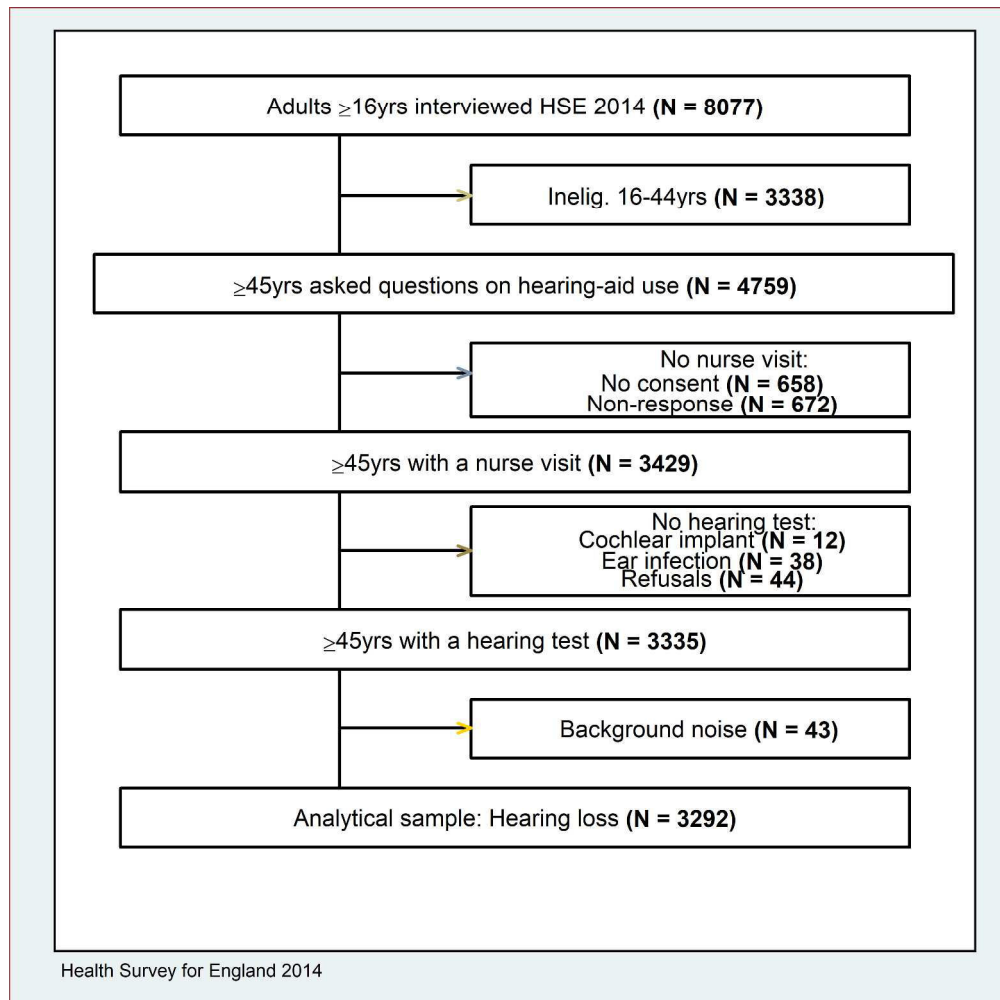

Selection of Study Participants, Health Survey for England 2014

338x338mm (300 x 300 DPI)

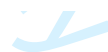

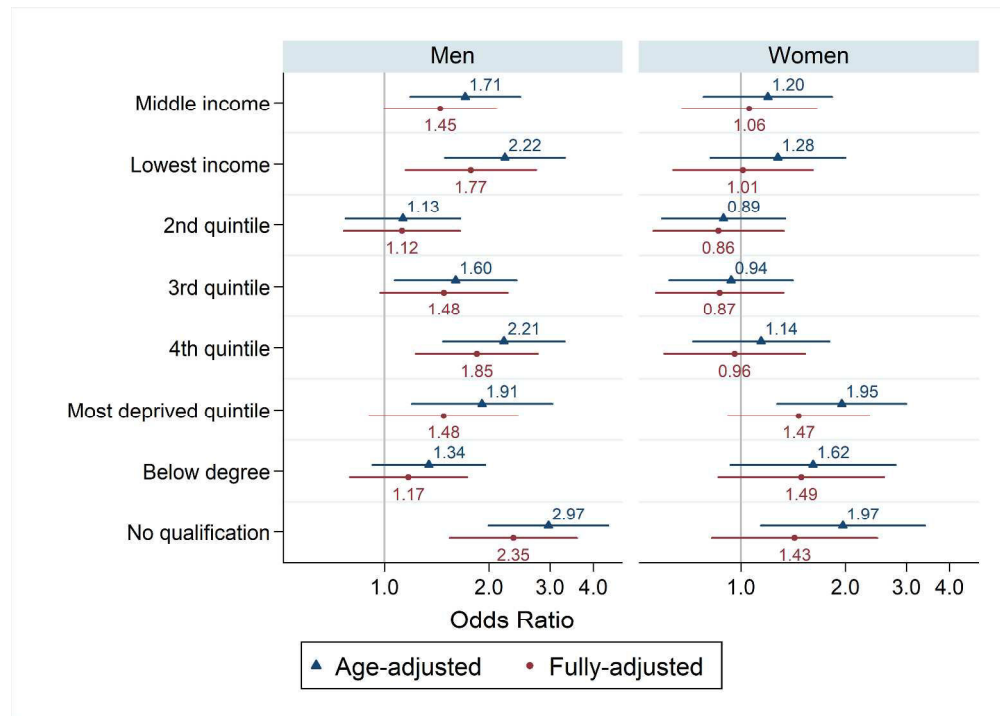

Associations between socioeconomic status (SES) and hearing loss in middle-aged and older adults. Indicators of SES were: equivalised household income tertiles (highest tertile as reference), Index of Multiple Deprivation quintiles (most affluent), and highest educational attainment (degree or higher). Lines represent Odds Ratio (outcome = hearing loss) and its 95% confidence interval. Model A (triangles): adjusted for age. Model B (circles): adjusted for: age, exposure to work-related noise, region, and CVD risk factors (smoking, body mass index, diabetes, hypertension, dyslipidaemia, and physical inactivity).

350x250mm (300 x 300 DPI)

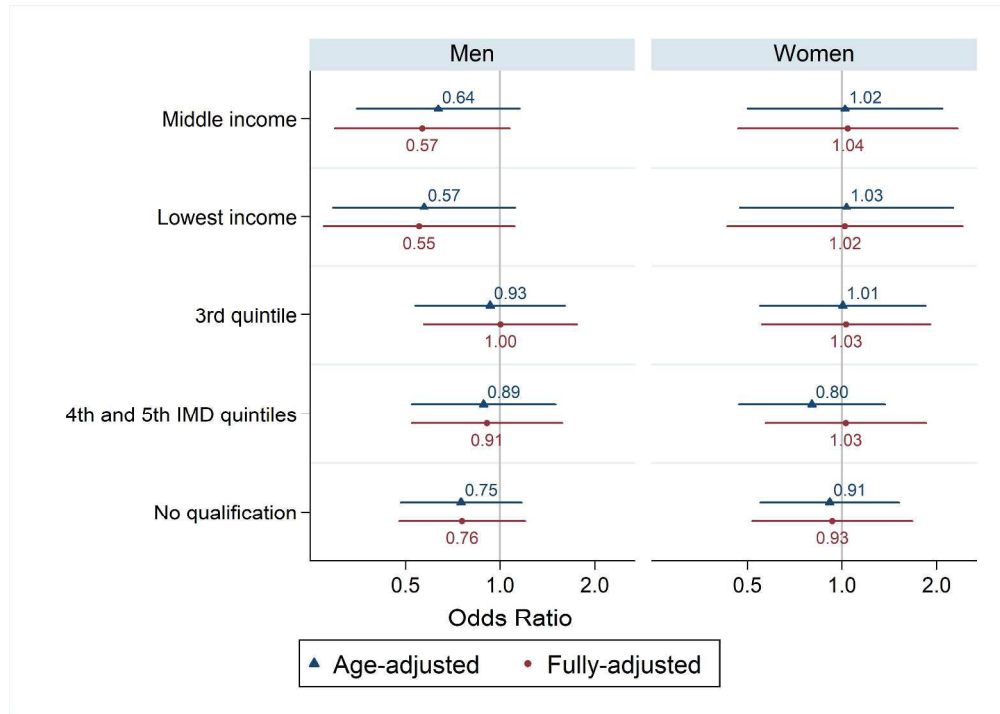

Associations between SES and current hearing aid use in middle-aged and older adults with hearing loss. Indicators of SES were: equivalised household income tertiles (highest tertile as reference), Index of Multiple Deprivation quintiles (least deprived Q1 and Q2), and highest educational attainment (O level or above). Lines represent Odds Ratio (outcome = hearing aid use) and its 95% confidence interval. Model A (triangles): adjusted for age. Model B (circles): adjusted for: age, severity of hearing loss, exposure to work-related noise, region, and CVD risk factors (smoking, body mass index, diabetes, hypertension, dyslipidaemia, and physical inactivity).

350x250mm (300 x 300 DPI)



## STROBE Statement—checklist of items that should be included in reports of observational studies

Scholes S, Biddulph J, Davis AC, Mindell JS. Socioeconomic differences in hearing among middle-aged and older adults: cross-sectional analyses using the Health Survey for England. Submitted to BMJ Open.

|   |                         | <b>Recommendation</b>                                                                                                                                                            | <b>Author response</b>                                                                                                                                                                                                                                                                        |
|---|-------------------------|----------------------------------------------------------------------------------------------------------------------------------------------------------------------------------|-----------------------------------------------------------------------------------------------------------------------------------------------------------------------------------------------------------------------------------------------------------------------------------------------|
| 1 | <b>Title / abstract</b> | (a) Indicate the study's design with a commonly used term in the title or the abstract                                                                                           | Yes. The title of our submitted manuscript is: "Socioeconomic differences in hearing among middle-aged and older adults: <b>cross-sectional analyses</b> using the Health Survey for England".                                                                                                |
|   |                         | (b) Provide in the abstract an informative and balanced summary of what was done and what was found                                                                              | Yes                                                                                                                                                                                                                                                                                           |
| 2 | <b>Introduction</b>     | Explain the scientific background and rationale for the investigation being reported                                                                                             | Yes. The background and rationale for our study are outlined in the Introduction (1 <sup>st</sup> and 2 <sup>nd</sup> paragraphs, respectively).                                                                                                                                              |
| 3 |                         | State specific objectives, including any prespecified hypotheses                                                                                                                 | Yes. The primary and secondary aims are outlined in the second paragraph of the Introduction. We did not have any pre-specified hypotheses.                                                                                                                                                   |
| 4 | Methods                 | <i>Study design</i> : Present key elements of study design early in the paper                                                                                                    | Yes. The first sentence of the Methods Section states that the present study uses data from the Health Survey for England, an annual nationally-representative cross-sectional survey of the non-institutionalised general population.                                                        |
| 5 |                         | <i>Setting</i> : Describe the setting, locations, and relevant dates, including periods of recruitment, exposure, follow-up, and data collection                                 | Yes. The study setting is outlined in the first paragraph of the Methods Section.                                                                                                                                                                                                             |
| 6 |                         | <i>Participants (cross-sectional study)</i> : Give the eligibility criteria, and the sources and methods of selection of participants                                            | Yes. The participants in this study (including eligibility criteria) are described in the 1 <sup>st</sup> and 2 <sup>nd</sup> paragraphs of the Methods section. Figure 1 is a flowchart which shows the derivation of the analytical sample used to estimate the prevalence of hearing loss. |
| 7 |                         | <i>Variables</i> : Clearly define all outcomes, exposures, predictors, potential confounders, and effect modifiers. Give diagnostic criteria, if applicable                      | Yes. The key variables for this study (hearing outcomes; markers of socioeconomic status (SES), and various potential confounders of the SES-hearing associations) are clearly defined under the appropriate heading (hearing loss, socioeconomic status, and covariates)                     |
| 8 |                         | <i>Data sources / measurement</i> : For each variable of interest, give sources of data and details of methods of assessment (measurement). Describe comparability of assessment | Yes, sources of details and methods of assessment are outlined under the appropriate heading (hearing loss, socioeconomic status, and covariates).                                                                                                                                            |

|    |                |                                                                                                                                                                                                                                                                                                                                                                                                      |                                                                                                                                                                                                                                                                                                                                                                                                                                                                                                                                                                                                                                                                                                                                                                                                                                                                                                                                                                   |
|----|----------------|------------------------------------------------------------------------------------------------------------------------------------------------------------------------------------------------------------------------------------------------------------------------------------------------------------------------------------------------------------------------------------------------------|-------------------------------------------------------------------------------------------------------------------------------------------------------------------------------------------------------------------------------------------------------------------------------------------------------------------------------------------------------------------------------------------------------------------------------------------------------------------------------------------------------------------------------------------------------------------------------------------------------------------------------------------------------------------------------------------------------------------------------------------------------------------------------------------------------------------------------------------------------------------------------------------------------------------------------------------------------------------|
|    |                | methods if there is more than one group                                                                                                                                                                                                                                                                                                                                                              |                                                                                                                                                                                                                                                                                                                                                                                                                                                                                                                                                                                                                                                                                                                                                                                                                                                                                                                                                                   |
| 9  |                | <i>Bias</i> Describe any efforts to address potential sources of bias                                                                                                                                                                                                                                                                                                                                | We discussed the potential source of bias through missing data as a result of: (1) survey non-response (main interview and nurse visit); and (2) interviewer-participant communication difficulties through conditions such as deafness. The appropriate non-response weights archived with the data were used in all analyses.<br><br>Potential bias arising from both potential sources of missing data is discussed in the section on Study limitations (see Checklist Item No. 19).                                                                                                                                                                                                                                                                                                                                                                                                                                                                           |
| 10 |                | <i>Study size</i> : Explain how the study size was arrived at.                                                                                                                                                                                                                                                                                                                                       | Yes, Figure 1 shows the derivation of the analytical sample. We explain in the Methods section that participants aged 16-44 years were excluded due to hearing loss being comparatively rare. We explain that the analysis of hearing aid use was carried out only on the subset of participants with hearing loss.                                                                                                                                                                                                                                                                                                                                                                                                                                                                                                                                                                                                                                               |
| 11 |                | Quantitative variables: Explain how quantitative variables were handled in the analyses. If applicable, describe which groupings were chosen and why                                                                                                                                                                                                                                                 | Yes.                                                                                                                                                                                                                                                                                                                                                                                                                                                                                                                                                                                                                                                                                                                                                                                                                                                                                                                                                              |
| 12 |                | <i>Statistical methods</i> : (a) Describe all statistical methods, including those used to control for confounding; (b) Describe any methods used to examine subgroups and interactions; (c) Explain how missing data were addressed; (d) <i>Cross-sectional study</i> —If applicable, describe analytical methods taking account of sampling strategy; (e) <i>Describe any sensitivity analyses</i> | (a) Yes. Firstly, prevalence estimates across subgroups were age-standardised within sex to the 2014 English household population. Secondly, a fully-adjusted model was used to examine the SES-hearing associations. Potential confounders adjusted for in the modelling included age, duration of work-related exposure, and CVD risk factors. Severity of hearing loss was adjusted for in the analysis of hearing aid use.<br><br>(b) Yes, the chi-square test was used to test subgroup differences in hearing outcomes.<br><br>(c) <i>Missing data</i> : analyses were weighted by the nurse-visit weight: this accounts for individual non-participation and preserves the national representativeness of the sample.<br><br>(d) <i>Sampling strategy</i> : the weighting and clustering of participants within PSUs were accounted for by using design-based inference (the complex survey module in Stata).<br><br>(e) <i>Sensitivity analyses</i> : N/A |
| 13 | <b>Results</b> | <i>Participants</i> : (a) Report numbers of individuals at each stage of study—eg numbers potentially eligible, examined for eligibility, confirmed eligible, included in                                                                                                                                                                                                                            | Yes, Reasons for exclusion at each stage of the study are shown in the flow diagram ( <b>Figure 1</b> ).                                                                                                                                                                                                                                                                                                                                                                                                                                                                                                                                                                                                                                                                                                                                                                                                                                                          |

|    |                   |                                                                                                                                                                                                                                                                                                                                                                                                                                |                                                                                                                                                                                                                                                                                                                                                                                                                                                                                                                                                           |
|----|-------------------|--------------------------------------------------------------------------------------------------------------------------------------------------------------------------------------------------------------------------------------------------------------------------------------------------------------------------------------------------------------------------------------------------------------------------------|-----------------------------------------------------------------------------------------------------------------------------------------------------------------------------------------------------------------------------------------------------------------------------------------------------------------------------------------------------------------------------------------------------------------------------------------------------------------------------------------------------------------------------------------------------------|
|    |                   | the study, completing follow-up, and analysed; (b) Give reasons for non-participation at each stage; (c) Consider use of a flow diagram                                                                                                                                                                                                                                                                                        |                                                                                                                                                                                                                                                                                                                                                                                                                                                                                                                                                           |
| 14 |                   | <i>Descriptive data:</i> (a) Give characteristics of study participants (eg demographic, clinical, social) and information on exposures and potential confounders; (b) Indicate number of participants with missing data for each variable of interest                                                                                                                                                                         | Yes, Supplementary Table 1 shows the characteristics of participants aged 45+ with main interview data with and without nurse visit data (including the number of participants with missing data for each variable of interest).                                                                                                                                                                                                                                                                                                                          |
| 15 |                   | <i>Outcome data:</i> Report numbers of outcome events or summary measures                                                                                                                                                                                                                                                                                                                                                      | Yes, we outline the number of participants with hearing loss (769/3292) and the number of participants with hearing loss reporting current use of a hearing aid (264/769). Prevalence estimates are set out in Table 1 (hearing loss) and Table 2 (current hearing aid use).                                                                                                                                                                                                                                                                              |
| 16 |                   | <i>Main results:</i> (a) Give unadjusted estimates and, if applicable, confounder-adjusted estimates and their precision (eg, 95% confidence interval). Make clear which confounders were adjusted for and why they were included; (b) Report category boundaries when continuous variables were categorized; (c) If relevant, consider translating estimates of relative risk into absolute risk for a meaningful time period | We present odds ratios (and accompanying 95% CIs) for the SES-hearing associations in both age-adjusted and fully-adjusted models in Figures 2 and 3. The estimates are displayed graphically to avoid lengthy tables.<br><br>The legends for Figures 2 and 3 make clear which confounders were adjusted for. In the Methods Section we explain that modifiable risk factors for CVD such as diabetes have been independently associated with hearing impairment and are also possible confounders for any observed associations between SES and hearing. |
| 17 |                   | <i>Other analyses:</i> Report other analyses done—eg analyses of subgroups and interactions, and sensitivity analyses                                                                                                                                                                                                                                                                                                          | Yes, the analysis of current hearing aid use is based on the subset of participants with objectively measured hearing loss.                                                                                                                                                                                                                                                                                                                                                                                                                               |
| 18 | <b>Discussion</b> | <i>Key results:</i> Summarise key results with reference to study objectives                                                                                                                                                                                                                                                                                                                                                   | Yes, we summarise the key results with reference to the study objectives in the first paragraph of the Discussion.                                                                                                                                                                                                                                                                                                                                                                                                                                        |
| 19 |                   | <i>Limitations:</i> Discuss limitations of the study, taking into account sources of potential bias or imprecision. Discuss both direction and magnitude of any potential bias                                                                                                                                                                                                                                                 | Yes, the limitations of the study are outlined in the Discussion. Limitations include missing data (accounted for by the use of non-response weighting), the small number of participants with hearing loss, and the unknown influence of unmeasured confounders. We state that since this study utilises cross-sectional data, we could not establish the direction of the observed associations, and we cannot establish causality.                                                                                                                     |
| 20 |                   | <i>Interpretation:</i> Give a cautious overall interpretation of results considering objectives, limitations, multiplicity of                                                                                                                                                                                                                                                                                                  | Yes, in the Discussion we present a cautious overall interpretation of the main findings.                                                                                                                                                                                                                                                                                                                                                                                                                                                                 |

|    |                          |                                                                                                                                                                               |                                                                                                          |
|----|--------------------------|-------------------------------------------------------------------------------------------------------------------------------------------------------------------------------|----------------------------------------------------------------------------------------------------------|
|    |                          | analyses, results from similar studies, and other relevant evidence                                                                                                           |                                                                                                          |
| 21 |                          | <i>Generalisability:</i> Discuss the generalisability (external validity) of the study results                                                                                | Yes                                                                                                      |
| 22 | <b>Other Information</b> | <i>Funding:</i> Give the source of funding and the role of the funders for the present study and, if applicable, for the original study on which the present article is based | The Health Survey for England 2014 was funded by NHS Digital. This particular study received no funding. |

For peer review only

# BMJ Open

## Socioeconomic differences in hearing among middle-aged and older adults: cross-sectional analyses using the Health Survey for England

|                                 |                                                                                                                                                                                                                             |
|---------------------------------|-----------------------------------------------------------------------------------------------------------------------------------------------------------------------------------------------------------------------------|
| Journal:                        | <i>BMJ Open</i>                                                                                                                                                                                                             |
| Manuscript ID                   | bmjopen-2017-019615.R2                                                                                                                                                                                                      |
| Article Type:                   | Research                                                                                                                                                                                                                    |
| Date Submitted by the Author:   | 23-Nov-2017                                                                                                                                                                                                                 |
| Complete List of Authors:       | Scholes, Shaun; UCL, Dept of Epidemiology and Public Health<br>Biddulph, Jane; UCL, Dept of Epidemiology and Public Health<br>Davis, Adrian; UCL, UCL Ear Institute<br>Mindell, Jennifer; UCL, Epidemiology & Public Health |
| <b>Primary Subject Heading</b>: | Ear, nose and throat/otolaryngology                                                                                                                                                                                         |
| Secondary Subject Heading:      | Epidemiology, Public health                                                                                                                                                                                                 |
| Keywords:                       | hearing loss, hearing aids, EPIDEMIOLOGY, social inequalities                                                                                                                                                               |
|                                 |                                                                                                                                                                                                                             |

SCHOLARONE™  
Manuscripts

1  
2  
3 **Socioeconomic differences in hearing among middle-aged and older adults: cross-**  
4 **sectional analyses using the Health Survey for England**  
5

6  
7 Shaun Scholes<sup>1\*</sup>, Jane Biddulph<sup>1</sup>, Adrian Davis<sup>2</sup>, Jennifer S Mindell<sup>1</sup>  
8  
9

10 <sup>1</sup> Department of Epidemiology and Public Health, UCL (University College London),  
11 London, WC1E 6BT, UK  
12

13 <sup>2</sup> UCL Ear Institute, UCL (University College London), London, WC1E 6BT, UK  
14

15 \* Corresponding author: Shaun Scholes, Department of Epidemiology and Public Health,  
16 UCL, 1-19 Torrington Place, London, WC1E 6BT, UK; E-mail: [s.scholes@ucl.ac.uk](mailto:s.scholes@ucl.ac.uk)  
17  
18

19  
20 **Keywords:** hearing loss; hearing aids; surveys; epidemiology; social inequalities  
21  
22  
23  
24  
25  
26  
27  
28  
29  
30  
31  
32  
33  
34  
35  
36  
37  
38  
39  
40  
41  
42  
43  
44  
45  
46  
47  
48  
49  
50  
51  
52  
53  
54  
55  
56  
57  
58  
59  
60

### Strengths and limitations

- Estimates of the burden of hearing loss, the use of hearing aids among persons with hearing loss, and their associations with socioeconomic status, are rarely available from nationally-representative health examination surveys.
- We used data from a screening audiometry device to estimate the prevalence of hearing loss. The prevalence of current hearing aid use was estimated among persons with hearing loss.
- The associations between different markers of socioeconomic status and hearing were examined after adjustment for a wide range of confounders such as age, exposure to work-related noise, and risk factors for cardiovascular disease.
- Exclusion of persons from the study due to difficulties in interviewer-participant communication through conditions such as deafness means that our estimates are likely to underestimate the true prevalence of hearing loss among community-dwelling middle-aged and older adults.

## ABSTRACT

**Background:** Hearing loss impacts on cognitive, social and physical functioning. Both hearing loss and hearing aid use vary across population subgroups. We examined whether hearing loss, and reported current hearing aid use among persons with hearing loss, were associated with different markers of socioeconomic status (SES) in a nationally-representative sample of community-dwelling middle-aged and older adults.

**Methods:** Hearing was measured using an audiometric screening device in the Health Survey for England 2014 (3292 participants aged 45 years and over). Hearing loss was defined as >35dBHL at 3.0 kHz in the better-hearing ear. Using sex-specific logistic regression modelling, we evaluated the associations between SES and hearing after adjustment for potential confounders.

**Results:** 26% of men and 20% of women aged 45 years and over had hearing loss. Hearing loss was higher among men in the lowest SES groups. For example, the multivariable-adjusted odds of hearing loss were almost twice as high for those in the lowest versus the highest income tertile [Odds Ratio (OR): 1.77; 95% CI: 1.15, 2.74]. Among those with hearing loss, 30% of men and 27% of women were currently using a hearing aid. Compared with men in the highest income tertile, the multivariable-adjusted odds of using a hearing aid nowadays were lower for men in the middle (OR: 0.50; 95% CI: 0.25, 0.99) and the lowest (OR: 0.47; 95% CI: 0.23, 0.97) income tertiles. Associations between SES and hearing were weaker or null among women.

**Conclusions:** Whilst the burden of hearing loss fell highest among men in the lowest SES groups, current hearing aid use was demonstrably lower. Initiatives to detect hearing loss early and increase the uptake and the use of hearing aids may provide substantial public health benefits and reduce socioeconomic inequalities in health.



## INTRODUCTION

Hearing loss is well known to impact on cognitive, social and physical functioning.<sup>1-3</sup> It can be congenital, but most is acquired and is sensorineural and irreversible in nature.<sup>4</sup> Preventing hearing loss requires understanding its aetiology and risk factors.<sup>5</sup> Epidemiological studies have shown that hearing loss increases with age<sup>6-8</sup> and increases with the duration of exposure to work-related noise.<sup>8</sup> It is higher among men<sup>6-8</sup>, higher among persons with cardiovascular disease (CVD) risk factors<sup>6,8-11</sup>, and is inversely associated with socioeconomic status (SES).<sup>6-8,12</sup> Early detection and hearing aid use may be effective at ameliorating the impact of hearing loss.<sup>13</sup> However, levels of hearing aid use among persons most likely to benefit are low<sup>14-17</sup>, especially among persons with hearing loss in the lowest SES groups.<sup>14,18-20</sup>

Based on the UK National Study of Hearing conducted in four cities in the early 1980s, 16% of adults aged 17-80 years had a bilateral, and 25% had a unilateral or bilateral, hearing loss.<sup>21</sup> Uptake and use of hearing aids was low, with uptake being 10-30% among persons with hearing loss, and up to 25% of hearing aid owners never using them.<sup>22</sup> To provide up-to-date estimates of the burden of hearing loss, the Health Survey for England (HSE) 2014 included, for the first time in a nationally-representative sample of the population, valid screening audiometry data. The aim of this study was to estimate the prevalence of (1) hearing loss, and (2) current hearing aid use (among persons with hearing loss), in this sample of community-dwelling middle-aged and older adults across population subgroups defined by demographics, work-related noise exposure, and by the presence of CVD risk factors. We also examined the associations between SES and hearing.

## METHODS

### Study population

1  
2  
3 The present study used data from the HSE. The HSE is an annual, nationally-representative  
4 cross-sectional survey of the non-institutionalised general population of all ages. A maximum  
5 of two children per household contributed to the 2014 survey. In households with more than  
6 two children, two were randomly selected using the Kish grid method.<sup>23</sup> Multistage stratified  
7 probability sampling is used with postcode sectors as the primary sampling unit and the  
8 Postcode Address File as the sampling frame for households. Details about the HSE are  
9 described elsewhere.<sup>23</sup> Interview and nurse-visit response rates were 55% and 37%,  
10 respectively. Participants gave verbal consent to be interviewed, visited by a nurse,  
11 participate in a hearing test, and have blood pressure and anthropometric measurements  
12 taken, and gave written consent for blood sampling. Ethical approval was obtained from the  
13 Oxford A Research Ethics Committee (12/SC/0317).

14  
15  
16  
17  
18  
19  
20  
21  
22  
23  
24  
25  
26  
27 Overall, 8077 participants aged 16+ years were interviewed, including questions on the use of  
28 hearing aids (see below). All participants aged 16+ years who had a nurse-visit were eligible  
29 for the hearing test, excluding those with a cochlear implant or with a current ear infection  
30 (Figure 1). Participants aged 16-44 years were excluded due to hearing loss being  
31 comparatively rare ( $n=46$ ). In addition, a number of persons would have been excluded if  
32 interviewer-participant communication difficulties through conditions such as deafness were  
33 sufficient to prevent inclusion in the study. The final analytical sample was 3292 participants.

34  
35  
36  
37  
38  
39  
40  
41  
42  
43 *(Figure 1 here)*

#### 44 45 **Hearing test**

46  
47  
48 Hearing was measured using an audiometric screening device (HearCheck screener, Siemens,  
49 Erlangen, Germany) in participants' own homes. Two evaluation studies comparing the  
50 results of the screener to pure tone audiometry showed good sensitivity (range: 78% to 92%)  
51 and acceptable to good specificity (62% to 95%).<sup>24,25</sup> This handheld device produced a series

1  
2  
3 of three sounds of decreasing volume at 1.0 kHz (55dBHL, 35dBHL and 20dBHL) and then  
4  
5 at 3.0 kHz (75dBHL, 55dBHL and 35dBHL). Both ears were tested, starting with the left.

6  
7 Participants were instructed to indicate when they heard a noise by raising their finger. If an  
8  
9 irregular pattern was found (a combination of responses indicating that quieter sounds were  
10  
11 heard but louder ones were not), the test was repeated at least 60s later for that ear.

12  
13 Participants with an irregular pattern at the first test, but a regular pattern at the second test,  
14  
15 were included in the analyses. Further details of the testing procedures are available  
16  
17 elsewhere.<sup>17</sup>

## 20 **Outcomes**

### 22 *Hearing loss*

23  
24  
25 Hearing loss was defined as >35dBHL at 3.0 kHz in the better-hearing ear, the level at which  
26  
27 intervention has been shown to be definitely beneficial.<sup>26</sup> More specifically, a comparison of  
28  
29 different screen programmes conducted as part of the NHS Health Technology Assessment  
30  
31 Programme showed that hearing loss of >35dBHL at 3.0 kHz was the best predictor (in terms  
32  
33 of the d-prime statistic: a combination of good sensitivity and low false alarm rate) for the  
34  
35 ability of persons to gain the greatest benefit from hearing aids.<sup>26</sup> Hearing loss of >35dBHL  
36  
37 at 3.0 kHz had 88% sensitivity and 10% false alarm rate.<sup>26</sup> Hearing loss was subdivided into  
38  
39 two mutually exclusive categories: (1) ‘moderate loss’ : >35dBHL to 54dBHL (tone not  
40  
41 heard at 35dBHL, but heard at 55dBHL and at 75dBHL), and (2) ‘moderately severe or  
42  
43 severe loss’ : >55dBHL (tone not heard at 35dBHL and at 55dBHL, but the tone may, or may  
44  
45 not, have been heard at 75dBHL). Prevalence estimates were multiplied by the 2014  
46  
47 household population to estimate the number of people with hearing loss.<sup>27</sup>

### 52 *Current hearing aid use*

1  
2  
3 As part of the main interview, all participants were asked if they ever wore a hearing aid  
4 nowadays: those who answered negatively were asked whether they had ever tried one.

5  
6  
7 Current hearing aid use, for the purposes of the present study, consisted of those participants  
8 who answered positively to the question about use of a hearing aid nowadays. Participants  
9 who answered positively to the question about use of a hearing aid nowadays. Participants  
10 classed as not currently using a hearing aid consisted of those who had tried hearing aids in  
11 the past but did not use a hearing aid nowadays, and those who had never tried a hearing aid.  
12  
13  
14

### 15 16 **Markers of socioeconomic status**

17  
18 Tertiles of equivalised household income, quintiles of the area-based Index of Multiple  
19 Deprivation (IMD 2010: Q1 least deprived; Q5 most deprived)<sup>28</sup>, and the highest formal  
20 educational attainment (degree or higher, below degree, no qualifications) were chosen as  
21 related, but different, markers of SES. Broader categories of SES were used for the analysis  
22 of current hearing aid use among persons with hearing loss due to smaller sample sizes. The  
23 IMD 2010 quintiles were recoded into three categories: Q1 and Q2 (least deprived); Q3; and  
24 Q4 and Q5 (most deprived). Educational status was recoded into two categories: O level and  
25 above, and no qualifications.  
26  
27  
28  
29  
30  
31  
32  
33  
34  
35

### 36 37 **Covariates**

38  
39 Covariates were grouped into: (1) demographic characteristics (age, region), (2) exposure to  
40 work-related noise, and (3) risk factors for CVD (cigarette smoking, body mass index,  
41 diabetes, hypertension, dyslipidaemia, and physical inactivity). Modifiable risk factors for  
42 CVD are well-known to be independently associated with hearing impairment<sup>11;29</sup>, and  
43 potentially confound the associations between SES and hearing loss. Age-at-interview was  
44 categorized into four groups (45-54, 55-64, 65-74, and 75+ years). Government Office  
45 Region was grouped into North, Midlands, London, and South. Duration of exposure to  
46 work-related noise was established by asking participants whether they had ever worked in a  
47  
48  
49  
50  
51  
52  
53  
54  
55  
56  
57  
58  
59  
60

1  
2  
3 place that was so noisy that you had to shout to be heard (response categories: 'no', 'yes, for  
4 less than 1 year', 'yes, for at least 1 year but less than 5 years', and 'yes, for 5 years or  
5 longer'). Cigarette smoking status categories were current, ex-regular and never. Single  
6 measurements of height and weight were taken by trained interviewers using standard  
7 protocols. Body mass index (BMI) was computed as weight in kilogrammes (kg) divided by  
8 height in metres squared ( $m^2$ ): participants were classified as normal-weight (18.5-  
9 24.9 $kg/m^2$ ), overweight (25.0-29.9 $kg/m^2$ ), or obese ( $\geq 30.0kg/m^2$ ). We used two indicators of  
10 hyperglycaemia: self-reported physician diagnosis of diabetes, and raised glycated  
11 haemoglobin (HbA1c  $\geq 48mmol/mol$ ) irrespective of diagnosis. Hypertension was defined as  
12 systolic blood pressure  $\geq 140$  mmHg and/or diastolic blood pressure  $\geq 90$  mmHg and/or  
13 current use of medication taken for the purposes of lowering blood pressure. Total cholesterol  
14 was measured in non-fasting blood samples. Dyslipidaemia was defined as total cholesterol  
15  $\geq 5.0mmol/L$  and/or current use of lipid-lowering medication. Based on the Short-Form  
16 International Physical Activity Questionnaire (IPAQ), participants spending  $< 30$  minutes per  
17 week in moderate-to-vigorous physical activity were classed as physically inactive.<sup>30</sup> Broader  
18 categories of these covariates were used in some cases for the analysis of current hearing aid  
19 use due to smaller sample sizes. Age-at-interview was recoded into three categories: 45-64;  
20 65-74; and 75+ years. Duration of exposure to work-related noise was dichotomised into  
21 none and at least some exposure to loud noise.  
22  
23  
24  
25  
26  
27  
28  
29  
30  
31  
32  
33  
34  
35  
36  
37  
38  
39  
40  
41  
42  
43

#### 44 **Statistical analysis**

45  
46 All analyses were sex-specific. Hearing loss prevalence (overall and by severity) was  
47 estimated among the overall population and as stratified by demographic characteristics,  
48 exposure to work-related noise, CVD risk factors, and SES. Prevalence estimates were  
49 directly age-standardised within sex to the English household population using the four age-  
50 groups described above. Differences in the prevalence of hearing loss across groups were  
51  
52  
53  
54  
55  
56  
57

1  
2  
3 evaluated using the chi-square  $\chi^2$  test. This analysis was repeated to estimate the prevalence  
4 of current hearing aid use among those participants with hearing loss.  
5  
6

7  
8 Logistic regression modelling was used to evaluate the association between SES and hearing  
9 loss after adjustment for demographics, exposure to work-related noise, and CVD risk  
10 factors. Associations were summarised using Odds Ratios (OR) with 95% Confidence  
11 Intervals (CI). We decided a priori to run separate models for the three indicators of SES  
12 rather than estimate a single model to avoid multicollinearity. Two sequential models were  
13 fitted. SES and hearing loss associations were age-adjusted (Model A), and then further  
14 adjusted for region, exposure to work-related noise, and CVD risk factors (Model B). To  
15 maximise power age was entered in the models as a continuous variable. SES was entered in  
16 the models as a categorical variable, with the highest status group as the reference category.  
17  
18 We repeated the analyses to evaluate the association between SES and current hearing aid  
19 use, with an additional adjustment for the severity of hearing loss. All analyses accounted for  
20 the complex survey design, incorporating the nurse-visit weight which accounted for  
21 individual non-participation and preserved the national representativeness of the sample. Data  
22 set preparation was performed in SPSS V.20.0 (SPSS IBM Inc., Chicago, Illinois, USA).  
23  
24 Statistical analysis was conducted using Stata V13.1 (College Station, Texas, USA). The  
25 HSE 2014 dataset is available via the UK Data Service (<http://www.ukdataservice.ac.uk>).  
26  
27  
28  
29  
30  
31  
32  
33  
34  
35  
36  
37  
38  
39  
40  
41  
42

## 43 **RESULTS**

44  
45 Compared to participants with data collected from the nurse-visit stage, participants  
46 interviewed in the survey but without data from the nurse-visit were more likely to be in the  
47 lowest income tertile ( $P=0.002$ ), to have no formal educational qualifications ( $P<0.001$ ), to  
48 reside in the most deprived IMD quintile ( $P<0.001$ ), and to be current cigarette smokers  
49 ( $P=0.011$ ) (Supplementary Table 1).  
50  
51  
52  
53  
54  
55  
56  
57  
58  
59  
60

## Hearing loss

Table 1 shows the age-standardised estimates of the prevalence of hearing loss. For simplicity, we present only estimates by age, duration of exposure to work-related noise, and each indicator of SES in the main text, with the estimates for region and for each CVD risk factor available as Supplementary data. Overall, 26% of men and 20% of women aged 45+ years had hearing loss defined as >35dBHL at 3.0 kHz in the better-hearing ear ( $n=769/3292$ ), equivalent to 5.2 million persons. The prevalence of ‘moderate’ loss (15% men, 12% women) exceeded that of ‘moderately severe or severe’ loss (11% men, 7% women). Hearing loss increased monotonically with age, reaching 67% of men and 58% of women aged 75+ years. Only among men in the oldest age-group did the prevalence of ‘moderately severe or severe’ loss (39%) exceed that of ‘moderate’ loss (29%). Among men, hearing loss was higher among those exposed to work-related noise for  $\geq 5$  years ( $P<0.001$ ), in the lowest income tertile ( $P=0.005$ ), residing in areas of higher deprivation ( $P=0.011$ ), and with no formal educational qualifications ( $P<0.001$ ). Patterns among women were similar but the differences in the prevalence of hearing loss across the SES groups did not reach statistical significance ( $P=0.077$  and  $P=0.070$  for IMD and for educational status, respectively). Of the risk factors for CVD, hearing loss was higher among men and women with doctor-diagnosed diabetes ( $P<0.001$  men;  $P=0.005$  women), with elevated Hb1Ac irrespective of diagnosis ( $P<0.001$  men;  $P=0.025$  women), and among women classed as physically inactive ( $P=0.028$ ) (Supplementary Table 2).

*(Table 1 here)*

Figure 2 shows the associations between SES and hearing loss (expressed as odds ratios) after age (Model A) and additional adjustment for region, duration of exposure to work-related noise, and CVD risk factors (Model B). Among men, the multivariable-adjusted associations were partly attenuated: nevertheless, the multivariable-adjusted odds of hearing loss showed a

1  
2  
3 strong socioeconomic gradient. The odds of hearing loss were almost twice as high for men  
4 in the lowest versus the highest income tertile (OR: 1.77; 95% CI: 1.15, 2.74) and were over  
5 twice as high for men with no formal educational qualifications versus those with at least a  
6 degree (OR: 2.35; 95% CI: 1.54, 3.59). For women, the association between SES and hearing  
7 loss did not reach statistical significance. For example, the odds of hearing loss were 1.4  
8 times higher for women with no formal educational qualifications versus those with at least a  
9 degree (OR: 1.43, 95% CI: 0.83, 2.48).  
10  
11  
12  
13  
14  
15  
16  
17  
18  
19  
20

21 *(Figure 2 here)*

### 22 **Current hearing aid use**

23  
24  
25 Among participants with hearing loss, 30% of men and 27% of women wore hearing aids  
26 nowadays ( $n=264/769$ ; Table 2). Lower proportions had tried hearing aids in the past but did  
27 not use a hearing aid nowadays (7% men, 10% women): higher proportions had never tried a  
28 hearing aid (63% men, 64% women) (data not shown). Current use of a hearing aid for  
29 persons with 'moderately severe or severe' loss (53% men, 47% women) exceeded that for  
30 persons with 'moderate' loss (18% men, 19% women) ( $p<0.001$  men;  $p=0.004$  women).  
31  
32  
33  
34  
35  
36  
37  
38  
39  
40  
41  
42  
43  
44  
45  
46  
47  
48  
49  
50  
51  
52  
53  
54  
55  
56  
57  
58  
59  
60

*(Table 2 here)*

Differences in current hearing aid use by population subgroups were typically minor  
( $p>0.05$ ), with the exception of lower use of a hearing aid nowadays among women classed  
as physically inactive ( $p=0.003$ ) (Supplementary Table 3). Lower use among participants  
reporting doctor-diagnosed diabetes ( $n=143/768$ ) did not reach statistical significance  
( $p=0.101$  men;  $p=0.077$  women). Figure 3 shows the associations between SES and current



1  
2  
3 hearing aid use after age- (Model A) and full-adjustment (Model B). Compared with men in  
4 the highest income tertile, the multivariable-adjusted odds of using a hearing aid nowadays  
5 were lower for men in the middle (OR: 0.50; 95% CI: 0.25, 0.99) and the lowest (OR: 0.47;  
6 95% CI: 0.23, 0.97) income tertiles. Among men, area deprivation (as measured by IMD) and  
7 highest educational attainment were associated with current hearing aid use in the same  
8 direction (i.e. lower levels of use in the lower SES groups) but the odds ratios did not reach  
9 statistical significance. For women, SES was not associated with current hearing aid use.  
10  
11  
12  
13  
14  
15  
16  
17

18 *(Figure 3 here)*  
19

## 20 21 **DISCUSSION**

22  
23 In this nationally-representative sample of community-dwelling persons aged 45 years and  
24 over, more than one in four persons had a level of hearing loss that would benefit from  
25 hearing aid use. However, less than one in three persons with hearing loss reported using a  
26 hearing aid nowadays, suggesting a significant level of unmet need. The burden of hearing  
27 loss fell highest among persons in the lowest SES groups, especially among men, suggesting  
28 hearing loss as a source of socioeconomic inequalities in health. Even after adjustment for the  
29 severity of hearing loss, hearing aid use was evidently lower for men in the middle- and low-  
30 income groups compared with their high-income counterparts.  
31  
32  
33  
34  
35  
36  
37  
38  
39  
40

41 Comparisons with previous studies are difficult due to differences in the age-range of  
42 participants.<sup>6</sup> Considerable heterogeneity also exists in the definition and the measurement of  
43 hearing loss.<sup>31</sup> The WHO defines adult disabling hearing impairment as a permanent unaided  
44 hearing threshold for the better-hearing ear of  $\geq 41$  dBHL (averaged over 0.5, 1.0, 2.0 and 4.0  
45 kHz).<sup>32</sup> Using this definition, disabling hearing loss was estimated to affect 360 million  
46 people worldwide in 2012 (more than 5% of the global population).<sup>33</sup> The Global Burden of  
47 Disease Hearing Loss Expert Group uses a threshold of  $>35$  dBHL for all age-groups, and  
48  
49  
50  
51  
52  
53  
54  
55  
56  
57

1  
2  
3 equates “unilateral hearing impairment” with “bilateral mild hearing impairment”.<sup>7</sup> The  
4  
5 estimated global prevalence of hearing loss using this alternative definition was 12% for  
6  
7 males and 10% for females aged  $\geq 15$  in 2008.<sup>7</sup> Analysis of HSE 2014 data by the same  
8  
9 authors of the present study found that 13% of adults (14% men, 12% women) had loss of  
10  
11  $>35$ dBHL at 3.0 kHz in the better-hearing ear.<sup>17</sup> Our findings of differences in the burden of  
12  
13 hearing loss agree with other population-based studies in which the prevalence of hearing  
14  
15 loss was higher for men than women<sup>6-8;34-37</sup>, increased monotonically with age<sup>6-9;21;34-36;38</sup>,  
16  
17 increased with longer exposure to occupational noise<sup>8</sup>, co-existed with CVD risk factors such  
18  
19 as diabetes<sup>6;8-11</sup>, and was higher in the lowest SES groups<sup>6;9;35;36;38;39</sup>, especially for men.<sup>12</sup> In  
20  
21 contrast to other studies<sup>6;8-10</sup>, hearing loss did not vary in the present study by current  
22  
23 smoking status.  
24  
25

26  
27 Other studies have shown similar or lower levels of hearing aid use among persons with  
28  
29 hearing loss. Using the Digit Triplet Test, 21.5% of UK Biobank participants aged 40-69  
30  
31 years with ‘poor’ speech recognition in noise testing reported using a hearing aid.<sup>38</sup> Based on  
32  
33 the 1999-2006 US National Health and Nutrition Examination Survey, hearing aid use among  
34  
35 participants aged 50+ years with hearing loss was 14.2%.<sup>15</sup> Our findings of subgroup  
36  
37 differences in levels of hearing aid use are consistent with other studies which showed that  
38  
39 use increases with age<sup>15;40</sup> and with the severity of hearing loss.<sup>15;19</sup> Our finding of lower  
40  
41 utilisation among men in the lowest SES groups, independent of the severity of hearing loss,  
42  
43 is also consistent with other studies.<sup>18;19;38;40;41</sup>  
44  
45

46  
47 Associations between SES and hearing loss likely involve multiple simultaneous pathways<sup>35</sup>  
48  
49 including other concomitant factors of lower SES such as educational and employment  
50  
51 factors (including exposure to work-related noise), and modifiable lifestyle factors.<sup>8</sup> While  
52  
53 occupational noise is now limited and generally well-controlled in the UK<sup>42</sup>, past exposure  
54  
55 may have had serious long-term consequences for hearing in middle- and older-age.  
56  
57

1  
2  
3 It remains unclear the extent to which hearing loss is a driver of low SES or whether low SES  
4 is a driver of hearing loss.<sup>35</sup> First, analysis in Finland showed that hearing loss early in life –  
5 with its detrimental impact on educational attainment in adolescence – can be a driver of low  
6  
7  
8  
9  
10  
11  
12  
13  
14  
15  
16  
17  
18  
19  
20  
21  
22  
23  
24  
25  
26  
27  
28  
29  
30  
31  
32  
33  
34  
35  
36  
37  
38  
39  
40  
41  
42  
43  
44  
45  
46  
47  
48  
49  
50  
51  
52  
53  
54  
55  
56  
57  
58  
59  
60

It remains unclear the extent to which hearing loss is a driver of low SES or whether low SES is a driver of hearing loss.<sup>35</sup> First, analysis in Finland showed that hearing loss early in life – with its detrimental impact on educational attainment in adolescence – can be a driver of low SES in young adulthood through fewer opportunities for entering into higher education and through more frequent spells of unemployment.<sup>43</sup> Secondly, longitudinal studies have suggested low SES to be a key driver of hearing loss in middle-to-older age through factors such as working in jobs with a greater potential for exposure to damaging levels of noise. For example, analysis of the Beaver Dam Eye Study showed that the development of incident hearing loss was more likely among participants with lower levels of educational attainment and among those participants who worked in industrial occupations versus management and professional positions.<sup>37;44</sup>

The diabetes-hearing loss associations found in our study are in agreement with a recent meta-analysis.<sup>45</sup> Explanations for the association between diabetes and hearing loss include the microvascular and neuropathic complications that affect diabetics in multiple organ systems which may also affect the inner ear.<sup>46;47</sup> This study confirms the low level of current hearing aid use, especially among men in the lowest SES groups. Previous studies have demonstrated non-financial barriers to uptake and use, with self-recognition of hearing problems being the strongest factor.<sup>48</sup> Low take-up and use are typically attributed to a perception of hearing loss being an expected consequence of ageing. Non-audiological drivers for older adults with hearing impairment consulting a health professional and/or to use hearing aids included a positive attitude to hearing aids (their own and from significant others) and self-efficacy about hearing aids (e.g. placement and battery removal).<sup>49</sup> Although treatment and hearing aid provision is financially supported in the UK through the National Health Service, persons in the lower SES groups use specialist health services less frequently than those in higher SES groups.<sup>50</sup>

1  
2  
3 The main strength of this study was the use of valid screening audiometry data within a  
4 nationally-representative health examination survey. Data from a hearing test overcomes the  
5 under-estimation of socioeconomic inequalities in health that are typically associated with  
6 self-reports.<sup>51</sup> Other analyses of HSE 2014 showed that socioeconomic inequalities in hearing  
7 were most apparent using the data from the audiometric screening device but not from the  
8 self-report data<sup>17</sup>, partly reflecting differences in levels of expectations, and differences in  
9 levels of awareness of adverse health conditions.<sup>52</sup> This study also has a number of  
10 limitations. Differences in the propensity to respond at the nurse-visit may have weakened the  
11 sample's representativeness and reduced the generalizability of our findings, but the use of  
12 statistical weights to account for the biases in individual participation would have mitigated  
13 this to a considerable extent. The estimates of hearing loss prevalence are conservative due to  
14 the exclusion of: (1) the institutionalised population, (2) individuals with a cochlear implant  
15 or with a current ear infection, and (3) the exclusion of an unknown number of individuals  
16 with conditions such as deafness that were judged to impede interviewer-participant  
17 communication. The relatively small number of participants with hearing loss may have  
18 resulted in our analyses of current hearing aid use to be underpowered to detect differences  
19 among subgroups. For the same reason, we were unable to examine differences in utilisation  
20 among subgroups stratified by the severity of hearing loss. Insufficient numbers meant that  
21 we were unable to provide separate reliable estimates for minority ethnic groups. Our  
22 findings could have been influenced by unmeasured confounders such as the duration of  
23 exposure to non-occupational noise. Lastly, since we utilised cross-sectional data, we were  
24 unable to assess the temporal relationship between SES and hearing, and so could not  
25 establish causality.

26  
27  
28  
29  
30  
31  
32  
33  
34  
35  
36  
37  
38  
39  
40  
41  
42  
43  
44  
45  
46  
47  
48  
49  
50  
51  
52  
53 In conclusion, hearing loss is highly prevalent, affecting more than one in four men and  
54 affecting one in five women. However, less than one in three persons with hearing loss

1  
2  
3 reported using a hearing aid nowadays, suggesting a significant level of unmet need. Whilst  
4 the burden of hearing loss falls highest among persons, but especially men, in the lowest SES  
5 groups, use of hearing aids is demonstrably lower. Initiatives to detect hearing loss early, and  
6 the increased uptake of hearing aids, may provide substantial public health benefits and  
7 reduce socioeconomic inequalities in health.  
8  
9  
10  
11  
12

### 13 14 **Contributors**

15  
16 SS, JB, AD and JM were responsible for developing the design of the study.  
17 SS was responsible for conducting the analyses, interpreting the results, and drafting the  
18 manuscript. SS, JB, AD and JM critically revised the manuscript. All authors have read and  
19 approved the final manuscript.  
20  
21

### 22 23 **Funding**

24  
25 This research received no specific grant from any funding agency in the public, commercial  
26 or not-for-profit sectors.  
27  
28

### 29 30 **Competing Interests**

31  
32 None.  
33  
34

### 35 36 **Data sharing**

37  
38 The Health Survey for England 2014 dataset is available via the UK Data Service  
39 (<http://www.ukdataservice.ac.uk>). Statistical code is available from the corresponding author  
40 at [s.scholes@ucl.ac.uk](mailto:s.scholes@ucl.ac.uk)  
41  
42  
43  
44  
45  
46  
47  
48  
49  
50  
51  
52  
53  
54  
55  
56  
57

**Table 1** Age-standardised prevalence (%) and standard error (SE) of hearing loss, persons aged 45 years and over, HSE 2014

| Characteristics                                 | Males |                                  |                              |                                        |                      | Females |                                  |                              |                                        |                      |
|-------------------------------------------------|-------|----------------------------------|------------------------------|----------------------------------------|----------------------|---------|----------------------------------|------------------------------|----------------------------------------|----------------------|
|                                                 | n     | Hearing loss % (SE) <sup>*</sup> | Moderate % (SE) <sup>†</sup> | Moderate to severe % (SE) <sup>‡</sup> | P-value <sup>§</sup> | n       | Hearing loss % (SE) <sup>*</sup> | Moderate % (SE) <sup>†</sup> | Moderate to severe % (SE) <sup>‡</sup> | P-value <sup>§</sup> |
| N                                               | 1485  | 425                              | 244                          | 181                                    |                      | 1807    | 344                              | 217                          | 127                                    |                      |
| All                                             | 1485  | 26.2 (1.2)                       | 15.2 (1.0)                   | 11.0 (0.9)                             | -                    | 1807    | 19.6 (1.0)                       | 12.2 (0.8)                   | 7.4 (0.7)                              |                      |
| <b>Age-group:</b>                               |       |                                  |                              |                                        |                      |         |                                  |                              |                                        |                      |
| 45-54                                           | 420   | 8.0 (1.5)                        | 7.0 (1.4)                    | 1.0 (0.5)                              | <0.001               | 560     | 3.1 (0.9)                        | 2.3 (0.7)                    | 0.7 (0.4)                              | <0.001               |
| 55-64                                           | 401   | 17.0 (2.0)                       | 10.9 (1.7)                   | 6.1 (1.2)                              |                      | 446     | 10.6 (1.6)                       | 8.6 (1.4)                    | 2.0 (0.7)                              |                      |
| 65-74                                           | 402   | 37.0 (2.5)                       | 23.8 (2.2)                   | 13.3 (2.0)                             |                      | 476     | 20.4 (1.8)                       | 14.5 (1.6)                   | 5.9 (1.1)                              |                      |
| 75+                                             | 262   | 67.3 (3.2)                       | 28.6 (2.8)                   | 38.7 (3.1)                             |                      | 325     | 57.9 (2.9)                       | 30.6 (2.5)                   | 27.3 (2.6)                             |                      |
| <b>Duration of work-related noise exposure:</b> |       |                                  |                              |                                        |                      |         |                                  |                              |                                        |                      |
| None                                            | 819   | 22.2 (1.6)                       | 13.4 (1.3)                   | 8.9 (1.2)                              | <0.001               | 1468    | 18.6 (1.1)                       | 12.1 (0.9)                   | 6.5 (0.7)                              | 0.091                |
| Less than 5 years                               | 226   | 24.6 (2.9)                       | 11.1 (2.3)                   | 13.5 (2.4)                             |                      | 128     | 18.8 (3.8)                       | 10.8 (3.0)                   | 7.9 (2.7)                              |                      |
| 5+ years                                        | 434   | 35.1 (2.5)                       | 21.5 (2.1)                   | 13.6 (1.7)                             |                      | 210     | 25.4 (3.0)                       | 13.6 (2.4)                   | 11.8 (2.2)                             |                      |
| <b>Income tertiles:</b>                         |       |                                  |                              |                                        |                      |         |                                  |                              |                                        |                      |
| Highest                                         | 491   | 21.3 (2.5)                       | 13.1 (2.0)                   | 8.2 (1.7)                              | 0.005                | 484     | 16.5 (2.3)                       | 11.0 (1.9)                   | 5.5 (1.4)                              | 0.413                |
| Middle                                          | 458   | 28.6 (2.2)                       | 16.7 (1.9)                   | 12.0 (1.5)                             |                      | 562     | 19.3 (1.8)                       | 11.9 (1.4)                   | 7.4 (1.2)                              |                      |
| Lowest                                          | 305   | 32.9 (2.8)                       | 19.8 (2.2)                   | 13.1 (2.0)                             |                      | 417     | 20.1 (1.9)                       | 13.1 (1.6)                   | 7.0 (1.2)                              |                      |
| <b>Index of Multiple Deprivation quintiles:</b> |       |                                  |                              |                                        |                      |         |                                  |                              |                                        |                      |
| Least deprived                                  | 369   | 21.4 (2.2)                       | 11.0 (1.8)                   | 10.3 (1.7)                             | 0.011                | 448     | 18.6 (2.1)                       | 11.4 (1.5)                   | 7.2 (1.4)                              | 0.077                |
| 2                                               | 340   | 23.0 (2.4)                       | 13.2 (1.8)                   | 9.8 (1.7)                              |                      | 407     | 17.6 (1.7)                       | 11.5 (1.5)                   | 6.1 (1.2)                              |                      |
| 3                                               | 311   | 27.2 (2.7)                       | 17.1 (2.3)                   | 10.1 (1.8)                             |                      | 392     | 17.5 (2.1)                       | 10.9 (1.7)                   | 6.6 (1.5)                              |                      |
| 4                                               | 255   | 32.6 (2.9)                       | 18.2 (2.5)                   | 14.4 (2.2)                             |                      | 312     | 19.8 (2.6)                       | 10.6 (2.1)                   | 9.2 (1.7)                              |                      |
| Most deprived                                   | 210   | 30.2 (3.3)                       | 18.0 (2.6)                   | 12.2 (2.6)                             |                      | 248     | 26.3 (2.7)                       | 18.4 (2.4)                   | 7.9 (1.7)                              |                      |
| <b>Education status:</b>                        |       |                                  |                              |                                        |                      |         |                                  |                              |                                        |                      |
| Degree or higher                                | 344   | 20.1 (2.6)                       | 12.3 (2.1)                   | 7.8 (1.7)                              | <0.001               | 309     | 14.5 (3.5)                       | 7.8 (2.2)                    | 6.7 (2.5)                              | 0.070                |
| Below degree                                    | 733   | 23.2 (1.8)                       | 12.8 (1.3)                   | 10.4 (1.4)                             |                      | 941     | 18.4 (1.6)                       | 12.1 (1.2)                   | 6.4 (1.1)                              |                      |
| No qualifications                               | 407   | 40.1 (3.0)                       | 26.5 (2.9)                   | 13.7 (1.7)                             |                      | 555     | 23.6 (2.1)                       | 14.7 (1.8)                   | 8.9 (1.1)                              |                      |

\* Hearing loss: >35dBHL at 3.0 kHz (tone not heard at 35dBHL).

† Moderate loss: >35 to 54dBHL (tone not heard at 35dBHL, but heard at 55 and at 75dBHL).

1  
2 ‡ Moderately severe or severe loss: >55 dBHL (tone not heard at 35 and at 55dBHL, but may or may not have heard the tone at 75dBHL).  
3 § Prevalence of hearing loss (>35dBHL at 3.0 kHz in the better hearing ear) across the categories of each variable (age-group; duration of work-  
4 related noise exposure; income tertiles; Index of Multiple Deprivation quintiles; and highest educational attainment) were compared using the  
5 Chi-square ( $\chi^2$ ) tests. No adjustment to the p-values for multiple comparisons was made.  
6  
7  
8  
9  
10  
11  
12  
13  
14  
15  
16  
17  
18  
19  
20  
21  
22  
23  
24  
25  
26  
27  
28  
29  
30  
31  
32  
33  
34  
35  
36  
37  
38  
39  
40  
41  
42  
43  
44  
45  
46  
47

For peer review only

**Table 2** Age-standardized prevalence (%) and standard error (SE) of hearing aid use among persons with hearing loss, persons aged 45 years and over, HSE 2014

| Characteristics                                 | Men |                        |                  | Women |                        |                  |
|-------------------------------------------------|-----|------------------------|------------------|-------|------------------------|------------------|
|                                                 | N   | Hearing aid use % (SE) | <i>P</i> -value* | N     | Hearing aid use % (SE) | <i>P</i> -value* |
| N                                               | 425 | 29.7 (3.1)             |                  | 344   | 26.9 (3.3)             |                  |
| <b>Severity of loss:</b>                        |     |                        |                  |       |                        |                  |
| Moderate <sup>†</sup>                           | 244 | 17.8 (3.2)             | <0.001           | 217   | 19.1 (3.5)             | 0.002            |
| Moderate to severe <sup>‡</sup>                 | 181 | 52.9 (6.3)             |                  | 127   | 47.1 (8.7)             |                  |
| <b>Age-group:</b>                               |     |                        |                  |       |                        |                  |
| 45-64                                           | 101 | 25.4 (4.6)             | 0.056            | 63    | 21.2 (5.1)             | 0.035            |
| 65-74                                           | 147 | 34.3 (4.3)             |                  | 94    | 31.4 (4.9)             |                  |
| 75+                                             | 177 | 40.2 (3.7)             |                  | 187   | 39.1 (3.7)             |                  |
| <b>Duration of work-related noise exposure:</b> |     |                        |                  |       |                        |                  |
| None                                            | 250 | 26.1 (3.9)             | 0.234            | 287   | 25.3 (3.6)             | 0.296            |
| Some                                            | 173 | 33.5 (4.9)             |                  | 56    | 35.5 (9.4)             |                  |
| <b>Income tertiles:</b>                         |     |                        |                  |       |                        |                  |
| Highest                                         | 84  | 36.0 (6.5)             | 0.548            | 54    | 24.7 (6.5)             | 0.900            |
| Middle                                          | 149 | 31.2 (5.5)             |                  | 105   | 28.6 (5.8)             |                  |
| Lowest                                          | 118 | 26.0 (6.1)             |                  | 90    | 26.0 (7.0)             |                  |
| <b>Index of Multiple Deprivation quintiles:</b> |     |                        |                  |       |                        |                  |
| Least deprived 1 & 2                            | 179 | 29.8 (5.3)             | 0.812            | 158   | 29.1 (5.2)             | 0.615            |
| Quintile 3                                      | 101 | 33.5 (8.0)             |                  | 66    | 29.3 (6.6)             |                  |
| Most deprived 4 & 5                             | 145 | 27.9 (4.6)             |                  | 120   | 22.6 (5.6)             |                  |
| <b>Education status:</b>                        |     |                        |                  |       |                        |                  |
| O level or above                                | 227 | 32.3 (4.2)             | 0.354            | 151   | 28.0 (4.3)             | 0.654            |
| No qualifications                               | 198 | 26.3 (4.6)             |                  | 192   | 24.7 (5.6)             |                  |

\* Prevalence of current hearing aid use across the categories of each variable (age-group; duration of work-related noise exposure; income tertiles; Index of Multiple Deprivation



quintiles; and highest educational attainment) were compared using the Chi-square ( $\chi^2$ ) test. No adjustment to the p-values for multiple comparisons was made.

† Moderate loss: >35 to 54dBHL (tone not heard at 35dBHL, but tone heard at 55 and 75dBHL).

‡ Moderately severe or severe loss: >55dBHL (tone not heard at 35 and 55dBHL, but may or may not have heard the tone at 75dBHL).

For peer review only

## Reference List

- (1) Lin FR, Yaffe K, Xia J, Xue QL, Harris TB, Purchase-Helzner E et al. Hearing loss and cognitive decline in older adults. *JAMA Intern Med* 2013; 173(4):293-299.
- (2) Lin FR, Metter EJ, O'Brien RJ, Resnick SM, Zonderman AB, Ferrucci L. Hearing loss and incident dementia. *Arch Neurol* 2011; 68(2):214-220.
- (3) Surprenant AM, DiDonato R. Community-dwelling older adults with hearing loss experience greater decline in cognitive function over time than those with normal hearing. *Evid Based Nurs* 2014;17:60-61.
- (4) World Health Organization. Prevention of noise-induced hearing loss. 1997.
- (5) Olusanya BO, Neumann KJ, Saunders JE. The global burden of disabling hearing impairment: a call to action. *Bull World Health Organ* 2014; 92(5):367-373.
- (6) Agrawal Y, Platz EA, Niparko JK. Prevalence of hearing loss and differences by demographic characteristics among US adults: data from the National Health and Nutrition Examination Survey, 1999-2004. *Arch Intern Med* 2008; 168(14):1522-1530.
- (7) Stevens G, Flaxman S, Brunskill E, Mascarenhas M, Mathers CD, Finucane M. Global and regional hearing impairment prevalence: an analysis of 42 studies in 29 countries. *Eur J Public Health* 2013; 23(1):146-152.
- (8) Hoffman HJ, Dobie RA, Losonczy KG, Themann CL, Flamme GA. Declining Prevalence of Hearing Loss in US Adults Aged 20 to 69 Years. *JAMA Otolaryngol Head Neck Surg* 2017;143(3):274-285.
- (9) Rigtters SC, Metselaar M, Wieringa MH, Baatenburg de Jong RJ, Hofman A, Goedegebure A. Contributing Determinants to Hearing Loss in Elderly Men and Women: Results from the Population-Based Rotterdam Study. *Audiol Neurootol* 2016; 21 Suppl 1:10-15.
- (10) Agrawal Y, Platz EA, Niparko JK. Risk factors for hearing loss in US adults: data from the National Health and Nutrition Examination Survey, 1999 to 2002. *Otol Neurotol* 2009; 30(2):139-145.
- (11) Kim MB, Zhang Y, Chang Y, Ryu S, Choi Y, Kwon MJ et al. Diabetes mellitus and the incidence of hearing loss: a cohort study. *Int J Epidemiol* 2017;46(2):717-726.
- (12) Helvik AS, Krokstad S, Tambs K. Socioeconomic inequalities in hearing loss in a healthy population sample: The HUNT Study. *Am J Public Health* 2009; 99(8):1376-1378.
- (13) Peracino A, Pecorelli S. The Epidemiology of Cognitive Impairment in the Aging Population: Implications for Hearing Loss. *Audiol Neurootol* 2016; 21 Suppl 1:3-9.

- 1  
2  
3  
4  
5  
6  
7  
8  
9  
10  
11  
12  
13  
14  
15  
16  
17  
18  
19  
20  
21  
22  
23  
24  
25  
26  
27  
28  
29  
30  
31  
32  
33  
34  
35  
36  
37  
38  
39  
40  
41  
42  
43  
44  
45  
46  
47  
48  
49  
50  
51  
52  
53  
54  
55  
56  
57  
58  
59  
60
- (14) Popelka MM, Cruickshanks KJ, Wiley TL, Tweed TS, Klein BE, Klein R. Low prevalence of hearing aid use among older adults with hearing loss: the Epidemiology of Hearing Loss Study. *J Am Geriatr Soc* 1998; 46(9):1075-1078.
  - (15) Chien W, Lin FR. Prevalence of hearing aid use among older adults in the United States. *Arch Intern Med* 2012; 172(3):292-293.
  - (16) Hartley D, Rochtchina E, Newall P, Golding M, Mitchell P. Use of hearing AIDS and assistive listening devices in an older Australian population. *J Am Acad Audiol* 2010; 21(10):642-653.
  - (17) Scholes S, Mindell J. Hearing. In: Craig R, Mindell J, editors. Health Survey for England 2014 Volume 1 Health, social care and lifestyles. Leeds: Health and Social Care Information Centre; 2015.
  - (18) Nieman CL, Marrone N, Szanton SL, Thorpe RJ, Jr., Lin FR. Racial/Ethnic and Socioeconomic Disparities in Hearing Health Care Among Older Americans. *J Aging Health* 2016; 28(1):68-94.
  - (19) Helvik AS, Krokstad S, Tambs K. How sociodemographic and hearing related factors were associated with use of hearing aid in a population-based study: The HUNT Study. *BMC Ear Nose Throat Disord* 2016; 16:8.
  - (20) Mamo SK, Nieman CL, Lin FR. Prevalence of Untreated Hearing Loss by Income among Older Adults in the United States. *J Health Care Poor Underserved* 2016; 27(4):1812-1818.
  - (21) Davis AC. The prevalence of hearing impairment and reported hearing disability among adults in Great Britain. *Int J Epidemiol* 1989; 18(4):911-917.
  - (22) Davis A. Hearing in adults. London: Whurr; 1995.
  - (23) Mindell J, Biddulph JP, Hirani V, Stamatakis E, Craig R, Nunn S et al. Cohort profile: the health survey for England. *Int J Epidemiol* 2012; 41(6):1585-1593.
  - (24) Parving A, Sørup Sørensen M, Christensen B, Davis A. Evaluation of a hearing screener. *Audiological Medicine* 2008; 6(2):115-119.
  - (25) Fellizar-Lopez KR, Abes GT, Reyes-Quintos M, Rina T, Tantoco M, Leah S. Accuracy of Siemens HearCheck™ Navigator as a Screening Tool for Hearing Loss. *Philippine Journal of Otolaryngology Head and Neck Surgery* 2011; 26(1):10-15.
  - (26) Davis A, Smith P, Ferguson M, Stephens D, Gianopoulos I. Acceptability, benefit and costs of early screening for hearing disability: a study of potential screening tests and models. *Health Technol Assess* 2007; 11(42):1-294.
  - (27) Office for National Statistics. Population estimates for UK, England and Wales, Scotland and Northern Ireland: mid-2014 and mid-2013. 2015. ([www.ons.gov.uk/peoplepopulationandcommunity/populationandmigration/populationestimates/bulletins/annualmidyearpopulationestimates/2015-06-25](http://www.ons.gov.uk/peoplepopulationandcommunity/populationandmigration/populationestimates/bulletins/annualmidyearpopulationestimates/2015-06-25))
  - (28) Department for Communities and Local Government. The English Indices of deprivation 2010. 2011. London, Department for Communities and Local Government. ([www.gov.uk/government/uploads/system/uploads/attachment\\_data/file/6871/1871208.pdf](http://www.gov.uk/government/uploads/system/uploads/attachment_data/file/6871/1871208.pdf))

- 1  
2  
3  
4  
5  
6  
7  
8  
9  
10  
11  
12  
13  
14  
15  
16  
17  
18  
19  
20  
21  
22  
23  
24  
25  
26  
27  
28  
29  
30  
31  
32  
33  
34  
35  
36  
37  
38  
39  
40  
41  
42  
43  
44  
45  
46  
47  
48  
49  
50  
51  
52  
53  
54  
55  
56  
57  
58  
59  
60
- (29) Fischer ME, Schubert CR, Nondahl DM, Dalton DS, Huang GH, Keating BJ et al. Subclinical atherosclerosis and increased risk of hearing impairment. *Atherosclerosis* 2015; 238(2):344-349.
- (30) Scholes S, Bridges S, Ng FL, Mindell JS. Comparison of the Physical Activity and Sedentary Behaviour Assessment Questionnaire and the Short-Form International Physical Activity Questionnaire: An Analysis of Health Survey for England Data. *PLoS One* 2016; 11(3):e0151647.
- (31) Roth TN, Hanebuth D, Probst R. Prevalence of age-related hearing loss in Europe: a review. *Eur Arch Otorhinolaryngol* 2011; 268(8):1101-1107.
- (32) World Health Organization. Prevention of blindness and deafness. Grades of hearing impairment. 2013.
- (33) World Health Organization. Global estimates on prevalence of hearing loss. 2012.
- (34) Goman AM, Lin FR. Prevalence of Hearing Loss by Severity in the United States. *Am J Public Health* 2016; 106(10):1820-1822.
- (35) Emmett SD, Francis HW. The socioeconomic impact of hearing loss in U.S. adults. *Otol Neurotol* 2015; 36(3):545-550.
- (36) Cruickshanks KJ, Wiley TL, Tweed TS, Klein BE, Klein R, Mares-Perlman JA et al. Prevalence of hearing loss in older adults in Beaver Dam, Wisconsin. The Epidemiology of Hearing Loss Study. *Am J Epidemiol* 1998; 148(9):879-886.
- (37) Cruickshanks KJ, Nondahl DM, Tweed TS, Wiley TL, Klein BE, Klein R et al. Education, occupation, noise exposure history and the 10-yr cumulative incidence of hearing impairment in older adults. *Hear Res* 2010; 264(1-2):3-9.
- (38) Dawes P, Fortnum H, Moore DR, Emsley R, Norman P, Cruickshanks K et al. Hearing in middle age: a population snapshot of 40- to 69-year olds in the United Kingdom. *Ear Hear* 2014; 35(3):e44-e51.
- (39) Davis AC, Ecob R, Smith P. The relationship between work-based noise over the adult life course and hearing in middle age. *Int J Audiol* 2008; 47:100-108.
- (40) Bainbridge KE, Ramachandran V. Hearing aid use among older U.S. adults; the national health and nutrition examination survey, 2005-2006 and 2009-2010. *Ear Hear* 2014; 35(3):289-294.
- (41) Davis AC. Epidemiological profile of hearing impairments: the scale and nature of the problem with special reference to the elderly. *Acta Otolaryngol Suppl* 1990; 476:23-31.
- (42) Lutman M, Davis AC, Ferguson M. Epidemiological evidence for the effectiveness of the noise at work regulations. 2008. Health and Safety Executive.
- (43) Jarvelin MR, Maki-Torkko E, Sorri MJ, Rantakallio PT. Effect of hearing impairment on educational outcomes and employment up to the age of 25 years in northern Finland. *Br J Audiol* 1997; 31(3):165-175.
- (44) Cruickshanks KJ, Tweed TS, Wiley TL, Klein BE, Klein R, Chappell R et al. The 5-year incidence and progression of hearing loss: the epidemiology of hearing loss study. *Arch Otolaryngol Head Neck Surg* 2003; 129(10):1041-1046.

- 1  
2  
3  
4  
5  
6  
7  
8  
9  
10  
11  
12  
13  
14  
15  
16  
17  
18  
19  
20  
21  
22  
23  
24  
25  
26  
27  
28  
29  
30  
31  
32  
33  
34  
35  
36  
37  
38  
39  
40  
41  
42  
43  
44  
45  
46  
47  
48  
49  
50  
51  
52  
53  
54  
55  
56  
57  
58  
59  
60
- (45) Horikawa C, Kodama S, Tanaka S, Fujihara K, Hirasawa R, Yachi Y et al. Diabetes and risk of hearing impairment in adults: a meta-analysis. *J Clin Endocrinol Metab* 2013; 98(1):51-58.
- (46) Friedman SA, Schulman RH, Weiss S. Hearing and diabetic neuropathy. *Arch Intern Med* 1975; 135(4):573-576.
- (47) Fukushima H, Cureoglu S, Schachern PA, Paparella MM, Harada T, Oktay MF. Effects of type 2 diabetes mellitus on cochlear structure in humans. *Arch Otolaryngol Head Neck Surg* 2006; 132(9):934-938.
- (48) Knudsen LV, Oberg M, Nielsen C, Naylor G, Kramer SE. Factors influencing help seeking, hearing aid uptake, hearing aid use and satisfaction with hearing aids: a review of the literature. *Trends Amplif* 2010; 14(3):127-154.
- (49) Meyer C, Hickson L, Lovelock K, Lampert M, Khan A. An investigation of factors that influence help-seeking for hearing impairment in older adults. *Int J Audiol* 2014; 53 Suppl 1:S3-17.
- (50) Capewell S, Graham H. Will cardiovascular disease prevention widen health inequalities? *PLoS Med* 2010; 7(8):e1000320.
- (51) Chatterji P, Joo H, Lahiri K. EXAMINING THE EDUCATION GRADIENT IN CHRONIC ILLNESS. *Educ Econ* 2015; 23(6):735-750.
- (52) Johnston DW, Propper C, Shields MA. Comparing subjective and objective measures of health: Evidence from hypertension for the income/health gradient. *J Health Econ* 2009; 28(3):540-552.

**FIGURE 1 LEGEND**

Selection of Study Participants, Health Survey for England 2014

**FIGURE 2 LEGEND**

Association between socioeconomic status (SES) and hearing loss in middle-aged and older adults. Indicators of SES were: equivalised household income tertiles (highest tertile as reference), Index of Multiple Deprivation quintiles (most affluent), and highest educational attainment (degree or higher). Lines represent Odds Ratio (outcome = hearing loss) and its 95% confidence interval. Model A (triangles): adjusted for age. Model B (circles): adjusted for: age, exposure to work-related noise, region, and CVD risk factors (smoking, body mass index, diabetes, hypertension, dyslipidaemia, and physical inactivity).

**FIGURE 3 LEGEND**

Association between SES and current hearing aid use in middle-aged and older adults with hearing loss. Indicators of SES were: equivalised household income tertiles (highest tertile as reference), Index of Multiple Deprivation quintiles (least deprived Q1 and Q2), and highest educational attainment (O level and above). Lines represent Odds Ratio (outcome = hearing aid use) and its 95% confidence interval. Model A (triangles): adjusted for age. Model B (circles): adjusted for: age, severity of hearing loss, exposure to work-related noise, region, and CVD risk factors (smoking, body mass index, diabetes, hypertension, dyslipidaemia, and physical inactivity).

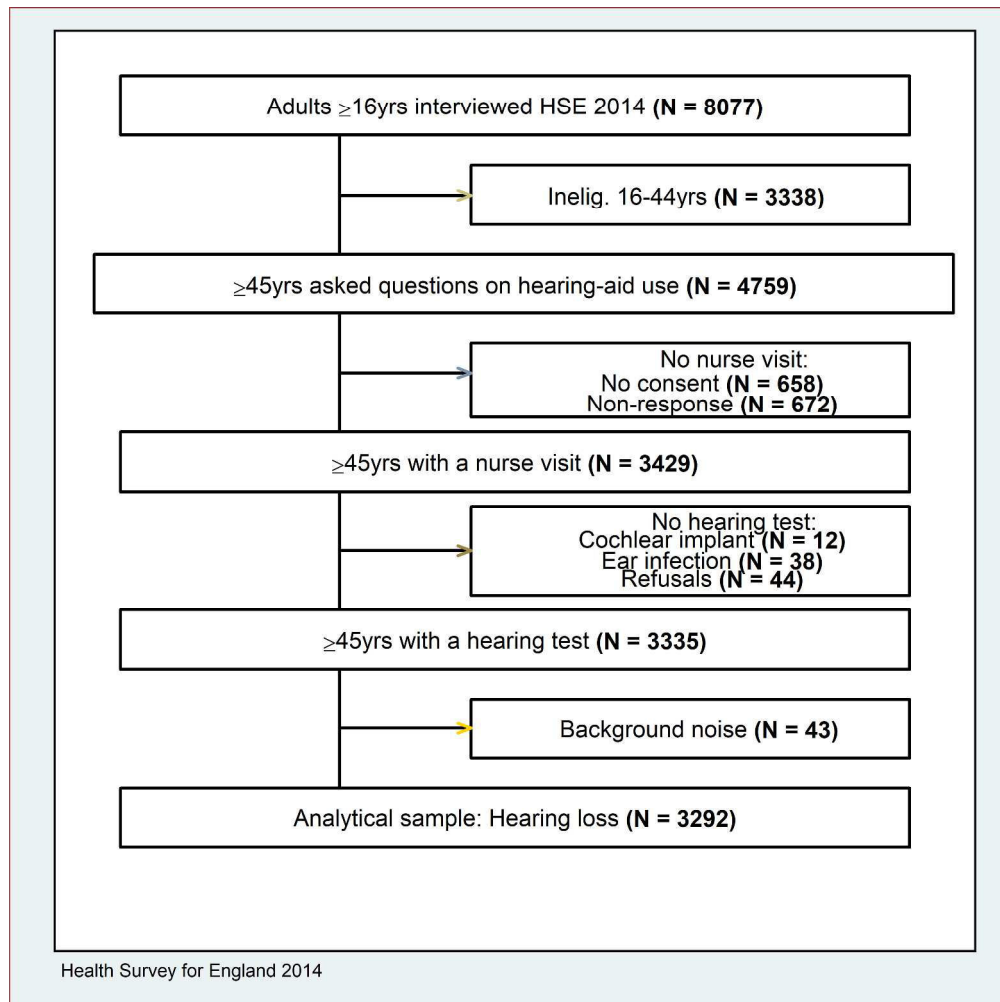

Selection of Study Participants, Health Survey for England 2014

338x338mm (300 x 300 DPI)





Associations between socioeconomic status (SES) and hearing loss in middle-aged and older adults. Indicators of SES were: equivalised household income tertiles (highest tertile as reference), Index of Multiple Deprivation quintiles (most affluent), and highest educational attainment (degree or higher). Lines represent Odds Ratio (outcome = hearing loss) and its 95% confidence interval. Model A (triangles): adjusted for age. Model B (circles): adjusted for: age, exposure to work-related noise, region, and CVD risk factors (smoking, body mass index, diabetes, hypertension, dyslipidaemia, and physical inactivity).

350x250mm (300 x 300 DPI)





Associations between SES and current hearing aid use in middle-aged and older adults with hearing loss. Indicators of SES were: equivalised household income tertiles (highest tertile as reference), Index of Multiple Deprivation quintiles (least deprived Q1 and Q2), and highest educational attainment (O level or above). Lines represent Odds Ratio (outcome = hearing aid use) and its 95% confidence interval. Model A (triangles): adjusted for age. Model B (circles): adjusted for: age, severity of hearing loss, exposure to work-related noise, region, and CVD risk factors (smoking, body mass index, diabetes, hypertension, dyslipidaemia, and physical inactivity).

350x250mm (300 x 300 DPI)

1  
2  
3  
4  
5  
6  
7  
8  
9  
10  
11  
12  
13  
14  
15  
16  
17  
18  
19  
20  
21  
22  
23  
24  
25  
26  
27  
28  
29  
30  
31  
32  
33  
34  
35  
36  
37  
38  
39  
40  
41  
42  
43  
44  
45  
46  
47  
48  
49  
50  
51  
52  
53  
54  
55  
56  
57  
58  
59  
60

**Supplementary Tables**

Scholes S, Biddulph J, Davis AC and Mindell JS. Socioeconomic differences in hearing among middle-aged and older adults: cross-sectional analyses using the Health Survey for England. *Submitted to BMJ Open.*

For peer review only

**Supplementary Table 1** Characteristics of participants aged 45+ with main interview with and without nurse visit

|                                           | No nurse visit | Nurse visit  | P-value |
|-------------------------------------------|----------------|--------------|---------|
| <b>N</b>                                  | <b>1,330</b>   | <b>3,429</b> |         |
| <b>Age in years: mean (SD)</b>            | 62.4 (12.4)    | 63.0 (11.7)  | 0.129   |
| <b>Age (%):</b>                           |                |              |         |
| 45-54                                     | 34.7           | 29.8         | <0.001  |
| 55-64                                     | 24.7           | 25.7         |         |
| 65-74                                     | 20.8           | 26.6         |         |
| 75+                                       | 19.8           | 18.0         |         |
| <b>Sex (%):</b>                           |                |              |         |
| Males                                     | 46.2           | 45.1         | 0.502   |
| Females                                   | 53.8           | 54.9         |         |
| <b>Region (%):</b>                        |                |              |         |
| North                                     | 37.3           | 31.7         | <0.001  |
| Midlands                                  | 27.0           | 30.6         |         |
| London                                    | 11.0           | 8.0          |         |
| South                                     | 24.7           | 29.8         |         |
| <b>Occupational noise exposure (%):</b>   |                |              |         |
| None                                      | 71.4           | 69.1         | 0.004   |
| Less than 5 years                         | 7.6            | 10.9         |         |
| 5 years or more                           | 20.3           | 19.8         |         |
| Missing                                   | 0.7            | 0.2          |         |
| <b>Income tertiles (%):</b>               |                |              |         |
| Highest                                   | 24.6           | 29.2         | 0.002   |
| Middle                                    | 22.6           | 30.9         |         |
| Lowest                                    | 22.6           | 22.2         |         |
| Missing                                   | 30.2           | 17.8         |         |
| <b>Index of Multiple Deprivation (%):</b> |                |              |         |
| Least deprived                            | 19.9           | 24.5         | <0.001  |
| 2 <sup>nd</sup>                           | 22.0           | 22.5         |         |
| 3 <sup>rd</sup>                           | 18.4           | 21.3         |         |
| 4 <sup>th</sup>                           | 19.3           | 17.6         |         |
| Most deprived                             | 20.3           | 14.1         |         |
| <b>Education (%):</b>                     |                |              |         |
| Degree                                    | 17.0           | 19.7         | <0.001  |
| Below degree                              | 45.5           | 50.7         |         |
| No qualifications                         | 36.0           | 29.5         |         |
| Missing                                   | 1.5            | 0.1          |         |
| <b>Smoking status (%):</b>                |                |              |         |
| Never                                     | 51.8           | 54.1         | 0.011   |
| Former                                    | 30.2           | 32.3         |         |
| Current                                   | 16.8           | 13.6         |         |
| Missing                                   | 1.1            | 0.0          |         |
| <b>BMI (%):</b>                           |                |              |         |
| Normal                                    | 18.3           | 24.9         | 0.291   |
| Overweight                                | 31.1           | 37.2         |         |
| Obese                                     | 23.8           | 28.2         |         |

|                                       |      |      |        |
|---------------------------------------|------|------|--------|
| Missing                               | 26.8 | 9.8  |        |
| <b>Doctor-diagnosed diabetes (%):</b> |      |      |        |
| No                                    | 89.5 | 89.6 | 0.886  |
| Yes                                   | 10.5 | 10.4 |        |
| Missing                               | 0.0  | 0.0  |        |
| <b>Hearing difficulty (%):</b>        |      |      |        |
| None                                  | 68.2 | 60.0 | <0.001 |
| Slight                                | 15.4 | 22.7 |        |
| Moderate                              | 7.5  | 8.7  |        |
| Great                                 | 8.2  | 8.0  |        |
| Missing                               | 0.7  | 0.5  |        |
| <b>Hearing aid use (%):</b>           |      |      |        |
| Current                               | 10.1 | 9.5  | 0.748  |
| Used but not nowadays                 | 3.1  | 3.3  |        |
| Never used                            | 86.3 | 87.1 |        |
| Missing                               | 0.5  | 0.1  |        |

Abbreviations: BMI: body mass index; SD: standard deviation

Notes: Analysis is unweighted. Data are presented as mean and standard deviation (SD) for continuous variables; and as the column (%) for categorical variables. *P*-values are based on the t-test for continuous variables and the chi-square test  $\chi^2$  for categorical variables (excluding missing data on covariates) for the comparison of differences in the covariates between the two groups of participants (with and without nurse-visit data). No adjustment for multiple comparisons was performed.

**Supplementary Table 2** Age-standardised prevalence (%) and standard error (SE) of hearing loss, persons aged 45 years and over, HSE 2014

| Characteristics            | Males |                      |                  |                            |          | Females |                      |                  |                            |          |
|----------------------------|-------|----------------------|------------------|----------------------------|----------|---------|----------------------|------------------|----------------------------|----------|
|                            | n     | Hearing loss % (SE)* | Moderate % (SE)† | Moderate to severe % (SE)‡ | P-value§ | n       | Hearing loss % (SE)* | Moderate % (SE)† | Moderate to severe % (SE)‡ | P-value§ |
| <b>Region:</b>             |       |                      |                  |                            |          |         |                      |                  |                            |          |
| North                      | 485   | 26.7 (2.1)           | 14.9 (1.7)       | 11.8 (1.6)                 | 0.618    | 556     | 20.2 (1.6)           | 13.0 (1.4)       | 7.2 (1.1)                  | 0.322    |
| Midlands                   | 454   | 28.0 (2.1)           | 16.9 (1.6)       | 11.1 (1.7)                 |          | 558     | 21.6 (1.7)           | 13.0 (1.4)       | 8.6 (1.2)                  |          |
| London                     | 113   | 21.9 (5.1)           | 14.1 (4.0)       | 7.8 (3.6)                  |          | 142     | 15.6 (3.5)           | 9.4 (2.8)        | 6.2 (2.5)                  |          |
| South                      | 433   | 25.4 (2.3)           | 14.0 (1.8)       | 11.4 (1.6)                 |          | 551     | 18.1 (1.8)           | 11.3 (1.3)       | 6.8 (1.2)                  |          |
| <b>Smoking status:</b>     |       |                      |                  |                            |          |         |                      |                  |                            |          |
| Never smoked               | 709   | 24.9 (1.8)           | 14.0 (1.4)       | 10.9 (1.3)                 | 0.102    | 1083    | 19.1 (1.3)           | 11.5 (1.0)       | 7.6 (0.9)                  | 0.290    |
| Ex-regular                 | 559   | 26.0 (1.9)           | 15.1 (1.5)       | 10.9 (1.2)                 |          | 494     | 17.6 (1.6)           | 11.0 (1.3)       | 6.6 (1.1)                  |          |
| Current smoker             | 217   | 32.9 (4.1)           | 17.1 (3.1)       | 15.8 (3.8)                 |          | 230     | 23.0 (3.4)           | 14.9 (2.8)       | 8.1 (2.6)                  |          |
| <b>BMI:</b>                |       |                      |                  |                            |          |         |                      |                  |                            |          |
| Normal                     | 297   | 27.1 (3.2)           | 16.3 (2.4)       | 10.8 (2.4)                 | 0.529    | 535     | 15.6 (1.7)           | 7.3 (1.1)        | 8.4 (1.4)                  | 0.135    |
| Overweight                 | 658   | 24.0 (1.7)           | 13.6 (1.4)       | 10.4 (1.1)                 |          | 565     | 20.3 (1.7)           | 13.0 (1.5)       | 7.4 (1.1)                  |          |
| Obese                      | 401   | 26.9 (2.2)           | 16.4 (1.8)       | 10.5 (1.7)                 |          | 519     | 19.7 (1.9)           | 15.0 (1.7)       | 4.6 (1.1)                  |          |
| <b>Diagnosed diabetes:</b> |       |                      |                  |                            |          |         |                      |                  |                            |          |
| No                         | 1294  | 24.2 (1.3)           | 13.7 (1.0)       | 10.6 (1.0)                 | <0.001   | 1652    | 18.4 (1.0)           | 11.0 (0.8)       | 7.4 (0.7)                  | 0.005    |
| Yes                        | 191   | 40.4 (3.9)           | 26.2 (3.5)       | 14.2 (2.5)                 |          | 154     | 28.8 (4.0)           | 21.2 (3.7)       | 7.6 (1.9)                  |          |
| <b>Raised Hb1Ac:</b>       |       |                      |                  |                            |          |         |                      |                  |                            |          |
| No                         | 981   | 23.6 (1.4)           | 13.1 (1.1)       | 10.6 (1.1)                 | <0.001   | 1189    | 17.9 (1.2)           | 10.7 (0.9)       | 7.2 (0.9)                  | 0.025    |
| Yes                        | 140   | 39.8 (4.3)           | 25.5 (4.0)       | 14.3 (2.9)                 |          | 114     | 27.1 (4.4)           | 17.0 (3.6)       | 10.1 (3.0)                 |          |
| <b>Hypertension:</b>       |       |                      |                  |                            |          |         |                      |                  |                            |          |
| No                         | 630   | 27.7 (2.0)           | 17.4 (1.7)       | 10.3 (1.6)                 | 0.752    | 906     | 18.6 (1.6)           | 11.7 (1.3)       | 6.9 (1.1)                  | 0.133    |
| Yes                        | 640   | 26.8 (1.9)           | 14.5 (1.5)       | 12.4 (1.3)                 |          | 707     | 22.0 (1.6)           | 13.8 (1.3)       | 8.2 (1.0)                  |          |
| <b>Dyslipidaemia:</b>      |       |                      |                  |                            |          |         |                      |                  |                            |          |
| No                         | 483   | 29.7 (2.3)           | 17.0 (2.0)       | 12.7 (1.5)                 | 0.031    | 389     | 22.0 (2.1)           | 13.5 (1.7)       | 8.5 (1.5)                  | 0.098    |
| Yes                        | 637   | 23.2 (2.1)           | 13.2 (1.5)       | 10.0 (1.7)                 |          | 915     | 17.8 (1.5)           | 10.9 (1.2)       | 6.8 (1.0)                  |          |

1  
2  
3  
4  
5  
6  
7  
8  
9  
10  
11  
12  
13  
14  
15  
16  
17  
18  
19  
20  
21  
22  
23  
24  
25  
26  
27  
28  
29  
30  
31  
32  
33  
34  
35  
36  
37  
38  
39  
40  
41  
42  
43  
44  
45  
46

**Physically inactive:**

|     |     |            |            |            |       |     |            |            |           |       |
|-----|-----|------------|------------|------------|-------|-----|------------|------------|-----------|-------|
| No  | 838 | 24.1 (1.7) | 14.3 (1.3) | 9.9 (1.3)  | 0.180 | 875 | 16.0 (1.5) | 10.8 (1.3) | 5.2 (1.0) | 0.028 |
| Yes | 437 | 27.7 (2.2) | 16.0 (1.7) | 11.7 (1.5) |       | 649 | 20.9 (1.6) | 13.4 (1.3) | 7.4 (1.0) |       |

\* Hearing loss: >35dBHL at 3.0 kHz (tone not heard at 35dBHL).  
† Moderate loss: >35 to 54dBHL (tone not heard at 35dBHL, but heard at 55 and at 75dBHL).  
‡ Moderately severe or severe loss: >55 dBHL (tone not heard at 35 and at 55dBHL, but may or may not have heard the tone at 75dBHL).  
§ Prevalence of hearing loss (>35dBHL at 3.0 kHz in the better hearing ear) across the categories of each variable (region; smoking status; BMI; diagnosed diabetes; Hb1Ac; hypertension; dyslipidaemia; physical activity) were compared using the Chi-square ( $\chi^2$ ) tests. No adjustment to the p-values for multiple comparisons was made.

For peer review only

**Supplementary Table 3** Age-standardized prevalence (%) and standard error (SE) of hearing aid use among persons with hearing loss, persons aged 45 years and over, HSE 2014

|                             | Men |                        |          | Women |                        |          |
|-----------------------------|-----|------------------------|----------|-------|------------------------|----------|
|                             | N   | Hearing aid use % (SE) | P-value* | N     | Hearing aid use % (SE) | P-value* |
| <b>Smoking status:</b>      |     |                        |          |       |                        |          |
| Never smoked                | 182 | 35.3 (4.1)             | 0.452    | 202   | 32.7 (4.2)             | 0.849    |
| Ex-regular                  | 189 | 28.4 (3.8)             |          | 96    | 31.1 (5.9)             |          |
| Current smoker              | 54  | 27.5 (7.6)             |          | 46    | 27.4 (8.0)             |          |
| <b>BMI:</b>                 |     |                        |          |       |                        |          |
| Normal                      | 72  | 27.2 (6.7)             | 0.789    | 72    | 36.2 (8.1)             | 0.362    |
| Overweight                  | 181 | 30.7 (5.5)             |          | 112   | 23.5 (4.9)             |          |
| Obese                       | 113 | 33.5 (5.5)             |          | 90    | 25.9 (6.0)             |          |
| <b>Diagnosed diabetes:</b>  |     |                        |          |       |                        |          |
| No                          | 338 | 32.5 (3.6)             | 0.101    | 287   | 29.6 (3.8)             | 0.077    |
| Yes                         | 87  | 20.5 (5.6)             |          | 56    | 13.5 (6.4)             |          |
| <b>Raised Hb1Ac:</b>        |     |                        |          |       |                        |          |
| No                          | 234 | 30.2 (4.0)             | 0.510    | 184   | 31.4 (4.5)             | 0.194    |
| Yes                         | 62  | 24.3 (7.5)             |          | 35    | 17.4 (8.3)             |          |
| <b>Hypertension:</b>        |     |                        |          |       |                        |          |
| No                          | 159 | 30.7 (4.6)             | 0.761    | 113   | 30.1 (5.2)             | 0.803    |
| Yes                         | 223 | 28.7 (4.8)             |          | 201   | 28.4 (4.9)             |          |
| <b>Dyslipidaemia:</b>       |     |                        |          |       |                        |          |
| No                          | 172 | 29.0 (4.8)             | 0.910    | 88    | 24.7 (7.6)             | 0.584    |
| Yes                         | 126 | 28.2 (5.2)             |          | 132   | 29.8 (4.9)             |          |
| <b>Physically inactive:</b> |     |                        |          |       |                        |          |
| No                          | 182 | 30.3 (4.5)             | 0.628    | 99    | 36.6 (5.6)             | 0.003    |
| Yes                         | 162 | 26.8 (5.4)             |          | 162   | 15.8 (3.9)             |          |

\* Prevalence of current hearing aid use across the categories of each variable (region; smoking status; BMI; diagnosed diabetes; Hb1Ac; hypertension; dyslipidaemia; physical activity) were compared using the Chi-square ( $\chi^2$ ) test. No adjustment to the p-values for multiple comparisons was made

## STROBE Statement—checklist of items that should be included in reports of observational studies

Scholes S, Biddulph J, Davis AC, Mindell JS. Socioeconomic differences in hearing among middle-aged and older adults: cross-sectional analyses using the Health Survey for England. Submitted to BMJ Open.

|   |                         | <b>Recommendation</b>                                                                                                                                                            | <b>Author response</b>                                                                                                                                                                                                                                                                        |
|---|-------------------------|----------------------------------------------------------------------------------------------------------------------------------------------------------------------------------|-----------------------------------------------------------------------------------------------------------------------------------------------------------------------------------------------------------------------------------------------------------------------------------------------|
| 1 | <b>Title / abstract</b> | (a) Indicate the study's design with a commonly used term in the title or the abstract                                                                                           | Yes. The title of our submitted manuscript is: "Socioeconomic differences in hearing among middle-aged and older adults: <b>cross-sectional analyses</b> using the Health Survey for England".                                                                                                |
|   |                         | (b) Provide in the abstract an informative and balanced summary of what was done and what was found                                                                              | Yes                                                                                                                                                                                                                                                                                           |
| 2 | <b>Introduction</b>     | Explain the scientific background and rationale for the investigation being reported                                                                                             | Yes. The background and rationale for our study are outlined in the Introduction (1 <sup>st</sup> and 2 <sup>nd</sup> paragraphs, respectively).                                                                                                                                              |
| 3 |                         | State specific objectives, including any prespecified hypotheses                                                                                                                 | Yes. The primary and secondary aims are outlined in the second paragraph of the Introduction. We did not have any pre-specified hypotheses.                                                                                                                                                   |
| 4 | Methods                 | <i>Study design</i> : Present key elements of study design early in the paper                                                                                                    | Yes. The first sentence of the Methods Section states that the present study uses data from the Health Survey for England, an annual nationally-representative cross-sectional survey of the non-institutionalised general population.                                                        |
| 5 |                         | <i>Setting</i> : Describe the setting, locations, and relevant dates, including periods of recruitment, exposure, follow-up, and data collection                                 | Yes. The study setting is outlined in the first paragraph of the Methods Section.                                                                                                                                                                                                             |
| 6 |                         | <i>Participants (cross-sectional study)</i> : Give the eligibility criteria, and the sources and methods of selection of participants                                            | Yes. The participants in this study (including eligibility criteria) are described in the 1 <sup>st</sup> and 2 <sup>nd</sup> paragraphs of the Methods section. Figure 1 is a flowchart which shows the derivation of the analytical sample used to estimate the prevalence of hearing loss. |
| 7 |                         | <i>Variables</i> : Clearly define all outcomes, exposures, predictors, potential confounders, and effect modifiers. Give diagnostic criteria, if applicable                      | Yes. The key variables for this study (hearing outcomes; markers of socioeconomic status (SES), and various potential confounders of the SES-hearing associations) are clearly defined under the appropriate heading (hearing loss, socioeconomic status, and covariates)                     |
| 8 |                         | <i>Data sources / measurement</i> : For each variable of interest, give sources of data and details of methods of assessment (measurement). Describe comparability of assessment | Yes, sources of details and methods of assessment are outlined under the appropriate heading (hearing loss, socioeconomic status, and covariates).                                                                                                                                            |



|    |                |                                                                                                                                                                                                                                                                                                                                                                                                      |                                                                                                                                                                                                                                                                                                                                                                                                                                                                                                                                                                                                                                                                                                                                                                                                                                                                                                                                                                   |
|----|----------------|------------------------------------------------------------------------------------------------------------------------------------------------------------------------------------------------------------------------------------------------------------------------------------------------------------------------------------------------------------------------------------------------------|-------------------------------------------------------------------------------------------------------------------------------------------------------------------------------------------------------------------------------------------------------------------------------------------------------------------------------------------------------------------------------------------------------------------------------------------------------------------------------------------------------------------------------------------------------------------------------------------------------------------------------------------------------------------------------------------------------------------------------------------------------------------------------------------------------------------------------------------------------------------------------------------------------------------------------------------------------------------|
|    |                | methods if there is more than one group                                                                                                                                                                                                                                                                                                                                                              |                                                                                                                                                                                                                                                                                                                                                                                                                                                                                                                                                                                                                                                                                                                                                                                                                                                                                                                                                                   |
| 9  |                | <i>Bias</i> Describe any efforts to address potential sources of bias                                                                                                                                                                                                                                                                                                                                | We discussed the potential source of bias through missing data as a result of: (1) survey non-response (main interview and nurse visit); and (2) interviewer-participant communication difficulties through conditions such as deafness. The appropriate non-response weights archived with the data were used in all analyses.<br><br>Potential bias arising from both potential sources of missing data is discussed in the section on Study limitations (see Checklist Item No. 19).                                                                                                                                                                                                                                                                                                                                                                                                                                                                           |
| 10 |                | <i>Study size</i> : Explain how the study size was arrived at.                                                                                                                                                                                                                                                                                                                                       | Yes, Figure 1 shows the derivation of the analytical sample. We explain in the Methods section that participants aged 16-44 years were excluded due to hearing loss being comparatively rare. We explain that the analysis of hearing aid use was carried out only on the subset of participants with hearing loss.                                                                                                                                                                                                                                                                                                                                                                                                                                                                                                                                                                                                                                               |
| 11 |                | Quantitative variables: Explain how quantitative variables were handled in the analyses. If applicable, describe which groupings were chosen and why                                                                                                                                                                                                                                                 | Yes.                                                                                                                                                                                                                                                                                                                                                                                                                                                                                                                                                                                                                                                                                                                                                                                                                                                                                                                                                              |
| 12 |                | <i>Statistical methods</i> : (a) Describe all statistical methods, including those used to control for confounding; (b) Describe any methods used to examine subgroups and interactions; (c) Explain how missing data were addressed; (d) <i>Cross-sectional study</i> —If applicable, describe analytical methods taking account of sampling strategy; (e) <i>Describe any sensitivity analyses</i> | (a) Yes. Firstly, prevalence estimates across subgroups were age-standardised within sex to the 2014 English household population. Secondly, a fully-adjusted model was used to examine the SES-hearing associations. Potential confounders adjusted for in the modelling included age, duration of work-related exposure, and CVD risk factors. Severity of hearing loss was adjusted for in the analysis of hearing aid use.<br><br>(b) Yes, the chi-square test was used to test subgroup differences in hearing outcomes.<br><br>(c) <i>Missing data</i> : analyses were weighted by the nurse-visit weight: this accounts for individual non-participation and preserves the national representativeness of the sample.<br><br>(d) <i>Sampling strategy</i> : the weighting and clustering of participants within PSUs were accounted for by using design-based inference (the complex survey module in Stata).<br><br>(e) <i>Sensitivity analyses</i> : N/A |
| 13 | <b>Results</b> | <i>Participants</i> : (a) Report numbers of individuals at each stage of study—eg numbers potentially eligible, examined for eligibility, confirmed eligible, included in                                                                                                                                                                                                                            | Yes, Reasons for exclusion at each stage of the study are shown in the flow diagram ( <b>Figure 1</b> ).                                                                                                                                                                                                                                                                                                                                                                                                                                                                                                                                                                                                                                                                                                                                                                                                                                                          |

|    |                   |                                                                                                                                                                                                                                                                                                                                                                                                                                |                                                                                                                                                                                                                                                                                                                                                                                                                                                                                                                                                           |
|----|-------------------|--------------------------------------------------------------------------------------------------------------------------------------------------------------------------------------------------------------------------------------------------------------------------------------------------------------------------------------------------------------------------------------------------------------------------------|-----------------------------------------------------------------------------------------------------------------------------------------------------------------------------------------------------------------------------------------------------------------------------------------------------------------------------------------------------------------------------------------------------------------------------------------------------------------------------------------------------------------------------------------------------------|
|    |                   | the study, completing follow-up, and analysed; (b) Give reasons for non-participation at each stage; (c) Consider use of a flow diagram                                                                                                                                                                                                                                                                                        |                                                                                                                                                                                                                                                                                                                                                                                                                                                                                                                                                           |
| 14 |                   | <i>Descriptive data:</i> (a) Give characteristics of study participants (eg demographic, clinical, social) and information on exposures and potential confounders; (b) Indicate number of participants with missing data for each variable of interest                                                                                                                                                                         | Yes, Supplementary Table 1 shows the characteristics of participants aged 45+ with main interview data with and without nurse visit data (including the number of participants with missing data for each variable of interest).                                                                                                                                                                                                                                                                                                                          |
| 15 |                   | <i>Outcome data:</i> Report numbers of outcome events or summary measures                                                                                                                                                                                                                                                                                                                                                      | Yes, we outline the number of participants with hearing loss (769/3292) and the number of participants with hearing loss reporting current use of a hearing aid (264/769). Prevalence estimates are set out in Table 1 (hearing loss) and Table 2 (current hearing aid use).                                                                                                                                                                                                                                                                              |
| 16 |                   | <i>Main results:</i> (a) Give unadjusted estimates and, if applicable, confounder-adjusted estimates and their precision (eg, 95% confidence interval). Make clear which confounders were adjusted for and why they were included; (b) Report category boundaries when continuous variables were categorized; (c) If relevant, consider translating estimates of relative risk into absolute risk for a meaningful time period | We present odds ratios (and accompanying 95% CIs) for the SES-hearing associations in both age-adjusted and fully-adjusted models in Figures 2 and 3. The estimates are displayed graphically to avoid lengthy tables.<br><br>The legends for Figures 2 and 3 make clear which confounders were adjusted for. In the Methods Section we explain that modifiable risk factors for CVD such as diabetes have been independently associated with hearing impairment and are also possible confounders for any observed associations between SES and hearing. |
| 17 |                   | <i>Other analyses:</i> Report other analyses done—eg analyses of subgroups and interactions, and sensitivity analyses                                                                                                                                                                                                                                                                                                          | Yes, the analysis of current hearing aid use is based on the subset of participants with objectively measured hearing loss.                                                                                                                                                                                                                                                                                                                                                                                                                               |
| 18 | <b>Discussion</b> | <i>Key results:</i> Summarise key results with reference to study objectives                                                                                                                                                                                                                                                                                                                                                   | Yes, we summarise the key results with reference to the study objectives in the first paragraph of the Discussion.                                                                                                                                                                                                                                                                                                                                                                                                                                        |
| 19 |                   | <i>Limitations:</i> Discuss limitations of the study, taking into account sources of potential bias or imprecision. Discuss both direction and magnitude of any potential bias                                                                                                                                                                                                                                                 | Yes, the limitations of the study are outlined in the Discussion. Limitations include missing data (accounted for by the use of non-response weighting), the small number of participants with hearing loss, and the unknown influence of unmeasured confounders. We state that since this study utilises cross-sectional data, we could not establish the direction of the observed associations, and we cannot establish causality.                                                                                                                     |
| 20 |                   | <i>Interpretation:</i> Give a cautious overall interpretation of results considering objectives, limitations, multiplicity of                                                                                                                                                                                                                                                                                                  | Yes, in the Discussion we present a cautious overall interpretation of the main findings.                                                                                                                                                                                                                                                                                                                                                                                                                                                                 |

|    |                          |                                                                                                                                                                               |                                                                                                          |
|----|--------------------------|-------------------------------------------------------------------------------------------------------------------------------------------------------------------------------|----------------------------------------------------------------------------------------------------------|
|    |                          | analyses, results from similar studies, and other relevant evidence                                                                                                           |                                                                                                          |
| 21 |                          | <i>Generalisability:</i> Discuss the generalisability (external validity) of the study results                                                                                | Yes                                                                                                      |
| 22 | <b>Other Information</b> | <i>Funding:</i> Give the source of funding and the role of the funders for the present study and, if applicable, for the original study on which the present article is based | The Health Survey for England 2014 was funded by NHS Digital. This particular study received no funding. |

For peer review only
