# Supplementary material for: Socioeconomic differences in hearing among middle-aged and older adults: cross-sectional analyses using the Health Survey for England
Source: PubMed Central journal article supplement — BMJ Open. 2018 Feb 1;8(2):e019615. doi: 10.1136/bmjopen-2017-019615 (PMC5829909; doi:10.1136/bmjopen-2017-019615), 2018-02-01
Supplement: bmjopen-2017-019615supp001.pdf [file bmjopen-2017-019615supp001.pdf]

### **Supplementary Tables**

Scholes S, Biddulph J, Davis AC and Mindell JS. Socioeconomic differences in hearing among middle-aged and older adults: cross-sectional analyses using the Health Survey for England. *Submitted to BMJ Open*.

**Supplementary Table 1** Characteristics of participants aged 45+ with main interview with and without nurse visit

|                                           | No nurse visit | Nurse visit  | P-value |
|-------------------------------------------|----------------|--------------|---------|
| <b>N</b>                                  | <b>1,330</b>   | <b>3,429</b> |         |
| <b>Age in years: mean (SD)</b>            | 62.4 (12.4)    | 63.0 (11.7)  | 0.129   |
| <b>Age (%):</b>                           |                |              |         |
| 45-54                                     | 34.7           | 29.8         | <0.001  |
| 55-64                                     | 24.7           | 25.7         |         |
| 65-74                                     | 20.8           | 26.6         |         |
| 75+                                       | 19.8           | 18.0         |         |
| <b>Sex (%):</b>                           |                |              |         |
| Males                                     | 46.2           | 45.1         | 0.502   |
| Females                                   | 53.8           | 54.9         |         |
| <b>Region (%):</b>                        |                |              |         |
| North                                     | 37.3           | 31.7         | <0.001  |
| Midlands                                  | 27.0           | 30.6         |         |
| London                                    | 11.0           | 8.0          |         |
| South                                     | 24.7           | 29.8         |         |
| <b>Occupational noise exposure (%):</b>   |                |              |         |
| None                                      | 71.4           | 69.1         | 0.004   |
| Less than 5 years                         | 7.6            | 10.9         |         |
| 5 years or more                           | 20.3           | 19.8         |         |
| Missing                                   | 0.7            | 0.2          |         |
| <b>Income tertiles (%):</b>               |                |              |         |
| Highest                                   | 24.6           | 29.2         | 0.002   |
| Middle                                    | 22.6           | 30.9         |         |
| Lowest                                    | 22.6           | 22.2         |         |
| Missing                                   | 30.2           | 17.8         |         |
| <b>Index of Multiple Deprivation (%):</b> |                |              |         |
| Least deprived                            | 19.9           | 24.5         | <0.001  |
| 2 <sup>nd</sup>                           | 22.0           | 22.5         |         |
| 3 <sup>rd</sup>                           | 18.4           | 21.3         |         |
| 4 <sup>th</sup>                           | 19.3           | 17.6         |         |
| Most deprived                             | 20.3           | 14.1         |         |
| <b>Education (%):</b>                     |                |              |         |
| Degree                                    | 17.0           | 19.7         | <0.001  |
| Below degree                              | 45.5           | 50.7         |         |
| No qualifications                         | 36.0           | 29.5         |         |
| Missing                                   | 1.5            | 0.1          |         |
| <b>Smoking status (%):</b>                |                |              |         |
| Never                                     | 51.8           | 54.1         | 0.011   |
| Former                                    | 30.2           | 32.3         |         |
| Current                                   | 16.8           | 13.6         |         |
| Missing                                   | 1.1            | 0.0          |         |
| <b>BMI (%):</b>                           |                |              |         |
| Normal                                    | 18.3           | 24.9         | 0.291   |
| Overweight                                | 31.1           | 37.2         |         |
| Obese                                     | 23.8           | 28.2         |         |

|                                       |      |      |        |
|---------------------------------------|------|------|--------|
| Missing                               | 26.8 | 9.8  |        |
| <b>Doctor-diagnosed diabetes (%):</b> |      |      |        |
| No                                    | 89.5 | 89.6 | 0.886  |
| Yes                                   | 10.5 | 10.4 |        |
| Missing                               | 0.0  | 0.0  |        |
| <b>Hearing difficulty (%):</b>        |      |      |        |
| None                                  | 68.2 | 60.0 | <0.001 |
| Slight                                | 15.4 | 22.7 |        |
| Moderate                              | 7.5  | 8.7  |        |
| Great                                 | 8.2  | 8.0  |        |
| Missing                               | 0.7  | 0.5  |        |
| <b>Hearing aid use (%):</b>           |      |      |        |
| Current                               | 10.1 | 9.5  | 0.748  |
| Used but not nowadays                 | 3.1  | 3.3  |        |
| Never used                            | 86.3 | 87.1 |        |
| Missing                               | 0.5  | 0.1  |        |

Abbreviations: BMI: body mass index; SD: standard deviation

Notes: Analysis is unweighted. Data are presented as mean and standard deviation (SD) for continuous variables; and as the column (%) for categorical variables. *P*-values are based on the t-test for continuous variables and the chi-square test  $\chi^2$  for categorical variables (excluding missing data on covariates) for the comparison of differences in the covariates between the two groups of participants (with and without nurse-visit data). No adjustment for multiple comparisons was performed.

**Supplementary Table 2** Age-standardised prevalence (%) and standard error (SE) of hearing loss, persons aged 45 years and over, HSE 2014

| Characteristics            | Males |                      |                  |                            |                  | Females |                      |                  |                            |                  |
|----------------------------|-------|----------------------|------------------|----------------------------|------------------|---------|----------------------|------------------|----------------------------|------------------|
|                            | n     | Hearing loss % (SE)* | Moderate % (SE)† | Moderate to severe % (SE)‡ | <i>P</i> -value§ | n       | Hearing loss % (SE)* | Moderate % (SE)† | Moderate to severe % (SE)‡ | <i>P</i> -value§ |
| <b>Region:</b>             |       |                      |                  |                            |                  |         |                      |                  |                            |                  |
| North                      | 485   | 26.7 (2.1)           | 14.9 (1.7)       | 11.8 (1.6)                 | 0.618            | 556     | 20.2 (1.6)           | 13.0 (1.4)       | 7.2 (1.1)                  | 0.322            |
| Midlands                   | 454   | 28.0 (2.1)           | 16.9 (1.6)       | 11.1 (1.7)                 |                  | 558     | 21.6 (1.7)           | 13.0 (1.4)       | 8.6 (1.2)                  |                  |
| London                     | 113   | 21.9 (5.1)           | 14.1 (4.0)       | 7.8 (3.6)                  |                  | 142     | 15.6 (3.5)           | 9.4 (2.8)        | 6.2 (2.5)                  |                  |
| South                      | 433   | 25.4 (2.3)           | 14.0 (1.8)       | 11.4 (1.6)                 |                  | 551     | 18.1 (1.8)           | 11.3 (1.3)       | 6.8 (1.2)                  |                  |
| <b>Smoking status:</b>     |       |                      |                  |                            |                  |         |                      |                  |                            |                  |
| Never smoked               | 709   | 24.9 (1.8)           | 14.0 (1.4)       | 10.9 (1.3)                 | 0.102            | 1083    | 19.1 (1.3)           | 11.5 (1.0)       | 7.6 (0.9)                  | 0.290            |
| Ex-regular                 | 559   | 26.0 (1.9)           | 15.1 (1.5)       | 10.9 (1.2)                 |                  | 494     | 17.6 (1.6)           | 11.0 (1.3)       | 6.6 (1.1)                  |                  |
| Current smoker             | 217   | 32.9 (4.1)           | 17.1 (3.1)       | 15.8 (3.8)                 |                  | 230     | 23.0 (3.4)           | 14.9 (2.8)       | 8.1 (2.6)                  |                  |
| <b>BMI:</b>                |       |                      |                  |                            |                  |         |                      |                  |                            |                  |
| Normal                     | 297   | 27.1 (3.2)           | 16.3 (2.4)       | 10.8 (2.4)                 | 0.529            | 535     | 15.6 (1.7)           | 7.3 (1.1)        | 8.4 (1.4)                  | 0.135            |
| Overweight                 | 658   | 24.0 (1.7)           | 13.6 (1.4)       | 10.4 (1.1)                 |                  | 565     | 20.3 (1.7)           | 13.0 (1.5)       | 7.4 (1.1)                  |                  |
| Obese                      | 401   | 26.9 (2.2)           | 16.4 (1.8)       | 10.5 (1.7)                 |                  | 519     | 19.7 (1.9)           | 15.0 (1.7)       | 4.6 (1.1)                  |                  |
| <b>Diagnosed diabetes:</b> |       |                      |                  |                            |                  |         |                      |                  |                            |                  |
| No                         | 1294  | 24.2 (1.3)           | 13.7 (1.0)       | 10.6 (1.0)                 | <0.001           | 1652    | 18.4 (1.0)           | 11.0 (0.8)       | 7.4 (0.7)                  | 0.005            |
| Yes                        | 191   | 40.4 (3.9)           | 26.2 (3.5)       | 14.2 (2.5)                 |                  | 154     | 28.8 (4.0)           | 21.2 (3.7)       | 7.6 (1.9)                  |                  |
| <b>Raised Hb1Ac:</b>       |       |                      |                  |                            |                  |         |                      |                  |                            |                  |
| No                         | 981   | 23.6 (1.4)           | 13.1 (1.1)       | 10.6 (1.1)                 | <0.001           | 1189    | 17.9 (1.2)           | 10.7 (0.9)       | 7.2 (0.9)                  | 0.025            |
| Yes                        | 140   | 39.8 (4.3)           | 25.5 (4.0)       | 14.3 (2.9)                 |                  | 114     | 27.1 (4.4)           | 17.0 (3.6)       | 10.1 (3.0)                 |                  |
| <b>Hypertension:</b>       |       |                      |                  |                            |                  |         |                      |                  |                            |                  |
| No                         | 630   | 27.7 (2.0)           | 17.4 (1.7)       | 10.3 (1.6)                 | 0.752            | 906     | 18.6 (1.6)           | 11.7 (1.3)       | 6.9 (1.1)                  | 0.133            |
| Yes                        | 640   | 26.8 (1.9)           | 14.5 (1.5)       | 12.4 (1.3)                 |                  | 707     | 22.0 (1.6)           | 13.8 (1.3)       | 8.2 (1.0)                  |                  |
| <b>Dyslipidaemia:</b>      |       |                      |                  |                            |                  |         |                      |                  |                            |                  |
| No                         | 483   | 29.7 (2.3)           | 17.0 (2.0)       | 12.7 (1.5)                 | 0.031            | 389     | 22.0 (2.1)           | 13.5 (1.7)       | 8.5 (1.5)                  | 0.098            |
| Yes                        | 637   | 23.2 (2.1)           | 13.2 (1.5)       | 10.0 (1.7)                 |                  | 915     | 17.8 (1.5)           | 10.9 (1.2)       | 6.8 (1.0)                  |                  |

| <b>Physically inactive:</b> |     |            |            |            |       |     |            |            |           |       |
|-----------------------------|-----|------------|------------|------------|-------|-----|------------|------------|-----------|-------|
| No                          | 838 | 24.1 (1.7) | 14.3 (1.3) | 9.9 (1.3)  | 0.180 | 875 | 16.0 (1.5) | 10.8 (1.3) | 5.2 (1.0) | 0.028 |
| Yes                         | 437 | 27.7 (2.2) | 16.0 (1.7) | 11.7 (1.5) |       | 649 | 20.9 (1.6) | 13.4 (1.3) | 7.4 (1.0) |       |

\* Hearing loss: >35dBHL at 3.0 kHz (tone not heard at 35dBHL).

† Moderate loss: >35 to 54dBHL (tone not heard at 35dBHL, but heard at 55 and at 75dBHL).

‡ Moderately severe or severe loss: >55 dBHL (tone not heard at 35 and at 55dBHL, but may or may not have heard the tone at 75dBHL).

§ Prevalence of hearing loss (>35dBHL at 3.0 kHz in the better hearing ear) across the categories of each variable (region; smoking status; BMI; diagnosed diabetes; Hb1Ac; hypertension; dyslipidaemia; physical activity) were compared using the Chi-square ( $\chi^2$ ) tests. No adjustment to the p-values for multiple comparisons was made.

**Supplementary Table 3** Age-standardized prevalence (%) and standard error (SE) of hearing aid use among persons with hearing loss, persons aged 45 years and over, HSE 2014

|                             | Men |                        |                  | Women |                        |                  |
|-----------------------------|-----|------------------------|------------------|-------|------------------------|------------------|
|                             | N   | Hearing aid use % (SE) | <i>P</i> -value* | N     | Hearing aid use % (SE) | <i>P</i> -value* |
| <b>Smoking status:</b>      |     |                        |                  |       |                        |                  |
| Never smoked                | 182 | 35.3 (4.1)             | 0.452            | 202   | 32.7 (4.2)             | 0.849            |
| Ex-regular                  | 189 | 28.4 (3.8)             |                  | 96    | 31.1 (5.9)             |                  |
| Current smoker              | 54  | 27.5 (7.6)             |                  | 46    | 27.4 (8.0)             |                  |
| <b>BMI:</b>                 |     |                        |                  |       |                        |                  |
| Normal                      | 72  | 27.2 (6.7)             | 0.789            | 72    | 36.2 (8.1)             | 0.362            |
| Overweight                  | 181 | 30.7 (5.5)             |                  | 112   | 23.5 (4.9)             |                  |
| Obese                       | 113 | 33.5 (5.5)             |                  | 90    | 25.9 (6.0)             |                  |
| <b>Diagnosed diabetes:</b>  |     |                        |                  |       |                        |                  |
| No                          | 338 | 32.5 (3.6)             | 0.101            | 287   | 29.6 (3.8)             | 0.077            |
| Yes                         | 87  | 20.5 (5.6)             |                  | 56    | 13.5 (6.4)             |                  |
| <b>Raised Hb1Ac:</b>        |     |                        |                  |       |                        |                  |
| No                          | 234 | 30.2 (4.0)             | 0.510            | 184   | 31.4 (4.5)             | 0.194            |
| Yes                         | 62  | 24.3 (7.5)             |                  | 35    | 17.4 (8.3)             |                  |
| <b>Hypertension:</b>        |     |                        |                  |       |                        |                  |
| No                          | 159 | 30.7 (4.6)             | 0.761            | 113   | 30.1 (5.2)             | 0.803            |
| Yes                         | 223 | 28.7 (4.8)             |                  | 201   | 28.4 (4.9)             |                  |
| <b>Dyslipidaemia:</b>       |     |                        |                  |       |                        |                  |
| No                          | 172 | 29.0 (4.8)             | 0.910            | 88    | 24.7 (7.6)             | 0.584            |
| Yes                         | 126 | 28.2 (5.2)             |                  | 132   | 29.8 (4.9)             |                  |
| <b>Physically inactive:</b> |     |                        |                  |       |                        |                  |
| No                          | 182 | 30.3 (4.5)             | 0.628            | 99    | 36.6 (5.6)             | 0.003            |
| Yes                         | 162 | 26.8 (5.4)             |                  | 162   | 15.8 (3.9)             |                  |

\* Prevalence of current hearing aid use across the categories of each variable (region; smoking status; BMI; diagnosed diabetes; Hb1Ac; hypertension; dyslipidaemia; physical activity) were compared using the Chi-square ( $\chi^2$ ) test. No adjustment to the p-values for multiple comparisons was made
